# Supplementary material for: Characterization of recombinant human lactoferrin expressed in Komagataella phaffii
Source: Royal Society of Chemistry journal article supplement (doi:10.1039/d4an00333k), 2024-01-01
Supplement: d4an00333k2.xlsx [file d4an00333k2.xlsx]

## Sheet: Table S1
Characterization of Recombinant Human Lactoferrin Expressed in Komagataella Phaffii
Xiaoning Lu1*, Chad Cummings1, Anthony Osuala1, Neela H. Yennawar2, Kevin E. W. Namitz2, Brittney Hellner1, Pamela B. Besada-Lombana1, Ross D. Peterson1, Anthony J. Clark1
Supplementary Table S1. Identified peptides from Helaina rhLF by multi-enzyme digestion and LC-MS/MS-based proteomics analysis
Peptide sequence	start position	stop position	Previous AA	Next AA	Peptide id probability	Modifications	Actual peptide mass (AMU)	Spectrum charge	Actual minus calculated peptide mass (AMU)	Actual minus calculated peptide mass (PPM)
GRRRSVQWC	1	9	-	A	0.991	Carbamidomethyl (+57)	1203.6	2	-0.00069	-0.57
GRRRSVQWCAV	1	11	-	S	0.963	Phospho (+80), Carbamidomethyl (+57)	1453.68	2	-0.0011	-0.77
RRSVQWCAV	3	11	R	S	0.997	Phospho (+80), Carbamidomethyl (+57)	1240.55	2	-0.00052	-0.42
RRSVQWCAVSQPEATK	3	18	R	C	0.997	Carbamidomethyl (+57)	1901.95	3	-6.3e-05	-0.033
RRSVQWCAVSQPEATK	3	18	R	C	0.991	Carbamidomethyl (+57)	1901.95	3	0.00054	0.28
RRSVQWCAVSQPEATK	3	18	R	C	0.997	Phospho (+80), Carbamidomethyl (+57)	1981.92	3	-0.00079	-0.4
RSVQWCAV	4	11	R	S	0.99	Carbamidomethyl (+57)	1004.49	2	0.00051	0.51
RSVQWCAV	4	11	R	S	0.99	Carbamidomethyl (+57)	1004.49	2	-8.7e-05	-0.087
RSVQWCAVSQPEATK	4	18	R	C	0.997	Carbamidomethyl (+57)	1745.85	3	-0.0016	-0.89
RSVQWCAVSQPEATK	4	18	R	C	0.997	Carbamidomethyl (+57)	1745.85	3	-0.0013	-0.72
RSVQWCAVSQPEATK	4	18	R	C	0.997	Carbamidomethyl (+57)	1745.85	3	-0.0013	-0.72
RSVQWCAVSQPEATK	4	18	R	C	0.997	Carbamidomethyl (+57)	1745.85	3	-6.3e-05	-0.036
RSVQWCAVSQPEATK	4	18	R	C	0.997	Carbamidomethyl (+57)	1745.85	2	-0.0017	-0.97
RSVQWCAVSQPEATK	4	18	R	C	0.997	Carbamidomethyl (+57)	1745.85	3	-6.3e-05	-0.036
RSVQWCAVSQPEATK	4	18	R	C	0.997	Carbamidomethyl (+57)	1745.85	2	-0.0011	-0.62
RSVQWCAVSQPEATK	4	18	R	C	0.997	Carbamidomethyl (+57)	1745.85	3	-0.0013	-0.72
RSVQWCAVSQPEATK	4	18	R	C	0.95	Carbamidomethyl (+57)	1745.85	2	0.00091	0.52
RSVQWCAVSQPEATK	4	18	R	C	0.997	Phospho (+80), Carbamidomethyl (+57)	1825.82	2	-0.0016	-0.89
RSVQWCAVSQPEATK	4	18	R	C	0.997	Carbamidomethyl (+57)	1745.85	3	-0.0028	-1.6
RSVQWCAVSQPEATK	4	18	R	C	0.997	Phospho (+80), Carbamidomethyl (+57)	1825.82	3	-0.00019	-0.11
RSVQWCAVSQPEATK	4	18	R	C	0.997	Carbamidomethyl (+57)	1745.85	3	-6.3e-05	-0.036
RSVQWCAVSQPEATK	4	18	R	C	0.997	Carbamidomethyl (+57)	1745.85	3	-0.0043	-2.4
RSVQWCAVSQPEATKCFQWQR	4	24	R	N	0.997	Carbamidomethyl (+57), Carbamidomethyl (+57)	2651.25	3	-0.0021	-0.8
RSVQWCAVSQPEATKCFQWQR	4	24	R	N	0.997	Carbamidomethyl (+57), Carbamidomethyl (+57)	2651.25	4	0.0003	0.11
SVQWCAVSQPEAT	5	17	R	K	0.997	Carbamidomethyl (+57)	1461.66	2	0.0016	1.1
SVQWCAVSQPEATK	5	18	R	C	0.959	Carbamidomethyl (+57)	1589.75	2	-0.0058	-3.6
SVQWCAVSQPEATK	5	18	R	C	0.98	Carbamidomethyl (+57)	1589.75	2	-0.0046	-2.9
SVQWCAVSQPEATK	5	18	R	C	0.997	Carbamidomethyl (+57)	1589.75	3	-0.0019	-1.2
SVQWCAVSQPEATK	5	18	R	C	0.997	Carbamidomethyl (+57)	1589.75	2	0.0028	1.8
SVQWCAVSQPEATK	5	18	R	C	0.997	Carbamidomethyl (+57)	1589.75	2	-0.0032	-2
SVQWCAVSQPEATK	5	18	R	C	0.997	Carbamidomethyl (+57)	1589.75	2	-0.0032	-2
SVQWCAVSQPEATK	5	18	R	C	0.997	Deamidated (+1), Carbamidomethyl (+57)	1590.74	2	0.004	2.5
SVQWCAVSQPEATK	5	18	R	C	0.997	Carbamidomethyl (+57)	1589.75	2	-0.00019	-0.12
SVQWCAVSQPEATK	5	18	R	C	0.997	Carbamidomethyl (+57)	1589.74	2	-0.0062	-3.9
SVQWCAVSQPEATK	5	18	R	C	0.997	Carbamidomethyl (+57)	1589.75	2	-0.0014	-0.87
SVQWCAVSQPEATK	5	18	R	C	0.997	Carbamidomethyl (+57)	1589.75	2	-0.0012	-0.75
SVQWCAVSQPEATK	5	18	R	C	0.997	Carbamidomethyl (+57)	1589.75	2	-0.00039	-0.24
SVQWCAVSQPEATK	5	18	R	C	0.945	Deamidated (+1), Carbamidomethyl (+57)	1590.75	2	0.014	8.9
SVQWCAVSQPEATK	5	18	R	C	0.995	Phospho (+80), Carbamidomethyl (+57)	1669.71	2	-0.0035	-2.1
SVQWCAVSQPEATK	5	18	R	C	0.996	Carbamidomethyl (+57)	1589.75	2	-0.00019	-0.12
SVQWCAVSQPEATK	5	18	R	C	0.997	Carbamidomethyl (+57)	1589.75	3	0.0011	0.71
SVQWCAVSQPEATK	5	18	R	C	0.997	Carbamidomethyl (+57)	1589.75	2	-0.00079	-0.49
SVQWCAVSQPEATK	5	18	R	C	0.997	Deamidated (+1), Carbamidomethyl (+57)	1590.74	2	0.001	0.63
SVQWCAVSQPEATK	5	18	R	C	0.997	Carbamidomethyl (+57)	1589.75	2	-0.002	-1.2
SVQWCAVSQPEATK	5	18	R	C	0.997	Phospho (+80), Carbamidomethyl (+57)	1669.72	2	-0.0019	-1.1
SVQWCAVSQPEATK	5	18	R	C	0.997	Carbamidomethyl (+57)	1589.75	2	-0.0024	-1.5
SVQWCAVSQPEATK	5	18	R	C	0.997	Carbamidomethyl (+57)	1589.75	2	0.00081	0.51
SVQWCAVSQPEATK	5	18	R	C	0.997	Phospho (+80), Carbamidomethyl (+57)	1669.72	2	0.0015	0.89
SVQWCAVSQPEATK	5	18	R	C	0.997	Carbamidomethyl (+57)	1589.75	3	0.00024	0.15
SVQWCAVSQPEATK	5	18	R	C	0.997	Carbamidomethyl (+57)	1589.75	2	-0.0024	-1.5
SVQWCAVSQPEATK	5	18	R	C	0.997	Carbamidomethyl (+57)	1589.75	2	-0.0014	-0.87
SVQWCAVSQPEATK	5	18	R	C	0.997	Carbamidomethyl (+57)	1589.75	2	0.00081	0.51
SVQWCAVSQPEATK	5	18	R	C	0.997	Carbamidomethyl (+57)	1589.75	2	-0.0012	-0.75
SVQWCAVSQPEATK	5	18	R	C	0.997	Carbamidomethyl (+57)	1589.74	2	-0.0086	-5.4
SVQWCAVSQPEATKCFQWQR	5	24	R	N	0.997	Carbamidomethyl (+57), Carbamidomethyl (+57)	2495.15	3	-0.0024	-0.97
SVQWCAVSQPEATKCFQWQR	5	24	R	N	0.976	Carbamidomethyl (+57), Carbamidomethyl (+57)	2495.14	3	-0.0069	-2.8
QWCAVSQPEAT	7	17	V	K	0.983	Carbamidomethyl (+57)	1275.56	2	1.3e-05	0.0099
WCAVSQPEATKCF	8	20	Q	Q	0.997	Carbamidomethyl (+57), Carbamidomethyl (+57)	1582.69	2	0.0011	0.72
WCAVSQPEATKCF	8	20	Q	Q	0.997	Carbamidomethyl (+57), Carbamidomethyl (+57)	1582.69	2	0.0011	0.72
WCAVSQPEATKCF	8	20	Q	Q	0.997	Carbamidomethyl (+57), Carbamidomethyl (+57)	1582.69	2	-0.0011	-0.66
CAVSQPEATK	9	18	W	C	0.997	Carbamidomethyl (+57)	1089.51	2	-0.00069	-0.63
CAVSQPEATK	9	18	W	C	0.997	Carbamidomethyl (+57)	1089.51	2	-8.7e-05	-0.08
CAVSQPEATK	9	18	W	C	0.997	Carbamidomethyl (+57)	1089.51	2	0.00011	0.1
CAVSQPEATKCF	9	20	W	Q	0.953	Carbamidomethyl (+57), Carbamidomethyl (+57)	1396.61	2	-0.00055	-0.4
CAVSQPEATKCF	9	20	W	Q	0.995	Carbamidomethyl (+57), Deamidated (+1), Carbamidomethyl (+57)	1397.6	2	0.00023	0.17
CAVSQPEATKCF	9	20	W	Q	0.997	Carbamidomethyl (+57), Carbamidomethyl (+57)	1396.61	2	-0.0016	-1.1
CAVSQPEATKCF	9	20	W	Q	0.997	Carbamidomethyl (+57), Deamidated (+1), Carbamidomethyl (+57)	1397.6	2	0.0022	1.6
CAVSQPEATKCF	9	20	W	Q	0.997	Carbamidomethyl (+57), Carbamidomethyl (+57)	1396.61	2	-0.00035	-0.25
CAVSQPEATKCF	9	20	W	Q	0.997	Carbamidomethyl (+57), Carbamidomethyl (+57)	1396.61	2	-0.00095	-0.68
CAVSQPEATKCF	9	20	W	Q	0.997	Carbamidomethyl (+57), Carbamidomethyl (+57)	1396.61	2	0.0012	0.89
CAVSQPEATKCF	9	20	W	Q	0.997	Carbamidomethyl (+57), Deamidated (+1), Carbamidomethyl (+57)	1397.6	2	0.0026	1.9
CAVSQPEATKCF	9	20	W	Q	0.997	Carbamidomethyl (+57), Carbamidomethyl (+57)	1396.61	2	0.00045	0.32
CAVSQPEATKCF	9	20	W	Q	0.997	Carbamidomethyl (+57), Carbamidomethyl (+57)	1396.61	2	-0.0014	-0.97
CAVSQPEATKCF	9	20	W	Q	0.986	Carbamidomethyl (+57), Deamidated (+1), Carbamidomethyl (+57)	1397.6	2	0.00023	0.17
CAVSQPEATKCF	9	20	W	Q	0.995	Carbamidomethyl (+57), Deamidated (+1), Carbamidomethyl (+57)	1397.6	2	0.001	0.74
CAVSQPEATKCF	9	20	W	Q	0.997	Carbamidomethyl (+57), Carbamidomethyl (+57)	1396.61	2	-0.0022	-1.5
CAVSQPEATKCF	9	20	W	Q	0.997	Carbamidomethyl (+57), Deamidated (+1), Carbamidomethyl (+57)	1397.6	2	-0.00017	-0.12
CAVSQPEATKCF	9	20	W	Q	0.997	Carbamidomethyl (+57), Carbamidomethyl (+57)	1396.61	2	0.002	1.5
CAVSQPEATKCF	9	20	W	Q	0.997	Carbamidomethyl (+57), Deamidated (+1), Carbamidomethyl (+57)	1397.6	2	0.0044	3.2
CAVSQPEATKCF	9	20	W	Q	0.997	Carbamidomethyl (+57), Carbamidomethyl (+57)	1396.61	2	-0.00075	-0.54
CAVSQPEATKCF	9	20	W	Q	0.997	Carbamidomethyl (+57), Carbamidomethyl (+57)	1396.61	2	-0.0048	-3.4
CAVSQPEATKCF	9	20	W	Q	0.997	Carbamidomethyl (+57), Carbamidomethyl (+57)	1396.61	2	-0.0016	-1.1
CAVSQPEATKCF	9	20	W	Q	0.997	Carbamidomethyl (+57), Carbamidomethyl (+57)	1396.61	2	0.00065	0.46
CAVSQPEATKCFQW	9	22	W	Q	0.997	Carbamidomethyl (+57), Carbamidomethyl (+57)	1710.75	2	-0.0027	-1.5
AVSQPEATKCF	10	20	C	Q	0.997	Carbamidomethyl (+57)	1236.58	2	-0.0019	-1.5
AVSQPEATKCF	10	20	C	Q	0.997	Carbamidomethyl (+57)	1236.58	2	-0.0025	-2
VSQPEATKCF	11	20	A	Q	0.996	Carbamidomethyl (+57)	1165.54	2	-0.00039	-0.33
SQPEATKCF	12	20	V	Q	0.981	Carbamidomethyl (+57)	1066.48	2	-0.00019	-0.18
TKCFQWQR	17	24	A	N	0.99	Carbamidomethyl (+57)	1152.55	3	3.7e-05	0.032
TKCFQWQR	17	24	A	N	0.99	Carbamidomethyl (+57)	1152.55	3	-0.00056	-0.49
TKCFQWQRN	17	25	A	M	0.997	Carbamidomethyl (+57)	1266.59	3	-0.00026	-0.21
KCFQWQRN	18	25	T	M	0.946	Carbamidomethyl (+57)	1165.54	2	-0.0019	-1.6
KCFQWQRN	18	25	T	M	0.97	Carbamidomethyl (+57)	1165.55	3	-6.3e-05	-0.054
KCFQWQRN	18	25	T	M	0.99	Carbamidomethyl (+57)	1165.55	3	0.00024	0.2
KCFQWQRN	18	25	T	M	0.99	Carbamidomethyl (+57)	1165.55	2	-8.7e-05	-0.075
KCFQWQRN	18	25	T	M	0.947	Carbamidomethyl (+57)	1165.54	3	-0.00036	-0.31
KCFQWQRN	18	25	T	M	0.99	Carbamidomethyl (+57)	1165.55	3	-6.3e-05	-0.054
KCFQWQRN	18	25	T	M	0.99	Carbamidomethyl (+57)	1165.55	2	-8.7e-05	-0.075
KCFQWQRNM	18	26	T	R	0.988	Carbamidomethyl (+57)	1296.59	3	0.00034	0.26
KCFQWQRNM	18	26	T	R	0.993	Carbamidomethyl (+57)	1296.59	3	0.00034	0.26
KCFQWQRNMR	18	27	T	K	0.986	Carbamidomethyl (+57), Oxidation (+16)	1468.68	2	-0.0002	-0.14
KCFQWQRNMR	18	27	T	K	0.997	Carbamidomethyl (+57)	1452.69	3	0.00034	0.23
KCFQWQRNMR	18	27	T	K	0.997	Carbamidomethyl (+57)	1452.69	4	0.00016	0.11
KCFQWQRNMR	18	27	T	K	0.997	Carbamidomethyl (+57)	1452.69	2	0.00031	0.22
KCFQWQRNMR	18	27	T	K	0.997	Carbamidomethyl (+57)	1452.69	3	0.00034	0.23
KCFQWQRNMR	18	27	T	K	0.993	Carbamidomethyl (+57)	1452.69	2	0.0019	1.3
KCFQWQRNMR	18	27	T	K	0.997	Carbamidomethyl (+57)	1452.69	3	0.00034	0.23
KCFQWQRNMR	18	27	T	K	0.997	Carbamidomethyl (+57)	1452.69	3	3.7e-05	0.025
KCFQWQRNMR	18	27	T	K	0.997	Carbamidomethyl (+57)	1452.69	4	0.0018	1.2
KCFQWQRNMRK	18	28	T	V	0.987	Carbamidomethyl (+57)	1580.78	4	0.00076	0.48
KCFQWQRNMRK	18	28	T	V	0.994	Carbamidomethyl (+57)	1580.78	3	0.00054	0.34
KCFQWQRNMRKV	18	29	T	R	0.957	Carbamidomethyl (+57), Deamidated (+1)	1680.83	3	-0.00038	-0.23
KCFQWQRNMRKV	18	29	T	R	0.963	Carbamidomethyl (+57), Oxidation (+16)	1695.84	2	-0.0028	-1.7
KCFQWQRNMRKV	18	29	T	R	0.994	Carbamidomethyl (+57), Deamidated (+1)	1680.83	4	-5.5e-05	-0.033
KCFQWQRNMRKV	18	29	T	R	0.997	Carbamidomethyl (+57)	1679.85	4	0.00076	0.45
KCFQWQRNMRKV	18	29	T	R	0.997	Carbamidomethyl (+57)	1679.85	2	0.00071	0.42
KCFQWQRNMRKV	18	29	T	R	0.997	Carbamidomethyl (+57)	1679.85	4	-3.9e-05	-0.023
KCFQWQRNMRKV	18	29	T	R	0.997	Carbamidomethyl (+57)	1679.85	3	-6.3e-05	-0.038
KCFQWQRNMRKV	18	29	T	R	0.961	Carbamidomethyl (+57), Deamidated (+1)	1680.83	3	-0.00038	-0.23
KCFQWQRNMRKV	18	29	T	R	0.984	Carbamidomethyl (+57)	1679.85	2	0.0011	0.66
KCFQWQRNMRKV	18	29	T	R	0.985	Carbamidomethyl (+57), Oxidation (+16)	1695.84	3	-0.0026	-1.5
KCFQWQRNMRKV	18	29	T	R	0.994	Carbamidomethyl (+57)	1679.85	3	-0.0037	-2.2
KCFQWQRNMRKV	18	29	T	R	0.997	Carbamidomethyl (+57)	1679.85	4	-3.9e-05	-0.023
KCFQWQRNMRKV	18	29	T	R	0.997	Carbamidomethyl (+57), Deamidated (+1)	1680.83	4	-0.0013	-0.75
KCFQWQRNMRKV	18	29	T	R	0.997	Carbamidomethyl (+57)	1679.85	4	-3.9e-05	-0.023
KCFQWQRNMRKV	18	29	T	R	0.997	Carbamidomethyl (+57)	1679.85	3	-6.3e-05	-0.038
CFQWQRNMR	19	27	K	K	0.997	Carbamidomethyl (+57)	1324.59	3	-0.00016	-0.12
CFQWQRNMR	19	27	K	K	0.997	Carbamidomethyl (+57)	1324.59	2	0.0011	0.84
CFQWQRNMR	19	27	K	K	0.977	Carbamidomethyl (+57), Deamidated (+1)	1325.58	3	0.00042	0.32
CFQWQRNMR	19	27	K	K	0.994	Carbamidomethyl (+57), Deamidated (+1)	1325.57	3	-0.0011	-0.81
CFQWQRNMR	19	27	K	K	0.997	Carbamidomethyl (+57)	1324.59	3	-0.00016	-0.12
CFQWQRNMRKV	19	29	K	R	0.997	Carbamidomethyl (+57)	1551.75	3	-0.0018	-1.1
CFQWQRNMRKV	19	29	K	R	0.997	Carbamidomethyl (+57)	1551.75	4	-0.00064	-0.41
FQWQRNMR	20	27	C	K	0.978		1164.56	3	2e-06	0.0017
FQWQRNMR	20	27	C	K	0.99		1164.56	3	-0.0003	-0.26
FQWQRNMR	20	27	C	K	0.99		1164.56	2	-0.00022	-0.19
FQWQRNMRKV	20	29	C	R	0.968		1391.72	2	0.00018	0.13
FQWQRNMRKV	20	29	C	R	0.994		1391.72	3	-0.0004	-0.29
FQWQRNMRKV	20	29	C	R	0.995		1391.72	3	-0.001	-0.72
QWQRNMRKV	21	29	F	R	0.997		1244.65	3	-0.0016	-1.3
QWQRNMRKV	21	29	F	R	0.997		1244.66	2	0.00018	0.14
NMRKVRGPPVS	25	35	R	C	0.966		1239.69	2	0.0018	1.4
MRKVRGPPVS	26	35	N	C	0.988		1125.64	2	0.00028	0.25
RKVRGPPVSC	27	36	M	I	0.994	Carbamidomethyl (+57)	1154.63	3	-0.0015	-1.3
RKVRGPPVSC	27	36	M	I	0.947	Carbamidomethyl (+57)	1154.63	2	0.00011	0.098
RKVRGPPVSCI	27	37	M	K	0.981	Carbamidomethyl (+57)	1267.72	2	-0.00039	-0.31
RKVRGPPVSCI	27	37	M	K	0.965	Carbamidomethyl (+57)	1267.72	3	3.7e-05	0.029
RKVRGPPVSCI	27	37	M	K	0.99	Carbamidomethyl (+57)	1267.72	2	-0.00079	-0.62
RKVRGPPVSCIKR	27	39	M	D	0.997	Carbamidomethyl (+57)	1551.91	5	-0.00092	-0.59
RKVRGPPVSCIKR	27	39	M	D	0.997	Carbamidomethyl (+57)	1551.91	4	-0.00084	-0.54
RKVRGPPVSCIKR	27	39	M	D	0.997	Carbamidomethyl (+57)	1551.91	3	-0.00096	-0.62
RKVRGPPVSCIKR	27	39	M	D	0.993	Carbamidomethyl (+57)	1551.91	2	-0.0021	-1.3
RKVRGPPVSCIKR	27	39	M	D	0.995	Carbamidomethyl (+57)	1551.91	4	-0.0016	-1.1
RKVRGPPVSCIKR	27	39	M	D	0.997	Carbamidomethyl (+57)	1551.91	3	-0.00036	-0.23
RKVRGPPVSCIKRD	27	40	M	S	0.994	Carbamidomethyl (+57)	1666.94	5	-0.00042	-0.25
RKVRGPPVSCIKRDSPI	27	43	M	Q	0.967	Carbamidomethyl (+57)	1964.11	3	-0.0029	-1.5
RKVRGPPVSCIKRDSPI	27	43	M	Q	0.997	Carbamidomethyl (+57)	1964.12	4	0.0057	2.9
RKVRGPPVSCIKRDSPIQ	27	44	M	C	0.972	Carbamidomethyl (+57)	2092.17	3	-0.00016	-0.078
RKVRGPPVSCIKRDSPIQC	27	45	M	I	0.997	Carbamidomethyl (+57), Carbamidomethyl (+57)	2252.2	3	-0.00063	-0.28
RKVRGPPVSCIKRDSPIQCIQ	27	47	M	A	0.996	Carbamidomethyl (+57), Carbamidomethyl (+57)	2493.34	3	-0.0039	-1.6
RKVRGPPVSCIKRDSPIQCIQ	27	47	M	A	0.997	Carbamidomethyl (+57), Carbamidomethyl (+57)	2493.34	3	-2.9e-05	-0.011
RKVRGPPVSCIKRDSPIQCIQ	27	47	M	A	0.994	Carbamidomethyl (+57), Carbamidomethyl (+57)	2493.34	3	-0.0027	-1.1
RKVRGPPVSCIKRDSPIQCIQ	27	47	M	A	0.995	Carbamidomethyl (+57), Carbamidomethyl (+57)	2493.34	3	-0.0027	-1.1
RKVRGPPVSCIKRDSPIQCIQAIAENRADAVTL	27	59	M	D	0.997	Carbamidomethyl (+57), Carbamidomethyl (+57)	3718.01	3	0.021	5.8
RKVRGPPVSCIKRDSPIQCIQAIAENRADAVTL	27	59	M	D	0.997	Carbamidomethyl (+57), Carbamidomethyl (+57)	3717.99	4	-0.0014	-0.38
KVRGPPVS	28	35	R	C	0.949		838.5	2	-0.00072	-0.86
KVRGPPVS	28	35	R	C	0.969		838.5	2	7.8e-05	0.093
KVRGPPVSC	28	36	R	I	0.997	Carbamidomethyl (+57)	998.54	2	0.002	2
KVRGPPVSC	28	36	R	I	0.997	Carbamidomethyl (+57)	998.53	2	-0.0022	-2.2
KVRGPPVSC	28	36	R	I	0.997	Carbamidomethyl (+57)	998.53	2	1.3e-05	0.013
KVRGPPVSCI	28	37	R	K	0.992	Carbamidomethyl (+57)	1111.62	2	-0.00069	-0.62
KVRGPPVSCI	28	37	R	K	0.997	Carbamidomethyl (+57)	1111.62	2	-0.00069	-0.62
KVRGPPVSCIKRDSPIQ	28	44	R	C	0.997	Carbamidomethyl (+57)	1936.07	3	-0.0029	-1.5
KVRGPPVSCIKRDSPIQC	28	45	R	I	0.993	Carbamidomethyl (+57), Carbamidomethyl (+57)	2096.1	3	0.0012	0.56
KVRGPPVSCIKRDSPIQC	28	45	R	I	0.984	Carbamidomethyl (+57), Carbamidomethyl (+57)	2096.1	3	-0.0015	-0.73
KVRGPPVSCIKRDSPIQCIQAIAENR	28	53	R	A	0.997	Carbamidomethyl (+57), Carbamidomethyl (+57)	2991.58	5	-0.0071	-2.4
KVRGPPVSCIKRDSPIQCIQAIAENR	28	53	R	A	0.968	Carbamidomethyl (+57), Carbamidomethyl (+57)	2991.59	5	0.0019	0.64
KVRGPPVSCIKRDSPIQCIQAIAENRADAVTL	28	59	R	D	0.997	Carbamidomethyl (+57), Carbamidomethyl (+57)	3561.89	4	0.0025	0.7
VRGPPVSC	29	36	K	I	0.99	Carbamidomethyl (+57)	870.44	2	-0.00019	-0.21
VRGPPVSC	29	36	K	I	0.99	Carbamidomethyl (+57)	870.44	2	-0.0016	-1.8
VRGPPVSCI	29	37	K	K	0.996	Carbamidomethyl (+57)	983.52	2	-0.00029	-0.29
VRGPPVSCI	29	37	K	K	0.99	Carbamidomethyl (+57)	983.52	2	0.0023	2.3
VRGPPVSCI	29	37	K	K	0.997	Carbamidomethyl (+57)	983.52	2	0.0019	1.9
VRGPPVSCI	29	37	K	K	0.997	Carbamidomethyl (+57)	983.52	2	-0.0027	-2.7
VRGPPVSCI	29	37	K	K	0.98	Carbamidomethyl (+57)	983.52	2	0.0017	1.7
VRGPPVSCIK	29	38	K	R	0.992	Carbamidomethyl (+57)	1111.62	2	-0.0011	-0.98
VRGPPVSCIK	29	38	K	R	0.997	Carbamidomethyl (+57)	1111.62	2	-0.00049	-0.44
VRGPPVSCIK	29	38	K	R	0.96	Carbamidomethyl (+57)	1111.62	2	-0.00089	-0.8
VRGPPVSCIK	29	38	K	R	0.996	Carbamidomethyl (+57)	1111.62	2	-0.00069	-0.62
VRGPPVSCIKR	29	39	K	D	0.989	Carbamidomethyl (+57)	1267.72	3	-0.0012	-0.92
VRGPPVSCIKR	29	39	K	D	0.996	Carbamidomethyl (+57)	1267.72	3	-0.00056	-0.44
VRGPPVSCIKR	29	39	K	D	0.997	Carbamidomethyl (+57)	1267.72	2	-0.0014	-1.1
VRGPPVSCIKR	29	39	K	D	0.997	Carbamidomethyl (+57)	1267.72	4	6.1e-05	0.048
VRGPPVSCIKR	29	39	K	D	0.997	Carbamidomethyl (+57)	1267.72	4	-0.0015	-1.2
VRGPPVSCIKR	29	39	K	D	0.997	Carbamidomethyl (+57)	1267.72	3	-0.00026	-0.21
VRGPPVSCIKR	29	39	K	D	0.989	Carbamidomethyl (+57)	1267.72	2	0.00021	0.17
VRGPPVSCIKR	29	39	K	D	0.997	Carbamidomethyl (+57)	1267.72	3	3.7e-05	0.029
VRGPPVSCIKR	29	39	K	D	0.997	Carbamidomethyl (+57)	1267.72	4	6.1e-05	0.048
VRGPPVSCIKR	29	39	K	D	0.997	Carbamidomethyl (+57)	1267.72	2	-0.00099	-0.78
VRGPPVSCIKR	29	39	K	D	0.997	Carbamidomethyl (+57)	1267.72	4	-0.00034	-0.27
VRGPPVSCIKR	29	39	K	D	0.997	Carbamidomethyl (+57)	1267.72	3	-0.0012	-0.92
VRGPPVSCIKR	29	39	K	D	0.997	Carbamidomethyl (+57)	1267.72	3	-0.00086	-0.68
VRGPPVSCIKR	29	39	K	D	0.997	Carbamidomethyl (+57)	1267.72	3	-0.00026	-0.21
VRGPPVSCIKRDSPIQ	29	44	K	C	0.99	Carbamidomethyl (+57)	1807.97	4	-0.00044	-0.24
VRGPPVSCIKRDSPIQ	29	44	K	C	0.997	Carbamidomethyl (+57)	1807.97	3	-0.00066	-0.37
VRGPPVSCIKRDSPIQ	29	44	K	C	0.992	Carbamidomethyl (+57)	1807.97	4	-3.9e-05	-0.022
VRGPPVSCIKRDSPIQ	29	44	K	C	0.997	Carbamidomethyl (+57)	1807.97	3	0.00084	0.46
VRGPPVSCIKRDSPIQC	29	45	K	I	0.956	Carbamidomethyl (+57), Carbamidomethyl (+57)	1968	2	-0.0074	-3.7
VRGPPVSCIKRDSPIQC	29	45	K	I	0.978	Carbamidomethyl (+57), Carbamidomethyl (+57)	1968.01	3	0.0037	1.9
VRGPPVSCIKRDSPIQC	29	45	K	I	0.997	Carbamidomethyl (+57), Carbamidomethyl (+57)	1968	4	-0.0003	-0.15
VRGPPVSCIKRDSPIQC	29	45	K	I	0.997	Carbamidomethyl (+57), Carbamidomethyl (+57)	1968.01	3	0.0022	1.1
VRGPPVSCIKRDSPIQCIQ	29	47	K	A	0.947	Carbamidomethyl (+57), Carbamidomethyl (+57)	2209.15	4	0.003	1.4
RGPPVSCI	30	37	V	K	0.99	Carbamidomethyl (+57)	884.45	2	-0.00029	-0.32
RGPPVSCI	30	37	V	K	0.99	Carbamidomethyl (+57)	884.45	2	-8.7e-05	-0.099
RGPPVSCIKRDSPI	30	43	V	Q	0.997	Carbamidomethyl (+57)	1580.84	3	-0.0016	-0.99
RGPPVSCIKRDSPI	30	43	V	Q	0.997	Carbamidomethyl (+57)	1580.85	3	-0.00066	-0.42
RGPPVSCIKRDSPI	30	43	V	Q	0.997	Carbamidomethyl (+57)	1580.85	3	0.0011	0.72
RGPPVSCIKRDSPIQCIQAIAENRADAVTL	30	59	V	D	0.975	Carbamidomethyl (+57), Carbamidomethyl (+57)	3334.72	4	-0.0005	-0.15
RGPPVSCIKRDSPIQCIQAIAENRADAVTL	30	59	V	D	0.997	Carbamidomethyl (+57), Carbamidomethyl (+57)	3334.72	4	-0.0021	-0.63
RGPPVSCIKRDSPIQCIQAIAENRADAVTLDGGFIYEAGLAPYKLRPV	30	77	V	A	0.987	Carbamidomethyl (+57), Carbamidomethyl (+57)	5281.76	7	0.0093	1.8
RGPPVSCIKRDSPIQCIQAIAENRADAVTLDGGFIYEAGLAPYKLRPV	30	77	V	A	0.997	Carbamidomethyl (+57), Carbamidomethyl (+57)	5281.75	6	0.0046	0.88
GPPVSCIK	31	38	R	R	0.99	Carbamidomethyl (+57)	856.45	2	-0.0018	-2.1
GPPVSCIK	31	38	R	R	0.99	Carbamidomethyl (+57)	856.45	2	0.00021	0.25
GPPVSCIK	31	38	R	R	0.986	Carbamidomethyl (+57)	856.45	2	-0.00039	-0.45
GPPVSCIK	31	38	R	R	0.99	Carbamidomethyl (+57)	856.45	2	-0.00039	-0.45
GPPVSCIK	31	38	R	R	0.99	Carbamidomethyl (+57)	856.45	2	-0.0012	-1.4
GPPVSCIK	31	38	R	R	0.99	Carbamidomethyl (+57)	856.45	2	0.00041	0.48
GPPVSCIKR	31	39	R	D	0.997	Carbamidomethyl (+57)	1012.55	3	-0.00026	-0.26
GPPVSCIKR	31	39	R	D	0.997	Carbamidomethyl (+57)	1012.55	3	3.7e-05	0.036
GPPVSCIKR	31	39	R	D	0.997	Carbamidomethyl (+57)	1012.55	2	-0.00089	-0.88
GPPVSCIKR	31	39	R	D	0.997	Carbamidomethyl (+57)	1012.55	2	0.0013	1.3
GPPVSCIKR	31	39	R	D	0.997	Carbamidomethyl (+57)	1012.55	3	0.00034	0.33
GPPVSCIKR	31	39	R	D	0.997	Carbamidomethyl (+57)	1012.55	2	-0.00029	-0.28
GPPVSCIKR	31	39	R	D	0.985	Carbamidomethyl (+57)	1012.55	3	-0.00056	-0.56
GPPVSCIKR	31	39	R	D	0.997	Carbamidomethyl (+57)	1012.55	3	0.00034	0.33
GPPVSCIKR	31	39	R	D	0.997	Carbamidomethyl (+57)	1012.55	2	-0.00029	-0.28
GPPVSCIKR	31	39	R	D	0.997	Carbamidomethyl (+57)	1012.55	3	-0.00086	-0.85
GPPVSCIKR	31	39	R	D	0.997	Carbamidomethyl (+57)	1012.55	3	0.00034	0.33
GPPVSCIKR	31	39	R	D	0.997	Carbamidomethyl (+57)	1012.55	3	0.00094	0.92
GPPVSCIKR	31	39	R	D	0.997	Carbamidomethyl (+57)	1012.55	2	-0.00029	-0.28
GPPVSCIKRDSPIQC	31	45	R	I	0.975	Carbamidomethyl (+57), Carbamidomethyl (+57)	1712.83	2	-0.0013	-0.73
GPPVSCIKRDSPIQC	31	45	R	I	0.991	Carbamidomethyl (+57), Carbamidomethyl (+57)	1712.83	3	-0.0014	-0.83
GPPVSCIKRDSPIQCIQ	31	47	R	A	0.992	Carbamidomethyl (+57), Carbamidomethyl (+57)	1953.98	3	-0.0014	-0.73
GPPVSCIKRDSPIQCIQ	31	47	R	A	0.997	Carbamidomethyl (+57), Carbamidomethyl (+57)	1953.97	3	-0.002	-1
GPPVSCIKRDSPIQCIQ	31	47	R	A	0.988	Carbamidomethyl (+57), Carbamidomethyl (+57)	1953.98	3	-0.00083	-0.42
GPPVSCIKRDSPIQCIQ	31	47	R	A	0.997	Carbamidomethyl (+57), Carbamidomethyl (+57)	1953.98	2	-0.0012	-0.59
GPPVSCIKRDSPIQCIQ	31	47	R	A	0.997	Carbamidomethyl (+57), Carbamidomethyl (+57)	1953.97	2	-0.002	-1
GPPVSCIKRDSPIQCIQAIAEN	31	52	R	R	0.995	Carbamidomethyl (+57), Carbamidomethyl (+57)	2452.22	3	0.0014	0.56
GPPVSCIKRDSPIQCIQAIAEN	31	52	R	R	0.995	Carbamidomethyl (+57), Carbamidomethyl (+57)	2452.22	3	0.0017	0.68
GPPVSCIKRDSPIQCIQAIAENRADAVTL	31	59	R	D	0.997	Carbamidomethyl (+57), Carbamidomethyl (+57)	3178.63	3	0.0051	1.6
SCIKRDSPIQCI	35	46	V	Q	0.992	Carbamidomethyl (+57), Carbamidomethyl (+57)	1475.72	3	-0.0046	-3.1
SCIKRDSPIQCIQ	35	47	V	A	0.983	Carbamidomethyl (+57), Carbamidomethyl (+57)	1603.78	3	-0.00043	-0.27
SCIKRDSPIQCIQ	35	47	V	A	0.953	Carbamidomethyl (+57), Carbamidomethyl (+57)	1603.78	3	-0.00043	-0.27
CIKRDSPI	36	43	S	Q	0.99	Carbamidomethyl (+57)	987.52	2	-8.7e-05	-0.088
CIKRDSPI	36	43	S	Q	0.99	Carbamidomethyl (+57)	987.52	2	-0.00049	-0.49
CIKRDSPIQ	36	44	S	C	0.997	Carbamidomethyl (+57)	1115.58	2	-0.00029	-0.26
CIKRDSPIQC	36	45	S	I	0.997	Carbamidomethyl (+57), Carbamidomethyl (+57)	1275.61	3	-0.00053	-0.41
CIKRDSPIQC	36	45	S	I	0.997	Carbamidomethyl (+57), Carbamidomethyl (+57)	1275.61	2	0.00045	0.35
CIKRDSPIQC	36	45	S	I	0.997	Carbamidomethyl (+57), Carbamidomethyl (+57)	1275.61	2	0.00045	0.35
CIKRDSPIQCI	36	46	S	Q	0.979	Carbamidomethyl (+57), Carbamidomethyl (+57)	1388.68	2	-0.012	-9
CIKRDSPIQCIQ	36	47	S	A	0.979	Carbamidomethyl (+57), Carbamidomethyl (+57)	1516.75	3	-0.0011	-0.74
CIKRDSPIQCIQ	36	47	S	A	0.992	Carbamidomethyl (+57), Carbamidomethyl (+57)	1516.75	3	-0.00083	-0.55
CIKRDSPIQCIQ	36	47	S	A	0.997	Carbamidomethyl (+57), Carbamidomethyl (+57)	1516.75	2	-0.0019	-1.2
CIKRDSPIQCIQAIAENRADAVTL	36	59	S	D	0.992	Carbamidomethyl (+57), Carbamidomethyl (+57)	2741.4	4	0.0017	0.62
CIKRDSPIQCIQAIAENRADAVTL	36	59	S	D	0.997	Carbamidomethyl (+57), Carbamidomethyl (+57)	2741.4	3	-2.9e-05	-0.01
CIKRDSPIQCIQAIAENRADAVTL	36	59	S	D	0.991	Carbamidomethyl (+57), Carbamidomethyl (+57)	2741.4	3	-0.00033	-0.12
CIKRDSPIQCIQAIAENRADAVTL	36	59	S	D	0.997	Carbamidomethyl (+57), Carbamidomethyl (+57)	2741.4	3	0.0018	0.65
IKRDSPIQ	37	44	C	C	0.946		955.55	2	-0.00022	-0.23
IKRDSPIQCIQ	37	47	C	A	0.98	Carbamidomethyl (+57)	1356.72	3	-6.3e-05	-0.047
IKRDSPIQCIQ	37	47	C	A	0.997	Carbamidomethyl (+57)	1356.72	2	0.00021	0.16
IKRDSPIQCIQ	37	47	C	A	0.991	Carbamidomethyl (+57)	1356.72	3	-6.3e-05	-0.047
IKRDSPIQCIQ	37	47	C	A	0.997	Carbamidomethyl (+57)	1356.72	2	-0.00019	-0.14
IKRDSPIQCIQAIAENRADAVTL	37	59	C	D	0.997	Carbamidomethyl (+57)	2581.37	4	0.002	0.76
IKRDSPIQCIQAIAENRADAVTL	37	59	C	D	0.954	Carbamidomethyl (+57), Deamidated (+1)	2582.37	3	0.017	6.7
IKRDSPIQCIQAIAENRADAVTL	37	59	C	D	0.995	Carbamidomethyl (+57)	2581.37	4	0.00076	0.29
IKRDSPIQCIQAIAENRADAVTL	37	59	C	D	0.997	Carbamidomethyl (+57)	2581.36	3	-0.0017	-0.64
IKRDSPIQCIQAIAENRADAVTLDGGFIY	37	65	C	E	0.994	Carbamidomethyl (+57)	3233.65	4	0.0042	1.3
KRDSPIQC	38	45	I	I	0.98	Carbamidomethyl (+57)	1002.49	3	-0.00036	-0.36
KRDSPIQC	38	45	I	I	0.99	Carbamidomethyl (+57)	1002.49	2	0.00021	0.21
KRDSPIQC	38	45	I	I	0.99	Carbamidomethyl (+57)	1002.49	3	0.00024	0.24
KRDSPIQC	38	45	I	I	0.99	Carbamidomethyl (+57)	1002.49	2	-0.00039	-0.39
KRDSPIQC	38	45	I	I	0.99	Carbamidomethyl (+57)	1002.49	2	-0.00019	-0.19
KRDSPIQCI	38	46	I	Q	0.977	Carbamidomethyl (+57)	1115.58	3	-0.00066	-0.59
KRDSPIQCI	38	46	I	Q	0.984	Carbamidomethyl (+57)	1115.58	3	-6.3e-05	-0.057
KRDSPIQCI	38	46	I	Q	0.994	Carbamidomethyl (+57)	1115.58	2	0.00031	0.28
KRDSPIQCI	38	46	I	Q	0.997	Carbamidomethyl (+57)	1115.58	2	-0.00069	-0.62
KRDSPIQCI	38	46	I	Q	0.997	Phospho (+80), Carbamidomethyl (+57)	1195.54	2	-0.00022	-0.18
KRDSPIQCI	38	46	I	Q	0.975	Carbamidomethyl (+57)	1115.58	3	-0.00036	-0.33
KRDSPIQCI	38	46	I	Q	0.981	Carbamidomethyl (+57)	1115.58	2	-0.00049	-0.44
KRDSPIQCI	38	46	I	Q	0.988	Carbamidomethyl (+57)	1115.57	2	-0.0013	-1.2
KRDSPIQCI	38	46	I	Q	0.99	Carbamidomethyl (+57)	1115.58	3	-0.00036	-0.33
KRDSPIQCI	38	46	I	Q	0.997	Carbamidomethyl (+57)	1115.58	2	-0.00049	-0.44
KRDSPIQCIQ	38	47	I	A	0.971	Carbamidomethyl (+57)	1243.63	3	-6.3e-05	-0.051
KRDSPIQCIQ	38	47	I	A	0.971	Carbamidomethyl (+57)	1243.63	3	-6.3e-05	-0.051
KRDSPIQCIQAI	38	49	I	A	0.982	Carbamidomethyl (+57)	1427.76	3	-0.00016	-0.11
KRDSPIQCIQAI	38	49	I	A	0.997	Carbamidomethyl (+57)	1427.75	3	-0.0011	-0.74
KRDSPIQCIQAIAEN	38	52	I	R	0.992	Carbamidomethyl (+57)	1741.88	3	0.0015	0.88
KRDSPIQCIQAIAENRADAV	38	57	I	T	0.995	Carbamidomethyl (+57)	2254.15	4	-0.00014	-0.062
KRDSPIQCIQAIAENRADAVTL	38	59	I	D	0.997	Carbamidomethyl (+57)	2468.28	4	0.0013	0.51
KRDSPIQCIQAIAENRADAVTL	38	59	I	D	0.997	Carbamidomethyl (+57)	2468.28	3	-0.002	-0.8
KRDSPIQCIQAIAENRADAVTL	38	59	I	D	0.997	Carbamidomethyl (+57)	2468.28	4	-0.00034	-0.14
KRDSPIQCIQAIAENRADAVTL	38	59	I	D	0.997	Carbamidomethyl (+57)	2468.28	3	-0.00076	-0.31
KRDSPIQCIQAIAENRADAVTLDGGFIYEAGLAPYKLRPV	38	77	I	A	0.997	Carbamidomethyl (+57)	4415.31	5	-0.00092	-0.21
KRDSPIQCIQAIAENRADAVTLDGGFIYEAGLAPYKLRPV	38	77	I	A	0.997	Carbamidomethyl (+57)	4416.31	6	1	230
KRDSPIQCIQAIAENRADAVTLDGGFIYEAGLAPYKLRPV	38	77	I	A	0.997	Carbamidomethyl (+57)	4415.32	5	0.014	3.1
KRDSPIQCIQAIAENRADAVTLDGGFIYEAGLAPYKLRPV	38	77	I	A	0.997	Carbamidomethyl (+57)	4415.31	6	0.006	1.4
KRDSPIQCIQAIAENRADAVTLDGGFIYEAGLAPYKLRPV	38	77	I	A	0.997	Carbamidomethyl (+57)	4415.31	5	0.0056	1.3
RDSPIQCIQ	39	47	K	A	0.99	Carbamidomethyl (+57)	1115.54	2	-0.00049	-0.44
RDSPIQCIQAIAEN	39	52	K	R	0.997	Carbamidomethyl (+57)	1613.78	2	-0.00069	-0.43
RDSPIQCIQAIAEN	39	52	K	R	0.997	Carbamidomethyl (+57)	1613.78	2	-0.0035	-2.2
RDSPIQCIQAIAENR	39	53	K	A	0.997	Carbamidomethyl (+57)	1769.88	3	0.00044	0.25
RDSPIQCIQAIAENR	39	53	K	A	0.997	Carbamidomethyl (+57)	1769.89	2	0.0024	1.4
RDSPIQCIQAIAENR	39	53	K	A	0.997	Carbamidomethyl (+57)	1769.88	3	-0.0026	-1.4
RDSPIQCIQAIAENR	39	53	K	A	0.997	Carbamidomethyl (+57)	1769.88	2	-0.00099	-0.56
RDSPIQCIQAIAENR	39	53	K	A	0.997	Carbamidomethyl (+57)	1769.88	3	-0.00046	-0.26
RDSPIQCIQAIAENR	39	53	K	A	0.986	Carbamidomethyl (+57)	1769.89	2	0.0068	3.8
RDSPIQCIQAIAENR	39	53	K	A	0.997	Carbamidomethyl (+57)	1769.88	3	0.00014	0.077
RDSPIQCIQAIAENR	39	53	K	A	0.997	Phospho (+80), Carbamidomethyl (+57)	1849.85	2	0.0025	1.3
RDSPIQCIQAIAENR	39	53	K	A	0.997	Phospho (+80), Carbamidomethyl (+57)	1849.85	2	0.0011	0.58
RDSPIQCIQAIAENR	39	53	K	A	0.997	Carbamidomethyl (+57)	1769.88	2	-0.0012	-0.67
RDSPIQCIQAIAENR	39	53	K	A	0.997	Carbamidomethyl (+57)	1769.88	3	-0.0011	-0.6
RDSPIQCIQAIAENR	39	53	K	A	0.997	Phospho (+80), Carbamidomethyl (+57)	1849.85	3	0.00031	0.16
RDSPIQCIQAIAENR	39	53	K	A	0.997	Carbamidomethyl (+57)	1769.88	2	-0.00039	-0.22
RDSPIQCIQAIAENR	39	53	K	A	0.997	Carbamidomethyl (+57)	1769.88	3	0.00014	0.077
RDSPIQCIQAIAENRADAVTL	39	59	K	D	0.997	Carbamidomethyl (+57)	2340.19	3	0.0029	1.3
DSPIQCIQ	40	47	R	A	0.982	Carbamidomethyl (+57)	959.44	2	-0.00039	-0.4
DSPIQCIQAIAEN	40	52	R	R	0.996	Carbamidomethyl (+57)	1457.68	2	0.001	0.69
DSPIQCIQAIAEN	40	52	R	R	0.997	Carbamidomethyl (+57)	1457.68	2	0.00041	0.28
DSPIQCIQAIAENR	40	53	R	A	0.992	Carbamidomethyl (+57)	1613.78	3	-0.00076	-0.47
DSPIQCIQAIAENR	40	53	R	A	0.996	Carbamidomethyl (+57)	1613.78	3	0.00014	0.085
DSPIQCIQAIAENR	40	53	R	A	0.997	Carbamidomethyl (+57)	1613.78	3	0.00014	0.085
DSPIQCIQAIAENR	40	53	R	A	0.997	Deamidated (+1), Carbamidomethyl (+57)	1614.77	2	0.0071	4.4
DSPIQCIQAIAENR	40	53	R	A	0.997	Carbamidomethyl (+57)	1613.78	2	0.00011	0.07
DSPIQCIQAIAENR	40	53	R	A	0.997	Deamidated (+1), Carbamidomethyl (+57)	1614.77	2	0.0021	1.3
DSPIQCIQAIAENR	40	53	R	A	0.997	Carbamidomethyl (+57), Deamidated (+1)	1614.77	3	0.001	0.63
DSPIQCIQAIAENR	40	53	R	A	0.997	Carbamidomethyl (+57)	1613.78	2	-0.0029	-1.8
DSPIQCIQAIAENR	40	53	R	A	0.997	Carbamidomethyl (+57)	1613.78	2	-0.0053	-3.3
DSPIQCIQAIAENR	40	53	R	A	0.997	Carbamidomethyl (+57)	1613.78	3	-0.00046	-0.29
DSPIQCIQAIAENR	40	53	R	A	0.997	Carbamidomethyl (+57)	1613.78	2	-0.00049	-0.3
DSPIQCIQAIAENR	40	53	R	A	0.997	Carbamidomethyl (+57)	1613.78	2	-0.0021	-1.3
DSPIQCIQAIAENR	40	53	R	A	0.997	Carbamidomethyl (+57)	1613.78	3	0.00074	0.46
DSPIQCIQAIAENR	40	53	R	A	0.997	Carbamidomethyl (+57)	1613.78	3	-0.0032	-2
DSPIQCIQAIAENR	40	53	R	A	0.997	Carbamidomethyl (+57)	1613.78	2	-0.00049	-0.3
DSPIQCIQAIAENR	40	53	R	A	0.997	Carbamidomethyl (+57)	1613.78	3	0.00014	0.085
DSPIQCIQAIAENR	40	53	R	A	0.997	Carbamidomethyl (+57)	1613.78	2	-0.00049	-0.3
DSPIQCIQAIAENR	40	53	R	A	0.972	Carbamidomethyl (+57)	1613.78	3	0.00074	0.46
DSPIQCIQAIAENR	40	53	R	A	0.997	Deamidated (+1), Carbamidomethyl (+57)	1614.77	2	0.0047	2.9
DSPIQCIQAIAENR	40	53	R	A	0.997	Carbamidomethyl (+57)	1613.78	2	-0.00049	-0.3
DSPIQCIQAIAENR	40	53	R	A	0.997	Carbamidomethyl (+57)	1613.78	3	0.0013	0.83
DSPIQCIQAIAENR	40	53	R	A	0.997	Carbamidomethyl (+57)	1613.78	2	-0.00069	-0.43
DSPIQCIQAIAENR	40	53	R	A	0.997	Carbamidomethyl (+57)	1613.78	2	-0.00069	-0.43
DSPIQCIQAIAENR	40	53	R	A	0.997	Carbamidomethyl (+57)	1613.79	3	0.0019	1.2
DSPIQCIQAIAENR	40	53	R	A	0.997	Carbamidomethyl (+57)	1613.78	2	-8.7e-05	-0.054
DSPIQCIQAIAENR	40	53	R	A	0.997	Carbamidomethyl (+57)	1613.78	3	-0.0011	-0.66
DSPIQCIQAIAENR	40	53	R	A	0.997	Carbamidomethyl (+57)	1613.78	2	-0.00069	-0.43
DSPIQCIQAIAENR	40	53	R	A	0.997	Carbamidomethyl (+57), Deamidated (+1)	1614.77	2	-0.0005	-0.31
DSPIQCIQAIAENR	40	53	R	A	0.997	Carbamidomethyl (+57), Deamidated (+1)	1614.77	2	0.0055	3.4
DSPIQCIQAIAENR	40	53	R	A	0.997	Carbamidomethyl (+57)	1613.78	3	0.00014	0.085
DSPIQCIQAIAENR	40	53	R	A	0.997	Carbamidomethyl (+57), Deamidated (+1)	1614.77	3	0.0052	3.2
DSPIQCIQAIAENR	40	53	R	A	0.997	Carbamidomethyl (+57), Deamidated (+1)	1614.77	2	-0.0009	-0.56
DSPIQCIQAIAENR	40	53	R	A	0.997	Carbamidomethyl (+57)	1613.78	2	-0.0011	-0.67
DSPIQCIQAIAENR	40	53	R	A	0.997	Carbamidomethyl (+57)	1613.78	3	0.00044	0.27
DSPIQCIQAIAENR	40	53	R	A	0.997	Carbamidomethyl (+57)	1613.78	2	-0.0017	-1
DSPIQCIQAIAENR	40	53	R	A	0.997	Carbamidomethyl (+57)	1613.78	3	0.00044	0.27
DSPIQCIQAIAENR	40	53	R	A	0.997	Carbamidomethyl (+57)	1613.78	2	-0.00049	-0.3
DSPIQCIQAIAENR	40	53	R	A	0.997	Carbamidomethyl (+57)	1613.78	3	0.001	0.64
DSPIQCIQAIAENR	40	53	R	A	0.997	Carbamidomethyl (+57)	1613.78	2	-0.00049	-0.3
DSPIQCIQAIAENR	40	53	R	A	0.997	Carbamidomethyl (+57)	1613.78	2	-8.7e-05	-0.054
DSPIQCIQAIAENR	40	53	R	A	0.997	Carbamidomethyl (+57)	1613.79	3	0.0019	1.2
DSPIQCIQAIAENR	40	53	R	A	0.997	Carbamidomethyl (+57)	1613.78	2	0.00091	0.57
DSPIQCIQAIAENR	40	53	R	A	0.978	Carbamidomethyl (+57)	1613.79	3	0.0025	1.6
DSPIQCIQAIAENR	40	53	R	A	0.997	Carbamidomethyl (+57)	1613.79	2	0.0029	1.8
DSPIQCIQAIAENR	40	53	R	A	0.997	Carbamidomethyl (+57)	1613.78	2	0.0013	0.81
DSPIQCIQAIAENRADAVTL	40	59	R	D	0.997	Carbamidomethyl (+57)	2184.09	3	0.0017	0.79
DSPIQCIQAIAENRADAVTL	40	59	R	D	0.997	Carbamidomethyl (+57)	2184.09	3	0.0011	0.52
DSPIQCIQAIAENRADAVTL	40	59	R	D	0.997	Carbamidomethyl (+57)	2184.08	2	-0.0013	-0.59
DSPIQCIQAIAENRADAVTLDGGFIYEAGLAPYK	40	73	R	L	0.972	Carbamidomethyl (+57)	3665.8	4	-0.0047	-1.3
DSPIQCIQAIAENRADAVTLDGGFIYEAGLAPYK	40	73	R	L	0.997	Carbamidomethyl (+57)	3665.82	3	0.015	4.1
DSPIQCIQAIAENRADAVTLDGGFIYEAGLAPYK	40	73	R	L	0.997	Carbamidomethyl (+57)	3665.81	3	0.0061	1.7
DSPIQCIQAIAENRADAVTLDGGFIYEAGLAPYK	40	73	R	L	0.997	Carbamidomethyl (+57)	3665.8	3	0.00014	0.037
DSPIQCIQAIAENRADAVTLDGGFIYEAGLAPYK	40	73	R	L	0.967	Deamidated (+1), Carbamidomethyl (+57)	3666.81	3	0.018	4.9
DSPIQCIQAIAENRADAVTLDGGFIYEAGLAPYK	40	73	R	L	0.99	Carbamidomethyl (+57)	3665.8	4	-0.0015	-0.42
DSPIQCIQAIAENRADAVTLDGGFIYEAGLAPYK	40	73	R	L	0.997	Carbamidomethyl (+57)	3665.8	3	-0.0059	-1.6
SPIQCIQAIAENRADAVTL	41	59	D	D	0.989	Carbamidomethyl (+57)	2069.06	3	0.0012	0.6
QCIQAIAENRADAVTL	44	59	I	D	0.997	Carbamidomethyl (+57)	1771.89	2	0.00021	0.12
QCIQAIAENRADAVTL	44	59	I	D	0.997	Carbamidomethyl (+57)	1771.89	2	0.0046	2.6
QCIQAIAENRADAVTL	44	59	I	D	0.997	Carbamidomethyl (+57)	1771.89	2	-0.0014	-0.78
CIQAIAENR	45	53	Q	A	0.986	Carbamidomethyl (+57)	1073.53	2	-0.0016	-1.5
CIQAIAENRADAVTL	45	59	Q	D	0.997	Carbamidomethyl (+57)	1643.83	2	0.00041	0.25
CIQAIAENRADAVTL	45	59	Q	D	0.997	Carbamidomethyl (+57), Deamidated (+1)	1644.82	2	0.004	2.4
CIQAIAENRADAVTL	45	59	Q	D	0.997	Carbamidomethyl (+57)	1643.83	2	-0.00039	-0.24
CIQAIAENRADAVTL	45	59	Q	D	0.997	Carbamidomethyl (+57)	1643.83	2	0.001	0.62
CIQAIAENRADAVTL	45	59	Q	D	0.997	Carbamidomethyl (+57)	1643.83	2	1.3e-05	0.0077
IQAIAENRADAVTL	46	59	C	D	0.997		1483.8	2	0.0011	0.73
IQAIAENRADAVTL	46	59	C	D	0.993		1483.8	2	-0.00012	-0.082
IQAIAENRADAVTL	46	59	C	D	0.997		1483.8	2	-0.00072	-0.49
IQAIAENRADAVTLDGGFIY	46	65	C	E	0.953		2136.09	2	0.0041	1.9
QAIAENRA	47	54	I	D	0.99		871.45	2	-0.00012	-0.14
QAIAENRA	47	54	I	D	0.99		871.45	2	7.8e-05	0.089
QAIAENRA	47	54	I	D	0.968		871.45	2	-0.00012	-0.14
QAIAENRA	47	54	I	D	0.99		871.45	2	-0.00032	-0.37
QAIAENRADAV	47	57	I	T	0.997		1156.58	2	-0.0012	-1.1
QAIAENRADAV	47	57	I	T	0.997	Deamidated (+1)	1157.57	2	-0.0022	-1.9
QAIAENRADAV	47	57	I	T	0.997		1156.58	2	-0.00022	-0.19
QAIAENRADAV	47	57	I	T	0.997		1156.58	2	-0.00022	-0.19
QAIAENRADAV	47	57	I	T	0.976		1156.58	2	-0.00042	-0.36
QAIAENRADAV	47	57	I	T	0.992	Deamidated (+1)	1157.57	2	0.0028	2.4
QAIAENRADAV	47	57	I	T	0.997	Deamidated (+1)	1157.57	2	0.0018	1.5
QAIAENRADAV	47	57	I	T	0.997		1156.58	2	-0.0014	-1.2
QAIAENRADAV	47	57	I	T	0.997		1156.58	2	-2.2e-05	-0.019
QAIAENRADAVT	47	58	I	L	0.997		1257.63	2	0.00028	0.22
QAIAENRADAVT	47	58	I	L	0.997		1257.63	2	0.0011	0.86
QAIAENRADAVTL	47	59	I	D	0.997		1370.72	2	0.00078	0.57
QAIAENRADAVTL	47	59	I	D	0.997		1370.72	2	0.002	1.4
QAIAENRADAVTLDGGFIYEAGLAPYKLRPV	47	77	I	A	0.997		3317.74	4	0.0029	0.88
QAIAENRADAVTLDGGFIYEAGLAPYKLRPV	47	77	I	A	0.997		3317.74	3	2e-06	0.0006
QAIAENRADAVTLDGGFIYEAGLAPYKLRPV	47	77	I	A	0.997		3317.74	3	0.003	0.9
QAIAENRADAVTLDGGFIYEAGLAPYKLRPV	47	77	I	A	0.997		3317.74	3	2e-06	0.0006
QAIAENRADAVTLDGGFIYEAGLAPYKLRPV	47	77	I	A	0.997		3317.74	4	0.0033	1
QAIAENRADAVTLDGGFIYEAGLAPYKLRPV	47	77	I	A	0.997		3317.74	3	2e-06	0.0006
QAIAENRADAVTLDGGFIYEAGLAPYKLRPV	47	77	I	A	0.997		3317.75	4	0.0057	1.7
QAIAENRADAVTLDGGFIYEAGLAPYKLRPVAA	47	79	I	E	0.953		3459.83	4	0.018	5.3
AIAENRADAV	48	57	Q	T	0.997		1028.53	2	-2.2e-05	-0.021
AIAENRADAV	48	57	Q	T	0.997		1028.53	2	0.00018	0.17
AIAENRADAVT	48	58	Q	L	0.994		1129.57	2	-0.00072	-0.64
AIAENRADAVT	48	58	Q	L	0.993		1129.57	2	-0.00032	-0.28
AIAENRADAVT	48	58	Q	L	0.997		1129.57	2	-0.00032	-0.28
AIAENRADAVTL	48	59	Q	D	0.986		1242.66	2	0.00018	0.14
AIAENRADAVTL	48	59	Q	D	0.997	Deamidated (+1)	1243.64	2	0.00056	0.45
AIAENRADAVTL	48	59	Q	D	0.997	Deamidated (+1)	1243.64	2	-0.001	-0.83
AIAENRADAVTL	48	59	Q	D	0.997		1242.66	2	-2.2e-05	-0.018
AIAENRADAVTL	48	59	Q	D	0.997		1242.66	2	-0.0016	-1.3
AIAENRADAVTL	48	59	Q	D	0.985		1242.66	2	-0.00022	-0.18
AIAENRADAVTL	48	59	Q	D	0.996	Deamidated (+1)	1243.64	2	-0.00064	-0.51
AIAENRADAVTL	48	59	Q	D	0.997	Deamidated (+1)	1243.64	2	-0.0024	-2
AIAENRADAVTL	48	59	Q	D	0.997		1242.66	2	-0.00022	-0.18
AIAENRADAVTLDGGF	48	63	Q	I	0.997		1618.8	2	0.00018	0.11
AIAENRADAVTLDGGF	48	63	Q	I	0.997		1618.8	2	0.0018	1.1
AIAENRADAVTLDGGF	48	63	Q	I	0.997		1618.8	2	0.00018	0.11
AIAENRADAVTLDGGF	48	63	Q	I	0.997		1618.8	2	0.00038	0.23
AIAENRADAVTLDGGFI	48	64	Q	Y	0.983		1731.88	2	0.0023	1.3
AIAENRADAVTLDGGFIY	48	65	Q	E	0.994		1894.95	2	0.004	2.1
AIAENRADAVTLDGGFIY	48	65	Q	E	0.997		1894.94	2	0.0022	1.1
AIAENRADAVTLDGGFIY	48	65	Q	E	0.946		1894.94	2	0.0012	0.62
AIAENRADAVTLDGGFIY	48	65	Q	E	0.997		1894.94	2	0.0018	0.94
AIAENRADAVTLDGGFIY	48	65	Q	E	0.997		1894.94	2	-0.00082	-0.43
AIAENRADAVTLDGGFIY	48	65	Q	E	0.991		1894.94	3	-0.0034	-1.8
AIAENRADAVTLDGGFIY	48	65	Q	E	0.991		1894.94	2	-0.0076	-4
AIAENRADAVTLDGGFIY	48	65	Q	E	0.992		1894.94	2	-0.003	-1.6
AIAENRADAVTLDGGFIY	48	65	Q	E	0.997		1894.95	2	0.0028	1.5
AIAENRADAVTLDGGFIY	48	65	Q	E	0.997		1894.95	2	0.0048	2.5
AIAENRADAVTLDGGFIY	48	65	Q	E	0.997		1894.94	2	-0.00042	-0.22
AIAENRADAVTLDGGFIY	48	65	Q	E	0.997		1894.94	2	0.0022	1.1
AIAENRADAVTLDGGFIY	48	65	Q	E	0.997		1894.94	2	-0.00042	-0.22
IAENRADAV	49	57	A	T	0.996		957.49	2	7.8e-05	0.081
IAENRADAV	49	57	A	T	0.967		957.49	2	-0.00032	-0.34
IAENRADAV	49	57	A	T	0.997		957.49	2	7.8e-05	0.081
IAENRADAVTL	49	59	A	D	0.993		1171.62	2	-0.00032	-0.27
IAENRADAVTL	49	59	A	D	0.988		1171.62	2	0.00028	0.24
IAENRADAVTLDGGFIY	49	65	A	E	0.981		1823.91	2	0.0037	2
IAENRADAVTLDGGFIYEAGLAPYKLRPV	49	77	A	A	0.997		3118.65	3	0.0037	1.2
IAENRADAVTLDGGFIYEAGLAPYKLRPV	49	77	A	A	0.997		3118.65	4	0.003	0.97
AENRADAV	50	57	I	T	0.99		844.4	2	0.00018	0.21
AENRADAV	50	57	I	T	0.981	Deamidated (+1)	845.39	2	0.00016	0.19
AENRADAV	50	57	I	T	0.99		844.4	2	0.00038	0.45
AENRADAV	50	57	I	T	0.99		844.4	2	0.00018	0.21
AENRADAVTL	50	59	I	D	0.997		1058.54	2	-0.00062	-0.59
AENRADAVTLDGGFIY	50	65	I	E	0.986		1710.82	2	0.0012	0.69
AENRADAVTLDGGFIYEAGLAPYK	50	73	I	L	0.973	Phospho (+80)	2620.25	2	0.026	10
AENRADAVTLDGGFIYEAGLAPYKLRPV	50	77	I	A	0.997		3005.56	4	0.0023	0.77
AENRADAVTLDGGFIYEAGLAPYKLRPV	50	77	I	A	0.997		3005.57	3	0.0058	1.9
AENRADAVTLDGGFIYEAGLAPYKLRPV	50	77	I	A	0.997		3005.56	4	-0.0017	-0.56
AENRADAVTLDGGFIYEAGLAPYKLRPV	50	77	I	A	0.997		3005.56	3	-0.0002	-0.066
AENRADAVTLDGGFIYEAGLAPYKLRPV	50	77	I	A	0.997		3005.56	3	0.0028	0.93
ENRADAVTL	51	59	A	D	0.987		987.5	2	7.8e-05	0.079
ENRADAVTL	51	59	A	D	0.949		987.5	2	0.00028	0.28
ENRADAVTLDGGFIYEAGLAPYKLRPV	51	77	A	A	0.948		2934.53	3	0.0071	2.4
ENRADAVTLDGGFIYEAGLAPYKLRPV	51	77	A	A	0.997		2934.53	4	0.0022	0.76
ENRADAVTLDGGFIYEAGLAPYKLRPV	51	77	A	A	0.984	Deamidated (+1)	2935.52	4	0.012	4
ENRADAVTLDGGFIYEAGLAPYKLRPV	51	77	A	A	0.997		2934.53	4	0.0018	0.62
RADAVTLDGGF	53	63	N	I	0.997		1120.55	2	-0.001	-0.91
RADAVTLDGGF	53	63	N	I	0.989		1120.55	2	-2.2e-05	-0.02
RADAVTLDGGF	53	63	N	I	0.997		1120.55	2	-2.2e-05	-0.02
RADAVTLDGGFI	53	64	N	Y	0.976		1233.64	2	0.00048	0.39
RADAVTLDGGFIY	53	65	N	E	0.988		1396.7	2	-0.0028	-2
RADAVTLDGGFIY	53	65	N	E	0.996		1396.7	2	-0.00062	-0.45
RADAVTLDGGFIY	53	65	N	E	0.997		1396.7	2	0.0016	1.1
RADAVTLDGGFIY	53	65	N	E	0.997		1396.7	2	-0.00042	-0.3
RADAVTLDGGFIY	53	65	N	E	0.948		1396.7	2	-0.00062	-0.45
RADAVTLDGGFIY	53	65	N	E	0.953		1396.7	2	0.00098	0.7
RADAVTLDGGFIY	53	65	N	E	0.983		1396.7	2	0.0014	0.99
RADAVTLDGGFIY	53	65	N	E	0.992		1396.7	2	0.00098	0.7
RADAVTLDGGFIY	53	65	N	E	0.992		1396.7	2	0.00098	0.7
RADAVTLDGGFIY	53	65	N	E	0.997		1396.7	2	0.00098	0.7
RADAVTLDGGFIY	53	65	N	E	0.997		1396.7	2	-0.00062	-0.45
ADAVTLDGGFIYEAGLAPYK	54	73	R	L	0.962		2070.03	3	-0.0042	-2
ADAVTLDGGFIYEAGLAPYK	54	73	R	L	0.995		2070.03	3	0.0009	0.44
ADAVTLDGGFIYEAGLAPYK	54	73	R	L	0.997		2070.04	3	0.0042	2
ADAVTLDGGFIYEAGLAPYK	54	73	R	L	0.997		2070.03	3	0.0015	0.73
ADAVTLDGGFIYEAGLAPYK	54	73	R	L	0.997		2070.03	3	0.0006	0.29
ADAVTLDGGFIYEAGLAPYK	54	73	R	L	0.997		2070.03	3	0.0006	0.29
ADAVTLDGGFIYEAGLAPYK	54	73	R	L	0.997		2070.04	2	0.0082	3.9
ADAVTLDGGFIYEAGLAPYK	54	73	R	L	0.997		2070.03	2	0.00018	0.086
ADAVTLDGGFIYEAGLAPYK	54	73	R	L	0.997		2070.03	2	0.0022	1.1
ADAVTLDGGFIYEAGLAPYK	54	73	R	L	0.997		2070.03	2	0.00018	0.086
ADAVTLDGGFIYEAGLAPYK	54	73	R	L	0.997		2070.03	2	0.0022	1.1
ADAVTLDGGFIYEAGLAPYK	54	73	R	L	0.997		2070.03	3	0.0015	0.73
ADAVTLDGGFIYEAGLAPYK	54	73	R	L	0.973		2070.03	2	0.00018	0.086
ADAVTLDGGFIYEAGLAPYK	54	73	R	L	0.997		2070.03	2	0.0022	1.1
ADAVTLDGGFIYEAGLAPYK	54	73	R	L	0.997		2070.03	2	0.00018	0.086
ADAVTLDGGFIYEAGLAPYK	54	73	R	L	0.997		2070.04	2	0.0042	2
ADAVTLDGGFIYEAGLAPYK	54	73	R	L	0.997		2070.03	2	0.0022	1.1
ADAVTLDGGFIYEAGLAPYK	54	73	R	L	0.997		2070.04	2	0.0042	2
ADAVTLDGGFIYEAGLAPYK	54	73	R	L	0.997		2070.03	2	0.00018	0.086
ADAVTLDGGFIYEAGLAPYK	54	73	R	L	0.997		2070.03	3	0.0015	0.73
ADAVTLDGGFIYEAGLAPYK	54	73	R	L	0.997		2070.03	3	0.0015	0.73
ADAVTLDGGFIYEAGLAPYK	54	73	R	L	0.997		2070.03	3	0.0024	1.2
ADAVTLDGGFIYEAGLAPYK	54	73	R	L	0.997		2070.03	3	0.0012	0.58
ADAVTLDGGFIYEAGLAPYK	54	73	R	L	0.997		2070.03	3	0.0018	0.87
ADAVTLDGGFIYEAGLAPYK	54	73	R	L	0.997		2070.03	3	0.0009	0.44
ADAVTLDGGFIYEAGLAPYK	54	73	R	L	0.997		2070.03	3	0.0021	1
ADAVTLDGGFIYEAGLAPYK	54	73	R	L	0.997		2070.03	2	0.0022	1.1
ADAVTLDGGFIYEAGLAPYK	54	73	R	L	0.997		2070.03	2	0.0022	1.1
ADAVTLDGGFIYEAGLAPYK	54	73	R	L	0.997		2070.03	2	0.0022	1.1
ADAVTLDGGFIYEAGLAPYK	54	73	R	L	0.997		2070.03	2	0.0022	1.1
ADAVTLDGGFIYEAGLAPYK	54	73	R	L	0.997		2070.04	2	0.0062	3
ADAVTLDGGFIYEAGLAPYK	54	73	R	L	0.997		2070.03	2	0.0022	1.1
ADAVTLDGGFIYEAGLAPYK	54	73	R	L	0.997		2070.03	3	0.0015	0.73
ADAVTLDGGFIYEAGLAPYK	54	73	R	L	0.997		2070.04	2	0.0042	2
ADAVTLDGGFIYEAGLAPYK	54	73	R	L	0.997		2070.03	3	0.0033	1.6
ADAVTLDGGFIYEAGLAPYK	54	73	R	L	0.997		2070.03	3	0.0012	0.58
ADAVTLDGGFIYEAGLAPYK	54	73	R	L	0.997		2070.03	3	0.0006	0.29
ADAVTLDGGFIYEAGLAPYK	54	73	R	L	0.954		2070.03	2	0.0022	1.1
ADAVTLDGGFIYEAGLAPYK	54	73	R	L	0.965		2070.04	2	0.0042	2
ADAVTLDGGFIYEAGLAPYK	54	73	R	L	0.997		2070.04	2	0.0042	2
ADAVTLDGGFIYEAGLAPYK	54	73	R	L	0.997		2070.03	2	-0.0018	-0.88
ADAVTLDGGFIYEAGLAPYK	54	73	R	L	0.997		2070.03	2	0.0022	1.1
ADAVTLDGGFIYEAGLAPYK	54	73	R	L	0.997		2070.03	2	0.0022	1.1
ADAVTLDGGFIYEAGLAPYK	54	73	R	L	0.997		2070.03	2	0.00018	0.086
ADAVTLDGGFIYEAGLAPYK	54	73	R	L	0.997		2070.03	3	-0.0015	-0.72
ADAVTLDGGFIYEAGLAPYK	54	73	R	L	0.997		2070.03	2	0.0022	1.1
ADAVTLDGGFIYEAGLAPYK	54	73	R	L	0.997		2070.03	3	0.0018	0.87
ADAVTLDGGFIYEAGLAPYK	54	73	R	L	0.997		2070.03	3	0.0024	1.2
ADAVTLDGGFIYEAGLAPYK	54	73	R	L	0.997		2070.03	3	0.0018	0.87
ADAVTLDGGFIYEAGLAPYK	54	73	R	L	0.997		2070.03	3	2e-06	0.00097
ADAVTLDGGFIYEAGLAPYK	54	73	R	L	0.997		2070.03	3	0.0024	1.2
ADAVTLDGGFIYEAGLAPYK	54	73	R	L	0.997		2070.03	3	0.0015	0.73
ADAVTLDGGFIYEAGLAPYK	54	73	R	L	0.997		2070.03	3	0.0036	1.7
ADAVTLDGGFIYEAGLAPYK	54	73	R	L	0.997		2070.04	3	0.0039	1.9
ADAVTLDGGFIYEAGLAPYK	54	73	R	L	0.997		2070.03	3	0.003	1.4
ADAVTLDGGFIYEAGLAPYK	54	73	R	L	0.997		2070.03	3	0.0006	0.29
ADAVTLDGGFIYEAGLAPYK	54	73	R	L	0.997		2070.03	3	0.0009	0.44
ADAVTLDGGFIYEAGLAPYK	54	73	R	L	0.997		2070.04	2	0.0042	2
ADAVTLDGGFIYEAGLAPYK	54	73	R	L	0.997		2070.04	2	0.0042	2
ADAVTLDGGFIYEAGLAPYK	54	73	R	L	0.997		2070.03	2	0.0022	1.1
ADAVTLDGGFIYEAGLAPYK	54	73	R	L	0.997		2070.04	2	0.0062	3
ADAVTLDGGFIYEAGLAPYK	54	73	R	L	0.997		2070.03	3	0.0033	1.6
ADAVTLDGGFIYEAGLAPYK	54	73	R	L	0.997		2070.03	2	0.0022	1.1
ADAVTLDGGFIYEAGLAPYK	54	73	R	L	0.997		2070.03	3	0.0021	1
ADAVTLDGGFIYEAGLAPYK	54	73	R	L	0.997		2070.03	2	0.00018	0.086
ADAVTLDGGFIYEAGLAPYK	54	73	R	L	0.997		2070.03	2	0.0022	1.1
ADAVTLDGGFIYEAGLAPYK	54	73	R	L	0.997		2070.03	2	0.0022	1.1
ADAVTLDGGFIYEAGLAPYK	54	73	R	L	0.997		2070.04	2	0.0042	2
ADAVTLDGGFIYEAGLAPYK	54	73	R	L	0.997		2070.03	3	-0.0018	-0.87
ADAVTLDGGFIYEAGLAPYK	54	73	R	L	0.997		2070.03	2	0.0022	1.1
ADAVTLDGGFIYEAGLAPYK	54	73	R	L	0.997		2070.03	3	0.0018	0.87
ADAVTLDGGFIYEAGLAPYK	54	73	R	L	0.997		2070.04	2	0.0042	2
ADAVTLDGGFIYEAGLAPYK	54	73	R	L	0.997		2070.03	3	0.0018	0.87
ADAVTLDGGFIYEAGLAPYK	54	73	R	L	0.997		2070.03	3	0.0021	1
ADAVTLDGGFIYEAGLAPYKLRPVAAEVYGTER	54	86	R	Q	0.988		3511.81	4	0.0098	2.8
ADAVTLDGGFIYEAGLAPYKLRPVAAEVYGTER	54	86	R	Q	0.992		3511.8	4	-0.00097	-0.28
ADAVTLDGGFIYEAGLAPYKLRPVAAEVYGTER	54	86	R	Q	0.997		3511.8	4	0.001	0.29
ADAVTLDGGFIYEAGLAPYKLRPVAAEVYGTER	54	86	R	Q	0.997		3511.8	4	-0.00017	-0.05
ADAVTLDGGFIYEAGLAPYKLRPVAAEVYGTER	54	86	R	Q	0.997		3511.82	4	0.017	4.7
ADAVTLDGGFIYEAGLAPYKLRPVAAEVYGTER	54	86	R	Q	0.997		3511.81	4	0.012	3.5
ADAVTLDGGFIYEAGLAPYKLRPVAAEVYGTER	54	86	R	Q	0.968		3511.8	4	0.0042	1.2
ADAVTLDGGFIYEAGLAPYKLRPVAAEVYGTER	54	86	R	Q	0.997		3511.81	4	0.0094	2.7
ADAVTLDGGFIYEAGLAPYKLRPVAAEVYGTER	54	86	R	Q	0.997		3511.8	4	0.0018	0.52
ADAVTLDGGFIYEAGLAPYKLRPVAAEVYGTERQPR	54	89	R	T	0.997		3893	5	-0.011	-2.9
DAVTLDGGFIYEAGLAPYKLRPV	55	77	A	A	0.997		2464.3	3	-0.0009	-0.36
TLDGGFIYEA	58	67	V	G	0.961		1084.51	2	0.00038	0.35
TLDGGFIYEA	58	67	V	G	0.971		1084.51	2	0.00058	0.53
TLDGGFIYEA	58	67	V	G	0.95		1084.51	2	-2.2e-05	-0.02
TLDGGFIYEA	58	67	V	G	0.992		1084.51	2	0.00038	0.35
TLDGGFIYEA	58	67	V	G	0.994		1084.51	2	0.00058	0.53
TLDGGFIYEAG	58	68	V	L	0.951		1141.53	2	0.00068	0.59
TLDGGFIYEAG	58	68	V	L	0.963		1141.53	2	0.00048	0.42
TLDGGFIYEAG	58	68	V	L	0.979		1141.53	2	-0.00012	-0.11
TLDGGFIYEAG	58	68	V	L	0.988		1141.53	2	7.8e-05	0.068
TLDGGFIYEAG	58	68	V	L	0.995		1141.53	2	7.8e-05	0.068
TLDGGFIYEAG	58	68	V	L	0.994		1141.53	2	-0.00052	-0.46
TLDGGFIYEAG	58	68	V	L	0.997		1141.53	2	-0.00052	-0.46
TLDGGFIYEAGLAPY	58	72	V	K	0.963		1585.77	2	0.0022	1.4
TLDGGFIYEAGLAPY	58	72	V	K	0.997		1585.77	2	0.0018	1.1
TLDGGFIYEAGLAPYK	58	73	V	L	0.997		1713.87	2	0.0082	4.8
TLDGGFIYEAGLAPYKL	58	74	V	R	0.978		1826.95	3	-0.0006	-0.33
TLDGGFIYEAGLAPYKLRPV	58	77	V	A	0.997		2179.17	3	0.0014	0.64
TLDGGFIYEAGLAPYKLRPV	58	77	V	A	0.997		2179.17	2	0.0034	1.5
TLDGGFIYEAGLAPYKLRPV	58	77	V	A	0.997		2179.17	3	0.002	0.92
TLDGGFIYEAGLAPYKLRPV	58	77	V	A	0.997		2179.17	3	0.0023	1.1
TLDGGFIYEAGLAPYKLRPV	58	77	V	A	0.997		2179.18	2	0.0074	3.4
TLDGGFIYEAGLAPYKLRPV	58	77	V	A	0.997		2179.18	2	0.011	5.2
TLDGGFIYEAGLAPYKLRPV	58	77	V	A	0.997		2179.17	3	0.0023	1.1
TLDGGFIYEAGLAPYKLRPV	58	77	V	A	0.997		2179.17	2	0.0054	2.5
TLDGGFIYEAGLAPYKLRPV	58	77	V	A	0.997		2179.17	3	0.0029	1.3
TLDGGFIYEAGLAPYKLRPV	58	77	V	A	0.997		2179.17	3	0.0023	1.1
TLDGGFIYEAGLAPYKLRPVAA	58	79	V	E	0.997		2321.24	3	0.0015	0.65
TLDGGFIYEAGLAPYKLRPVAAEV	58	81	V	Y	0.997		2549.36	3	0.0039	1.5
LDGGFIYEAGLAPYKLRPV	59	77	T	A	0.997		2078.12	3	-0.0002	-0.095
DGGFIYEAGLAPY	60	72	L	K	0.994		1371.64	2	0.0018	1.3
DGGFIYEAGLAPY	60	72	L	K	0.976		1371.64	2	0.0018	1.3
DGGFIYEAGLAPY	60	72	L	K	0.997		1371.64	2	0.0018	1.3
DGGFIYEAGLAPY	60	72	L	K	0.997		1371.64	2	0.00038	0.28
DGGFIYEAGLAPY	60	72	L	K	0.997		1371.64	2	0.0012	0.86
DGGFIYEAGLAPY	60	72	L	K	0.997		1371.64	2	0.0014	1
DGGFIYEAGLAPY	60	72	L	K	0.997		1371.64	1	0.0019	1.4
DGGFIYEAGLAPY	60	72	L	K	0.997		1371.63	2	-0.00082	-0.6
DGGFIYEAGLAPY	60	72	L	K	0.997		1371.64	1	0.0049	3.5
DGGFIYEAGLAPY	60	72	L	K	0.997		1371.64	2	0.00058	0.42
DGGFIYEAGLAPY	60	72	L	K	0.997		1371.64	2	0.00058	0.42
DGGFIYEAGLAPY	60	72	L	K	0.997		1371.64	2	0.0012	0.86
DGGFIYEAGLAPY	60	72	L	K	0.997		1371.64	2	0.00078	0.57
DGGFIYEAGLAPYKLRPV	60	77	L	A	0.997		1965.04	2	0.0016	0.8
DGGFIYEAGLAPYKLRPV	60	77	L	A	0.997		1965.04	2	0.0056	2.8
DGGFIYEAGLAPYKLRPV	60	77	L	A	0.997		1965.04	2	0.0016	0.8
DGGFIYEAGLAPYKLRPV	60	77	L	A	0.997		1965.04	3	0.0016	0.81
GGFIYEAGLAPY	61	72	D	K	0.971		1256.61	2	0.0016	1.3
FIYEAGLAPYKLRPV	63	77	G	A	0.997		1735.97	3	0.0006	0.35
YEAGLAPYKLRPV	65	77	I	A	0.997		1475.81	3	-0.0003	-0.2
YEAGLAPYKLRPV	65	77	I	A	0.997		1475.81	3	-0.0006	-0.4
AGLAPYKLRPV	67	77	E	A	0.997		1183.71	3	-0.0005	-0.42
AGLAPYKLRPV	67	77	E	A	0.997		1183.71	2	-2.2e-05	-0.019
AGLAPYKLRPV	67	77	E	A	0.993		1183.71	3	0.0037	3.1
AGLAPYKLRPV	67	77	E	A	0.997		1183.71	3	0.0004	0.34
GLAPYKLRP	68	76	A	V	0.997		1013.6	3	-0.0007	-0.69
GLAPYKLRP	68	76	A	V	0.995		1013.6	3	-0.001	-0.98
GLAPYKLRPV	68	77	A	A	0.997		1112.67	3	-0.0007	-0.63
GLAPYKLRPV	68	77	A	A	0.997		1112.67	2	-0.00012	-0.11
GLAPYKLRPV	68	77	A	A	0.997		1112.67	3	-0.0004	-0.36
GLAPYKLRPV	68	77	A	A	0.997		1112.67	2	-0.00072	-0.65
GLAPYKLRPV	68	77	A	A	0.997		1112.67	2	-0.00032	-0.29
GLAPYKLRPV	68	77	A	A	0.997		1112.67	3	-0.0004	-0.36
GLAPYKLRPV	68	77	A	A	0.997		1112.67	2	-0.0011	-1
LAPYKLRP	69	76	G	V	0.99		956.58	3	-0.0014	-1.5
LAPYKLRP	69	76	G	V	0.984		956.58	3	-0.002	-2.1
LAPYKLRPV	69	77	G	A	0.996		1055.65	3	0.0037	3.5
LAPYKLRPV	69	77	G	A	0.997		1055.65	2	-0.0034	-3.2
LAPYKLRPV	69	77	G	A	0.997		1055.65	3	-0.0023	-2.2
LAPYKLRPV	69	77	G	A	0.997		1055.65	3	0.0001	0.097
LAPYKLRPV	69	77	G	A	0.997		1055.65	2	-0.00022	-0.21
LAPYKLRPV	69	77	G	A	0.997		1055.65	2	-0.001	-0.97
LAPYKLRPV	69	77	G	A	0.997		1055.65	2	-0.0014	-1.3
LAPYKLRPV	69	77	G	A	0.997		1055.65	3	-0.0008	-0.76
LAPYKLRPV	69	77	G	A	0.997		1055.65	3	-0.0002	-0.19
LAPYKLRPV	69	77	G	A	0.997		1055.65	2	-0.00042	-0.4
LAPYKLRPV	69	77	G	A	0.997		1055.65	2	-2.2e-05	-0.021
APYKLRPV	70	77	L	A	0.978		942.56	3	-0.0002	-0.21
APYKLRPV	70	77	L	A	0.99		942.56	2	-0.00052	-0.55
APYKLRPV	70	77	L	A	0.99		942.56	2	-0.0023	-2.5
APYKLRPV	70	77	L	A	0.99		942.57	2	-0.00012	-0.13
APYKLRPV	70	77	L	A	0.988		942.56	3	-0.0002	-0.21
APYKLRPV	70	77	L	A	0.99		942.57	2	7.8e-05	0.083
APYKLRPV	70	77	L	A	0.99		942.56	2	-0.00092	-0.98
YKLRPVAAEVY	72	82	P	G	0.989		1307.72	3	0.0003	0.23
YKLRPVAAEVY	72	82	P	G	0.995		1307.72	2	-0.00052	-0.4
YKLRPVAAEVY	72	82	P	G	0.982		1307.72	3	-0.0006	-0.46
YKLRPVAAEVY	72	82	P	G	0.993		1307.72	2	-0.00012	-0.093
KLRPVAAE	73	80	Y	V	0.99		882.53	2	-0.00032	-0.36
KLRPVAAE	73	80	Y	V	0.99		882.53	2	-0.00032	-0.36
KLRPVAAE	73	80	Y	V	0.99		882.53	2	-0.00012	-0.14
KLRPVAAEV	73	81	Y	Y	0.989		981.6	2	0.00028	0.28
KLRPVAAEVY	73	82	Y	G	0.982		1144.66	2	-0.00022	-0.19
KLRPVAAEVY	73	82	Y	G	0.989		1144.66	3	-0.0005	-0.43
KLRPVAAEVY	73	82	Y	G	0.991		1144.66	3	0.0019	1.7
KLRPVAAEVY	73	82	Y	G	0.995		1144.66	3	-0.0008	-0.7
KLRPVAAEVY	73	82	Y	G	0.995		1144.66	3	-0.0011	-0.96
KLRPVAAEVY	73	82	Y	G	0.996		1144.66	3	-0.0008	-0.7
KLRPVAAEVY	73	82	Y	G	0.997		1144.66	2	-0.00062	-0.54
KLRPVAAEVY	73	82	Y	G	0.997		1144.66	2	-0.00082	-0.72
KLRPVAAEVY	73	82	Y	G	0.997		1144.66	3	-0.0002	-0.17
KLRPVAAEVY	73	82	Y	G	0.997		1144.66	2	-2.2e-05	-0.019
KLRPVAAEVY	73	82	Y	G	0.986		1144.66	2	-0.00062	-0.54
KLRPVAAEVY	73	82	Y	G	0.987		1144.66	3	-0.0005	-0.43
KLRPVAAEVY	73	82	Y	G	0.992		1144.66	3	0.0004	0.35
KLRPVAAEVY	73	82	Y	G	0.996		1144.66	3	-0.0005	-0.43
KLRPVAAEVY	73	82	Y	G	0.997		1144.66	2	0.00018	0.16
KLRPVAAEVY	73	82	Y	G	0.997		1144.66	2	-0.00022	-0.19
KLRPVAAEVYG	73	83	Y	T	0.992		1201.68	3	-0.0004	-0.33
KLRPVAAEVYG	73	83	Y	T	0.997		1201.68	2	-0.0017	-1.4
KLRPVAAEVYGTERQPRTHY	73	92	Y	Y	0.997		2370.25	4	-0.0013	-0.54
KLRPVAAEVYGTERQPRTHYY	73	93	Y	A	0.976		2533.32	4	0.00023	0.089
LRPVAAEVY	74	82	K	G	0.976		1016.57	2	-0.00042	-0.41
LRPVAAEVYGTER	74	86	K	Q	0.949		1459.78	3	0.0001	0.07
LRPVAAEVYGTER	74	86	K	Q	0.96		1459.78	2	-0.00072	-0.49
LRPVAAEVYGTER	74	86	K	Q	0.96		1459.78	3	-0.0014	-0.96
LRPVAAEVYGTER	74	86	K	Q	0.982		1459.78	2	0.0027	1.8
LRPVAAEVYGTER	74	86	K	Q	0.987		1459.78	3	-0.0014	-0.96
LRPVAAEVYGTER	74	86	K	Q	0.989		1459.78	3	-0.0008	-0.55
LRPVAAEVYGTER	74	86	K	Q	0.992		1459.78	3	-0.0011	-0.75
LRPVAAEVYGTER	74	86	K	Q	0.995		1459.78	3	0.0004	0.28
LRPVAAEVYGTER	74	86	K	Q	0.997		1459.78	3	-0.0005	-0.34
LRPVAAEVYGTER	74	86	K	Q	0.997		1459.78	3	-0.0008	-0.55
LRPVAAEVYGTER	74	86	K	Q	0.997		1459.78	3	0.0025	1.7
LRPVAAEVYGTER	74	86	K	Q	0.997		1459.78	3	0.0028	1.9
LRPVAAEVYGTER	74	86	K	Q	0.997		1459.78	3	-0.0011	-0.75
LRPVAAEVYGTER	74	86	K	Q	0.997		1459.78	3	0.0001	0.07
LRPVAAEVYGTER	74	86	K	Q	0.997		1459.78	3	0.0001	0.07
LRPVAAEVYGTER	74	86	K	Q	0.997		1459.78	3	0.0007	0.48
LRPVAAEVYGTER	74	86	K	Q	0.997		1459.78	3	0.0004	0.28
LRPVAAEVYGTER	74	86	K	Q	0.997		1459.78	3	-0.0008	-0.55
LRPVAAEVYGTER	74	86	K	Q	0.997		1459.78	3	-0.0002	-0.14
LRPVAAEVYGTER	74	86	K	Q	0.997		1459.78	3	-0.0002	-0.14
LRPVAAEVYGTER	74	86	K	Q	0.997		1459.78	2	-0.00032	-0.22
LRPVAAEVYGTER	74	86	K	Q	0.997		1459.78	2	0.00028	0.19
LRPVAAEVYGTER	74	86	K	Q	0.997		1459.78	2	-0.00052	-0.36
LRPVAAEVYGTER	74	86	K	Q	0.997		1459.78	3	-0.0029	-2
LRPVAAEVYGTER	74	86	K	Q	0.997		1459.78	2	7.8e-05	0.053
LRPVAAEVYGTER	74	86	K	Q	0.957		1459.78	3	0.0007	0.48
LRPVAAEVYGTER	74	86	K	Q	0.983		1459.78	3	-0.0002	-0.14
LRPVAAEVYGTER	74	86	K	Q	0.983		1459.78	3	-0.0005	-0.34
LRPVAAEVYGTER	74	86	K	Q	0.987		1459.78	3	0.0001	0.07
LRPVAAEVYGTER	74	86	K	Q	0.989		1459.78	3	0.0007	0.48
LRPVAAEVYGTER	74	86	K	Q	0.989		1459.78	3	0.0004	0.28
LRPVAAEVYGTER	74	86	K	Q	0.993		1459.78	3	-0.0005	-0.34
LRPVAAEVYGTER	74	86	K	Q	0.997		1459.78	3	-0.0005	-0.34
LRPVAAEVYGTER	74	86	K	Q	0.997		1459.78	3	-0.0005	-0.34
LRPVAAEVYGTER	74	86	K	Q	0.997		1459.78	3	-0.0005	-0.34
LRPVAAEVYGTER	74	86	K	Q	0.997		1459.78	3	0.0001	0.07
LRPVAAEVYGTER	74	86	K	Q	0.997		1459.78	3	-0.0011	-0.75
LRPVAAEVYGTER	74	86	K	Q	0.997		1459.78	3	0.0007	0.48
LRPVAAEVYGTER	74	86	K	Q	0.997		1459.78	3	0.0004	0.28
LRPVAAEVYGTER	74	86	K	Q	0.997		1459.78	3	-0.0011	-0.75
LRPVAAEVYGTER	74	86	K	Q	0.997		1459.78	3	0.0001	0.07
LRPVAAEVYGTER	74	86	K	Q	0.997		1459.78	3	0.0016	1.1
LRPVAAEVYGTER	74	86	K	Q	0.997		1459.78	3	0.0013	0.89
LRPVAAEVYGTER	74	86	K	Q	0.997		1459.78	3	-0.0002	-0.14
LRPVAAEVYGTER	74	86	K	Q	0.997		1459.78	3	-0.0005	-0.34
LRPVAAEVYGTER	74	86	K	Q	0.997		1459.78	2	-0.00032	-0.22
LRPVAAEVYGTER	74	86	K	Q	0.997		1459.78	2	0.00088	0.6
LRPVAAEVYGTER	74	86	K	Q	0.997		1459.78	2	-0.0011	-0.77
LRPVAAEVYGTER	74	86	K	Q	0.997		1459.78	3	-0.0014	-0.96
LRPVAAEVYGTER	74	86	K	Q	0.997		1459.78	3	-0.002	-1.4
LRPVAAEVYGTERQPR	74	89	K	T	0.992		1840.99	2	-0.0026	-1.4
LRPVAAEVYGTERQPR	74	89	K	T	0.997	Deamidated (+1)	1841.98	3	0.0054	2.9
LRPVAAEVYGTERQPR	74	89	K	T	0.997	Deamidated (+1)	1841.98	4	0.0036	2
LRPVAAEVYGTERQPR	74	89	K	T	0.997		1840.99	3	0.0006	0.33
LRPVAAEVYGTERQPR	74	89	K	T	0.997		1840.99	4	0.00043	0.23
LRPVAAEVYGTERQPR	74	89	K	T	0.997		1840.99	3	-0.0012	-0.65
LRPVAAEVYGTERQPR	74	89	K	T	0.997		1840.99	4	-0.0048	-2.6
LRPVAAEVYGTERQPR	74	89	K	T	0.997	Deamidated (+1)	1841.98	3	0.0021	1.1
LRPVAAEVYGTERQPR	74	89	K	T	0.997		1840.99	4	-0.0052	-2.8
LRPVAAEVYGTERQPR	74	89	K	T	0.997		1840.99	3	2e-06	0.0011
LRPVAAEVYGTERQPR	74	89	K	T	0.997	Deamidated (+1)	1841.97	3	-0.00061	-0.33
LRPVAAEVYGTERQPR	74	89	K	T	0.997		1840.99	4	0.00043	0.23
RPVAAEVY	75	82	L	G	0.99		903.48	2	-0.00052	-0.58
RPVAAEVY	75	82	L	G	0.989		903.48	2	-0.0011	-1.2
RPVAAEVYGTE	75	85	L	R	0.951		1190.59	2	0.0011	0.9
PVAAEVYGTER	76	86	R	Q	0.997		1190.59	2	-0.0011	-0.94
PVAAEVYGTER	76	86	R	Q	0.997		1190.59	2	7.8e-05	0.065
AAEVYGTERQPR	78	89	V	T	0.997		1375.68	2	-0.00022	-0.16
AAEVYGTERQPR	78	89	V	T	0.997		1375.68	2	0.00038	0.27
AAEVYGTERQPR	78	89	V	T	0.997		1375.68	3	-0.0008	-0.58
AAEVYGTERQPRT	78	90	V	H	0.997		1476.73	2	0.00048	0.32
AAEVYGTERQPRTH	78	91	V	Y	0.997		1613.79	4	-0.00097	-0.6
AAEVYGTERQPRTH	78	91	V	Y	0.997		1613.79	2	-0.0016	-1
AAEVYGTERQPRTH	78	91	V	Y	0.997		1613.79	4	-0.00017	-0.11
AAEVYGTERQPRTH	78	91	V	Y	0.997		1613.79	2	-0.0024	-1.5
AAEVYGTERQPRTH	78	91	V	Y	0.997		1613.79	3	-0.001	-0.62
AAEVYGTERQPRTHY	78	92	V	Y	0.973		1776.84	3	-0.018	-9.9
AAEVYGTERQPRTHY	78	92	V	Y	0.997		1776.85	3	0.0004	0.23
AAEVYGTERQPRTHYY	78	93	V	A	0.991		1939.92	4	0.00043	0.22
AAEVYGTERQPRTHYY	78	93	V	A	0.997		1939.92	3	-0.0018	-0.93
AAEVYGTERQPRTHYYA	78	94	V	V	0.991		2010.95	4	0.00013	0.063
AAEVYGTERQPRTHYYA	78	94	V	V	0.997		2010.95	3	-0.001	-0.5
AAEVYGTERQPRTHYYA	78	94	V	V	0.997		2010.95	2	-0.0013	-0.66
AAEVYGTERQPRTHYYA	78	94	V	V	0.994		2010.95	4	-0.0023	-1.1
AAEVYGTERQPRTHYYA	78	94	V	V	0.997		2010.95	3	-9.8e-05	-0.049
AAEVYGTERQPRTHYYA	78	94	V	V	0.997		2010.95	2	-0.0013	-0.66
AAEVYGTERQPRTHYYA	78	94	V	V	0.997		2010.95	3	-0.0016	-0.79
AAEVYGTERQPRTHYYAV	78	95	V	A	0.994		2110.03	2	0.0023	1.1
AAEVYGTERQPRTHYYAV	78	95	V	A	0.997		2110.02	3	0.0011	0.52
AAEVYGTERQPRTHYYAVA	78	96	V	V	0.994		2181.06	2	-0.00082	-0.38
AAEVYGTERQPRTHYYAVA	78	96	V	V	0.997		2181.06	3	0.0007	0.32
AAEVYGTERQPRTHYYAVA	78	96	V	V	0.997		2181.06	3	0.001	0.46
AAEVYGTERQPRTHYYAVA	78	96	V	V	0.997		2181.06	2	0.0012	0.54
AAEVYGTERQPRTHYYAVAVV	78	98	V	K	0.976		2379.2	4	-0.0014	-0.58
AAEVYGTERQPRTHYYAVAVVKKGGSFQLNELQGLKS	78	114	V	C	0.996		4094.14	6	0.0046	1.1
AAEVYGTERQPRTHYYAVAVVKKGGSFQLNELQGLKS	78	114	V	C	0.997		4093.13	6	-1	-240
AAEVYGTERQPRTHYYAVAVVKKGGSFQLNELQGLKS	78	114	V	C	0.997		4094.13	5	-0.00085	-0.21
AAEVYGTERQPRTHYYAVAVVKKGGSFQLNELQGLKS	78	114	V	C	0.997		4094.14	6	0.0034	0.82
AAEVYGTERQPRTHYYAVAVVKKGGSFQLNELQGLKS	78	114	V	C	0.997		4094.13	6	0.00097	0.24
AAEVYGTERQPRTHYYAVAVVKKGGSFQLNELQGLKS	78	114	V	C	0.997		4094.13	5	-0.00085	-0.21
AAEVYGTERQPRTHYYAVAVVKKGGSFQLNELQGLKS	78	114	V	C	0.997		4094.13	5	-0.0023	-0.57
AEVYGTERQPR	79	89	A	T	0.997		1304.65	2	0.00068	0.52
AEVYGTERQPR	79	89	A	T	0.997		1304.65	3	-0.0004	-0.3
AEVYGTERQPR	79	89	A	T	0.997		1304.65	2	0.00028	0.21
AEVYGTERQPR	79	89	A	T	0.997		1304.65	3	0.0002	0.15
AEVYGTERQPR	79	89	A	T	0.997		1304.65	2	-0.00092	-0.71
AEVYGTERQPRT	79	90	A	H	0.963		1405.7	2	0.00038	0.27
AEVYGTERQPRT	79	90	A	H	0.992		1405.7	3	0.0003	0.21
AEVYGTERQPRT	79	90	A	H	0.995		1405.7	3	0.0006	0.43
AEVYGTERQPRTH	79	91	A	Y	0.997		1542.75	3	2e-06	0.0013
AEVYGTERQPRTH	79	91	A	Y	0.997		1542.75	4	0.00093	0.6
AEVYGTERQPRTH	79	91	A	Y	0.997		1542.75	2	-0.00052	-0.34
AEVYGTERQPRTH	79	91	A	Y	0.997		1542.75	4	-0.0039	-2.5
AEVYGTERQPRTH	79	91	A	Y	0.997		1542.75	2	-0.0033	-2.2
AEVYGTERQPRTH	79	91	A	Y	0.997		1542.75	3	-0.0003	-0.19
AEVYGTERQPRTHYY	79	93	A	A	0.96		1868.88	3	-0.0029	-1.5
AEVYGTERQPRTHYYA	79	94	A	V	0.948		1939.92	4	-0.00037	-0.19
AEVYGTERQPRTHYYA	79	94	A	V	0.955		1939.92	3	-0.0012	-0.62
AEVYGTERQPRTHYYA	79	94	A	V	0.997		1939.92	2	0.0026	1.3
AEVYGTERQPRTHYYA	79	94	A	V	0.997		1939.92	3	0.0012	0.62
AEVYGTERQPRTHYYA	79	94	A	V	0.997		1939.92	2	0.002	1
AEVYGTERQPRTHYYA	79	94	A	V	0.997		1939.92	3	0.0003	0.16
AEVYGTERQPRTHYYAV	79	95	A	A	0.979		2038.99	3	-0.0006	-0.29
AEVYGTERQPRTHYYAVA	79	96	A	V	0.948		2110.02	2	-0.0037	-1.8
AEVYGTERQPRTHYYAVA	79	96	A	V	0.997		2110.03	2	0.0023	1.1
AEVYGTERQPRTHYYAVAVVKKGGSFQLNELQGLKS	79	114	A	C	0.997		4023.11	5	0.012	3
AEVYGTERQPRTHYYAVAVVKKGGSFQLNELQGLKS	79	114	A	C	0.997		4024.1	5	1	250
AEVYGTERQPRTHYYAVAVVKKGGSFQLNELQGLKS	79	114	A	C	0.997		4023.09	5	-0.0077	-1.9
EVYGTERQPR	80	89	A	T	0.997		1233.61	2	0.00058	0.47
EVYGTERQPR	80	89	A	T	0.997		1233.61	2	-2.2e-05	-0.018
EVYGTERQPR	80	89	A	T	0.997		1233.61	2	-0.0016	-1.3
EVYGTERQPR	80	89	A	T	0.997		1233.61	2	-0.00022	-0.18
EVYGTERQPRT	80	90	A	H	0.992		1334.66	3	-0.0008	-0.6
EVYGTERQPRT	80	90	A	H	0.997		1334.66	2	7.8e-05	0.058
EVYGTERQPRT	80	90	A	H	0.997		1334.66	2	-0.00072	-0.54
EVYGTERQPRT	80	90	A	H	0.997		1334.66	2	7.8e-05	0.058
EVYGTERQPRT	80	90	A	H	0.997		1334.66	3	-0.0011	-0.82
EVYGTERQPRT	80	90	A	H	0.997		1334.66	2	-0.00052	-0.39
EVYGTERQPRTH	80	91	A	Y	0.967		1471.71	3	-0.002	-1.4
EVYGTERQPRTH	80	91	A	Y	0.997		1471.72	4	0.00043	0.29
EVYGTERQPRTH	80	91	A	Y	0.997		1471.72	2	0.00038	0.26
EVYGTERQPRTH	80	91	A	Y	0.997		1471.72	3	0.0001	0.069
EVYGTERQPRTH	80	91	A	Y	0.997		1471.71	3	-0.002	-1.4
EVYGTERQPRTH	80	91	A	Y	0.997		1471.72	2	0.00018	0.12
EVYGTERQPRTH	80	91	A	Y	0.997		1471.72	4	0.00043	0.29
EVYGTERQPRTH	80	91	A	Y	0.997		1471.72	3	0.0001	0.069
EVYGTERQPRTHY	80	92	A	Y	0.951		1634.78	4	-0.00087	-0.53
EVYGTERQPRTHY	80	92	A	Y	0.997		1634.78	3	-0.0006	-0.37
EVYGTERQPRTHY	80	92	A	Y	0.977		1634.78	4	-7.4e-05	-0.045
EVYGTERQPRTHY	80	92	A	Y	0.997		1634.78	3	2e-06	0.0012
EVYGTERQPRTHYY	80	93	A	A	0.997		1797.84	2	-0.0012	-0.68
EVYGTERQPRTHYY	80	93	A	A	0.997		1797.84	2	-0.00022	-0.12
EVYGTERQPRTHYYA	80	94	A	V	0.997		1868.88	3	-0.0002	-0.11
EVYGTERQPRTHYYA	80	94	A	V	0.997		1868.88	2	-0.00072	-0.39
EVYGTERQPRTHYYA	80	94	A	V	0.997		1868.88	2	-0.0015	-0.81
EVYGTERQPRTHYYA	80	94	A	V	0.997		1868.88	3	-0.0002	-0.11
EVYGTERQPRTHYYA	80	94	A	V	0.997		1868.88	2	-0.00032	-0.17
EVYGTERQPRTHYYAV	80	95	A	A	0.997		1967.95	3	-0.0011	-0.56
EVYGTERQPRTHYYAVA	80	96	A	V	0.987		2038.99	3	0.0012	0.59
EVYGTERQPRTHYYAVA	80	96	A	V	0.997		2038.99	2	0.0014	0.68
EVYGTERQPRTHYYAVAVVKKGGSFQLNELQGLKS	80	114	A	C	0.953		3952.06	6	0.00057	0.15
EVYGTERQPRTHYYAVAVVKKGGSFQLNELQGLKS	80	114	A	C	0.997		3952.06	5	-0.0041	-1
EVYGTERQPRTHYYAVAVVKKGGSFQLNELQGLKS	80	114	A	C	0.963		3952.06	5	0.0029	0.72
EVYGTERQPRTHYYAVAVVKKGGSFQLNELQGLKS	80	114	A	C	0.997		3952.06	6	-0.00063	-0.16
EVYGTERQPRTHYYAVAVVKKGGSFQLNELQGLKSCHTGLRRT	80	122	A	A	0.997	Carbamidomethyl (+57)	4933.55	7	-0.0049	-0.99
EVYGTERQPRTHYYAVAVVKKGGSFQLNELQGLKSCHTGLRRT	80	122	A	A	0.997	Carbamidomethyl (+57)	4934.55	7	1	200
VYGTERQPR	81	89	E	T	0.997		1104.57	2	-0.0014	-1.3
VYGTERQPR	81	89	E	T	0.997		1104.57	2	0.00038	0.34
VYGTERQPRT	81	90	E	H	0.994		1205.62	2	0.0015	1.2
VYGTERQPRT	81	90	E	H	0.991		1205.61	2	-0.0015	-1.3
YGTERQPR	82	89	V	T	0.99		1005.5	2	0.00018	0.18
YGTERQPR	82	89	V	T	0.99		1005.5	2	-0.0012	-1.2
YGTERQPR	82	89	V	T	0.955		1005.5	3	2e-06	0.002
YGTERQPR	82	89	V	T	0.99		1005.5	2	-0.00022	-0.22
YGTERQPRT	82	90	V	H	0.957		1106.55	3	0.0001	0.092
YGTERQPRT	82	90	V	H	0.986		1106.55	2	-0.0011	-1
YGTERQPRT	82	90	V	H	0.997		1106.55	2	-0.0015	-1.4
YGTERQPRT	82	90	V	H	0.997		1106.55	2	0.00028	0.25
YGTERQPRT	82	90	V	H	0.954		1106.54	2	-0.0031	-2.8
YGTERQPRT	82	90	V	H	0.959		1106.55	3	0.0001	0.092
YGTERQPRT	82	90	V	H	0.988		1106.55	1	-0.00025	-0.22
YGTERQPRT	82	90	V	H	0.997		1106.55	2	0.00048	0.43
YGTERQPRT	82	90	V	H	0.997		1106.55	2	7.8e-05	0.07
YGTERQPRTH	82	91	V	Y	0.971		1243.61	2	0.00098	0.79
YGTERQPRTH	82	91	V	Y	0.984		1243.61	4	0.00023	0.18
YGTERQPRTH	82	91	V	Y	0.992		1243.61	3	0.0007	0.56
YGTERQPRTH	82	91	V	Y	0.997		1243.61	3	0.0004	0.32
YGTERQPRTH	82	91	V	Y	0.997		1243.61	2	-2.2e-05	-0.018
YGTERQPRTH	82	91	V	Y	0.985		1243.61	4	0.00023	0.18
YGTERQPRTH	82	91	V	Y	0.988		1243.61	3	0.0007	0.56
YGTERQPRTH	82	91	V	Y	0.995		1243.61	3	0.0004	0.32
YGTERQPRTH	82	91	V	Y	0.995		1243.61	2	-2.2e-05	-0.018
YGTERQPRTH	82	91	V	Y	0.996		1243.6	1	-0.0011	-0.92
YGTERQPRTH	82	91	V	Y	0.997		1243.61	2	0.0014	1.1
YGTERQPRTH	82	91	V	Y	0.997		1243.61	2	-0.00042	-0.34
YGTERQPRTHY	82	92	V	Y	0.955		1406.67	2	-0.0019	-1.4
YGTERQPRTHYY	82	93	V	A	0.997		1569.73	2	-0.0014	-0.91
YGTERQPRTHYY	82	93	V	A	0.997		1569.73	3	-0.0004	-0.25
YGTERQPRTHYY	82	93	V	A	0.997		1569.73	2	0.00018	0.11
YGTERQPRTHYYA	82	94	V	V	0.99		1640.77	2	-0.0019	-1.2
YGTERQPRTHYYA	82	94	V	V	0.989		1640.77	3	0.0001	0.062
YGTERQPRTHYYA	82	94	V	V	0.997		1640.77	2	-0.0027	-1.7
YGTERQPRTHYYAV	82	95	V	A	0.968		1739.84	2	0.0021	1.2
YGTERQPRTHYYAV	82	95	V	A	0.995		1739.84	3	0.0004	0.23
YGTERQPRTHYYAVAVVKKGGSFQLNELQGLKS	82	114	V	C	0.973		3723.95	6	0.0024	0.64
YGTERQPRTHYYAVAVVKKGGSFQLNELQGLKS	82	114	V	C	0.977		3723.95	5	0.0014	0.36
YGTERQPRTHYYAVAVVKKGGSFQLNELQGLKS	82	114	V	C	0.979		3723.95	4	0.0053	1.4
YGTERQPRTHYYAVAVVKKGGSFQLNELQGLKS	82	114	V	C	0.967		3723.95	5	0.0029	0.77
YGTERQPRTHYYAVAVVKKGGSFQLNELQGLKS	82	114	V	C	0.996		3723.95	6	0.00057	0.15
YGTERQPRTHYYAVAVVKKGGSFQLNELQGLKS	82	114	V	C	0.997		3723.95	5	0.0029	0.77
GTERQPRT	83	90	Y	H	0.981		943.48	2	-0.00082	-0.87
GTERQPRT	83	90	Y	H	0.99		943.48	2	0.00058	0.61
GTERQPRT	83	90	Y	H	0.99		943.48	2	0.00038	0.4
GTERQPRTH	83	91	Y	Y	0.967		1080.54	2	0.0013	1.2
GTERQPRTH	83	91	Y	Y	0.986		1080.54	3	0.0002	0.19
GTERQPRTH	83	91	Y	Y	0.985		1080.54	2	0.00068	0.63
GTERQPRTH	83	91	Y	Y	0.997		1080.54	3	-0.0004	-0.37
GTERQPRTHY	83	92	Y	Y	0.994		1243.6	2	-0.0012	-0.98
GTERQPRTHY	83	92	Y	Y	0.996		1243.61	2	-0.00082	-0.66
GTERQPRTHY	83	92	Y	Y	0.997		1243.61	3	-0.0008	-0.64
GTERQPRTHY	83	92	Y	Y	0.997		1243.61	2	-0.00042	-0.34
GTERQPRTHY	83	92	Y	Y	0.997		1243.61	3	-0.0005	-0.4
GTERQPRTHY	83	92	Y	Y	0.994		1243.61	3	-0.0002	-0.16
GTERQPRTHY	83	92	Y	Y	0.997		1243.61	3	0.0004	0.32
GTERQPRTHY	83	92	Y	Y	0.997		1243.6	2	-0.0018	-1.5
GTERQPRTHY	83	92	Y	Y	0.997		1243.61	2	0.00058	0.46
GTERQPRTHYY	83	93	Y	A	0.997		1406.67	2	7.8e-05	0.055
GTERQPRTHYY	83	93	Y	A	0.992		1406.67	3	-0.0003	-0.21
GTERQPRTHYY	83	93	Y	A	0.997		1406.67	3	-0.0003	-0.21
GTERQPRTHYY	83	93	Y	A	0.997		1406.67	2	0.00028	0.2
GTERQPRTHYYAVAVVKKGGSFQLNELQGLKSCHTGL	83	119	Y	R	0.997	Carbamidomethyl (+57)	4129.12	7	-0.0039	-0.94
GTERQPRTHYYAVAVVKKGGSFQLNELQGLKSCHTGL	83	119	Y	R	0.997	Carbamidomethyl (+57)	4129.13	6	0.0016	0.39
GTERQPRTHYYAVAVVKKGGSFQLNELQGLKSCHTGL	83	119	Y	R	0.997	Carbamidomethyl (+57)	4129.13	6	0.0028	0.68
GTERQPRTHYYAVAVVKKGGSFQLNELQGLKSCHTGL	83	119	Y	R	0.997	Carbamidomethyl (+57)	4129.12	5	-0.011	-2.6
GTERQPRTHYYAVAVVKKGGSFQLNELQGLKSCHTGL	83	119	Y	R	0.997	Carbamidomethyl (+57)	4129.13	6	-0.0014	-0.34
GTERQPRTHYYAVAVVKKGGSFQLNELQGLKSCHTGL	83	119	Y	R	0.997	Carbamidomethyl (+57)	4129.13	6	0.00041	0.099
TERQPRTHY	84	92	G	Y	0.996		1186.58	3	-0.0009	-0.76
TERQPRTHY	84	92	G	Y	0.993		1186.58	3	-0.0003	-0.25
ERQPRTHYYA	85	94	T	V	0.984		1319.64	3	-0.0003	-0.23
ERQPRTHYYA	85	94	T	V	0.993		1319.64	2	-0.00022	-0.17
ERQPRTHYYA	85	94	T	V	0.992		1319.64	3	-0.0006	-0.45
ERQPRTHYYA	85	94	T	V	0.996		1319.64	2	-0.001	-0.77
ERQPRTHYYAV	85	95	T	A	0.981		1418.7	3	-0.0009	-0.63
THYYAVAVVK	90	99	R	K	0.951		1149.62	3	0.0005	0.44
THYYAVAVVK	90	99	R	K	0.953		1149.62	3	-0.0007	-0.61
THYYAVAVVK	90	99	R	K	0.962		1149.62	3	0.0002	0.18
THYYAVAVVK	90	99	R	K	0.965		1149.62	3	0.0002	0.18
THYYAVAVVK	90	99	R	K	0.973		1149.62	2	0.00068	0.59
THYYAVAVVK	90	99	R	K	0.981		1149.62	2	0.0015	1.3
THYYAVAVVK	90	99	R	K	0.984		1149.62	3	-9.8e-05	-0.085
THYYAVAVVK	90	99	R	K	0.988		1149.63	2	0.0069	6
THYYAVAVVK	90	99	R	K	0.988		1149.62	3	0.0005	0.44
THYYAVAVVK	90	99	R	K	0.989		1149.62	2	0.00068	0.59
THYYAVAVVK	90	99	R	K	0.994		1149.62	3	0.0002	0.18
THYYAVAVVK	90	99	R	K	0.994		1149.62	3	0.0017	1.5
THYYAVAVVK	90	99	R	K	0.997		1149.62	2	0.00068	0.59
THYYAVAVVK	90	99	R	K	0.997		1149.62	3	0.0002	0.18
THYYAVAVVK	90	99	R	K	0.997		1149.62	2	0.0011	0.94
THYYAVAVVK	90	99	R	K	0.997		1149.62	3	-9.8e-05	-0.085
THYYAVAVVK	90	99	R	K	0.997		1149.62	2	0.0021	1.8
THYYAVAVVK	90	99	R	K	0.997		1149.62	3	-9.8e-05	-0.085
THYYAVAVVK	90	99	R	K	0.997		1149.62	3	0.0014	1.2
THYYAVAVVK	90	99	R	K	0.997		1149.62	3	0.0011	0.96
THYYAVAVVK	90	99	R	K	0.997		1149.62	2	-0.0021	-1.8
THYYAVAVVK	90	99	R	K	0.997		1149.62	3	-9.8e-05	-0.085
THYYAVAVVK	90	99	R	K	0.997		1149.62	2	0.0013	1.1
THYYAVAVVK	90	99	R	K	0.997		1149.62	2	0.00028	0.24
THYYAVAVVK	90	99	R	K	0.997		1149.62	2	0.00068	0.59
THYYAVAVVK	90	99	R	K	0.997		1149.62	2	0.0017	1.5
THYYAVAVVK	90	99	R	K	0.997		1149.62	2	-0.00012	-0.11
THYYAVAVVK	90	99	R	K	0.997		1149.62	2	0.00068	0.59
THYYAVAVVK	90	99	R	K	0.997		1149.62	2	0.00028	0.24
THYYAVAVVK	90	99	R	K	0.997		1149.62	2	-0.00032	-0.28
THYYAVAVVK	90	99	R	K	0.997		1149.62	2	-0.00012	-0.11
THYYAVAVVK	90	99	R	K	0.997		1149.62	2	-0.00012	-0.11
THYYAVAVVK	90	99	R	K	0.997		1149.62	3	-0.001	-0.87
THYYAVAVVK	90	99	R	K	0.997		1149.62	2	-0.0013	-1.1
THYYAVAVVK	90	99	R	K	0.949		1149.62	3	0.0014	1.2
THYYAVAVVK	90	99	R	K	0.958		1149.62	3	0.0005	0.44
THYYAVAVVK	90	99	R	K	0.97		1149.62	3	-9.8e-05	-0.085
THYYAVAVVK	90	99	R	K	0.974		1149.62	2	0.00068	0.59
THYYAVAVVK	90	99	R	K	0.975		1149.62	3	0.0005	0.44
THYYAVAVVK	90	99	R	K	0.978		1149.62	3	-9.8e-05	-0.085
THYYAVAVVK	90	99	R	K	0.981		1149.62	3	0.0008	0.7
THYYAVAVVK	90	99	R	K	0.983		1149.62	2	-0.00072	-0.63
THYYAVAVVK	90	99	R	K	0.988		1149.62	3	-0.0022	-1.9
THYYAVAVVK	90	99	R	K	0.991		1149.62	2	0.0011	0.94
THYYAVAVVK	90	99	R	K	0.994		1149.62	3	0.0005	0.44
THYYAVAVVK	90	99	R	K	0.994		1149.62	2	0.00028	0.24
THYYAVAVVK	90	99	R	K	0.995		1149.62	2	0.00028	0.24
THYYAVAVVK	90	99	R	K	0.996		1149.62	3	-9.8e-05	-0.085
THYYAVAVVK	90	99	R	K	0.996		1149.62	3	-9.8e-05	-0.085
THYYAVAVVK	90	99	R	K	0.997		1149.62	2	0.00048	0.42
THYYAVAVVK	90	99	R	K	0.997		1149.62	2	0.0015	1.3
THYYAVAVVK	90	99	R	K	0.997		1149.62	2	0.0015	1.3
THYYAVAVVK	90	99	R	K	0.997		1149.62	3	-9.8e-05	-0.085
THYYAVAVVK	90	99	R	K	0.997		1149.62	3	-9.8e-05	-0.085
THYYAVAVVK	90	99	R	K	0.997		1149.62	2	0.0021	1.8
THYYAVAVVK	90	99	R	K	0.997		1149.62	3	0.0002	0.18
THYYAVAVVK	90	99	R	K	0.997		1149.62	2	0.00028	0.24
THYYAVAVVK	90	99	R	K	0.997		1149.62	2	0.00068	0.59
THYYAVAVVK	90	99	R	K	0.997		1149.62	2	-0.00032	-0.28
THYYAVAVVK	90	99	R	K	0.997		1149.62	3	-9.8e-05	-0.085
THYYAVAVVK	90	99	R	K	0.997		1149.62	2	0.0019	1.6
THYYAVAVVK	90	99	R	K	0.997		1149.62	2	0.00028	0.24
THYYAVAVVK	90	99	R	K	0.997		1149.62	3	0.0017	1.5
THYYAVAVVK	90	99	R	K	0.997		1149.62	2	0.00088	0.76
THYYAVAVVK	90	99	R	K	0.997		1149.62	3	-0.0004	-0.35
THYYAVAVVK	90	99	R	K	0.997		1149.62	3	0.0005	0.44
THYYAVAVVK	90	99	R	K	0.997		1149.62	3	0.0014	1.2
THYYAVAVVK	90	99	R	K	0.997		1149.62	3	0.0005	0.44
THYYAVAVVK	90	99	R	K	0.997		1149.62	2	7.8e-05	0.068
THYYAVAVVK	90	99	R	K	0.997		1149.62	2	0.00068	0.59
THYYAVAVVK	90	99	R	K	0.997		1149.62	2	0.00068	0.59
THYYAVAVVK	90	99	R	K	0.997		1149.62	2	-0.00092	-0.8
THYYAVAVVK	90	99	R	K	0.997		1149.62	2	-0.00012	-0.11
THYYAVAVVK	90	99	R	K	0.997		1149.62	2	0.00088	0.76
THYYAVAVVK	90	99	R	K	0.997		1149.62	2	-0.00032	-0.28
THYYAVAVVK	90	99	R	K	0.997		1149.62	2	0.00028	0.24
THYYAVAVVK	90	99	R	K	0.997		1149.62	2	-0.00012	-0.11
THYYAVAVVK	90	99	R	K	0.997		1149.62	2	-0.00092	-0.8
THYYAVAVVK	90	99	R	K	0.997		1149.62	2	-0.00032	-0.28
THYYAVAVVK	90	99	R	K	0.997		1149.62	3	0.0002	0.18
THYYAVAVVK	90	99	R	K	0.997		1149.62	2	-0.0011	-0.98
THYYAVAVVKK	90	100	R	G	0.99		1277.71	4	0.00093	0.72
THYYAVAVVKK	90	100	R	G	0.997		1277.71	2	0.00028	0.22
THYYAVAVVKK	90	100	R	G	0.997		1277.71	4	-0.00027	-0.21
THYYAVAVVKK	90	100	R	G	0.997		1277.71	3	0.0013	1
THYYAVAVVKK	90	100	R	G	0.997		1277.71	2	-0.00052	-0.41
THYYAVAVVKK	90	100	R	G	0.997		1277.71	3	0.0001	0.08
THYYAVAVVKK	90	100	R	G	0.997		1277.71	4	0.00013	0.099
THYYAVAVVKK	90	100	R	G	0.997		1277.71	2	0.00048	0.37
THYYAVAVVKK	90	100	R	G	0.997		1277.71	3	-0.0005	-0.39
THYYAVAVVKK	90	100	R	G	0.978		1277.71	4	-0.00067	-0.53
THYYAVAVVKK	90	100	R	G	0.997		1277.71	2	-0.00072	-0.56
THYYAVAVVKK	90	100	R	G	0.997		1277.71	4	-0.00027	-0.21
THYYAVAVVKK	90	100	R	G	0.997		1277.71	3	0.0013	1
THYYAVAVVKK	90	100	R	G	0.997		1277.71	2	-0.00052	-0.41
THYYAVAVVKK	90	100	R	G	0.997		1277.71	3	0.0001	0.08
THYYAVAVVKKGGSFQLNELQGLK	90	113	R	S	0.997	Deamidated (+1)	2650.43	5	0.017	6.2
THYYAVAVVKKGGSFQLNELQGLK	90	113	R	S	0.997		2649.43	5	0.0026	0.96
THYYAVAVVKKGGSFQLNELQGLK	90	113	R	S	0.997		2649.43	4	0.002	0.76
THYYAVAVVKKGGSFQLNELQGLK	90	113	R	S	0.997		2649.43	5	0.0016	0.58
THYYAVAVVKKGGSFQLNELQGLK	90	113	R	S	0.974		2649.42	4	-0.006	-2.3
THYYAVAVVKKGGSFQLNELQGLK	90	113	R	S	0.997		2649.43	4	0.0032	1.2
THYYAVAVVKKGGSFQLNELQGLK	90	113	R	S	0.997		2649.42	5	-0.0034	-1.3
YAVAVVKK	93	100	Y	G	0.99		876.54	2	0.00018	0.2
YAVAVVKKGGSF	93	104	Y	Q	0.997		1224.69	3	-0.0002	-0.16
YAVAVVKKGGSF	93	104	Y	Q	0.997		1224.69	2	-0.001	-0.83
YAVAVVKKGGSF	93	104	Y	Q	0.997		1224.68	3	-0.0023	-1.9
YAVAVVKKGGSF	93	104	Y	Q	0.997		1224.69	2	-2.2e-05	-0.018
YAVAVVKKGGSF	93	104	Y	Q	0.997		1224.69	3	0.0007	0.57
YAVAVVKKGGSF	93	104	Y	Q	0.997		1224.69	3	-0.0002	-0.16
YAVAVVKKGGSF	93	104	Y	Q	0.997		1224.69	2	-0.0012	-1
YAVAVVKKGGSFQ	93	105	Y	L	0.997		1352.75	2	0.00058	0.43
YAVAVVKKGGSFQ	93	105	Y	L	0.997		1352.74	3	-0.0008	-0.59
YAVAVVKKGGSFQL	93	106	Y	N	0.996		1465.82	3	-0.005	-3.4
YAVAVVKKGGSFQLN	93	107	Y	E	0.997		1579.87	2	0.00018	0.11
YAVAVVKKGGSFQLN	93	107	Y	E	0.994		1579.87	3	-0.0002	-0.13
YAVAVVKKGGSFQLN	93	107	Y	E	0.997		1579.87	2	0.00038	0.24
YAVAVVKKGGSFQLNEL	93	109	Y	Q	0.967		1822	3	-0.0002	-0.11
YAVAVVKKGGSFQLNEL	93	109	Y	Q	0.987		1822	2	0.0021	1.1
YAVAVVKKGGSFQLNEL	93	109	Y	Q	0.961		1822	3	0.0007	0.39
YAVAVVKKGGSFQLNELQGL	93	112	Y	K	0.99		2120.15	3	-0.011	-5
YAVAVVKKGGSFQLNELQGL	93	112	Y	K	0.993		2120.16	2	-0.0017	-0.81
YAVAVVKKGGSFQLNELQGL	93	112	Y	K	0.996		2120.16	3	0.0008	0.38
YAVAVVKKGGSFQLNELQGLK	93	113	Y	S	0.997		2248.26	3	0.001	0.45
YAVAVVKKGGSFQLNELQGLK	93	113	Y	S	0.997		2248.26	4	-0.00047	-0.21
YAVAVVKKGGSFQLNELQGLK	93	113	Y	S	0.997		2248.26	3	0.0025	1.1
YAVAVVKKGGSFQLNELQGLKS	93	114	Y	C	0.997		2335.29	3	0.0002	0.086
YAVAVVKKGGSFQLNELQGLKS	93	114	Y	C	0.997		2335.29	4	0.0015	0.65
YAVAVVKKGGSFQLNELQGLKS	93	114	Y	C	0.989		2335.29	3	0.0023	0.99
YAVAVVKKGGSFQLNELQGLKSCH	93	116	Y	T	0.997	Carbamidomethyl (+57)	2632.38	5	-0.00012	-0.044
YAVAVVKKGGSFQLNELQGLKSCH	93	116	Y	T	0.997	Carbamidomethyl (+57)	2632.38	5	0.00038	0.15
YAVAVVKKGGSFQLNELQGLKSCHTGL	93	119	Y	R	0.997	Carbamidomethyl (+57)	2903.53	3	-0.0031	-1.1
YAVAVVKKGGSFQLNELQGLKSCHTGL	93	119	Y	R	0.997	Carbamidomethyl (+57)	2903.53	5	-0.0014	-0.49
YAVAVVKKGGSFQLNELQGLKSCHTGL	93	119	Y	R	0.997	Carbamidomethyl (+57)	2903.53	4	-0.0017	-0.6
YAVAVVKKGGSFQLNELQGLKSCHTGL	93	119	Y	R	0.997	Deamidated (+1), Carbamidomethyl (+57)	2904.54	3	0.022	7.5
YAVAVVKKGGSFQLNELQGLKSCHTGL	93	119	Y	R	0.997	Carbamidomethyl (+57)	2903.53	3	-0.00096	-0.33
YAVAVVKKGGSFQLNELQGLKSCHTGL	93	119	Y	R	0.997	Carbamidomethyl (+57)	2903.53	4	0.00026	0.09
YAVAVVKKGGSFQLNELQGLKSCHTGL	93	119	Y	R	0.997	Carbamidomethyl (+57)	2903.53	5	0.00058	0.2
YAVAVVKKGGSFQLNELQGLKSCHTGLRRTAGW	93	125	Y	N	0.997	Carbamidomethyl (+57)	3630.92	5	-0.0017	-0.47
AVAVVKKGGSF	94	104	Y	Q	0.967		1061.62	2	7.8e-05	0.073
AVAVVKKGGSF	94	104	Y	Q	0.995		1061.62	3	-9.8e-05	-0.092
AVAVVKKGGSF	94	104	Y	Q	0.996		1061.62	2	-0.00052	-0.49
AVAVVKKGGSF	94	104	Y	Q	0.997		1061.62	2	7.8e-05	0.073
AVAVVKKGGSF	94	104	Y	Q	0.993		1061.62	2	-0.00012	-0.11
AVAVVKKGGSF	94	104	Y	Q	0.994		1061.62	3	-0.0004	-0.37
AVAVVKKGGSF	94	104	Y	Q	0.996		1061.62	3	0.0008	0.75
AVAVVKKGGSF	94	104	Y	Q	0.997		1061.62	2	7.8e-05	0.073
AVAVVKKGGSF	94	104	Y	Q	0.997		1061.62	2	-0.00052	-0.49
AVAVVKKGGSF	94	104	Y	Q	0.997		1061.62	2	7.8e-05	0.073
AVAVVKKGGSFQ	94	105	Y	L	0.958		1189.68	2	-0.00052	-0.44
AVAVVKKGGSFQL	94	106	Y	N	0.963		1302.76	2	-0.0064	-4.9
AVAVVKKGGSFQLNEL	94	109	Y	Q	0.99		1658.94	3	-0.0004	-0.24
AVAVVKKGGSFQLNEL	94	109	Y	Q	0.997		1658.94	2	0.00038	0.23
AVAVVKKGGSFQLNEL	94	109	Y	Q	0.997		1658.94	2	0.00038	0.23
AVAVVKKGGSFQLNELQGL	94	112	Y	K	0.966		1957.1	3	0.003	1.5
AVAVVKKGGSFQLNELQGL	94	112	Y	K	0.992		1957.09	3	-0.01	-5.2
AVAVVKKGGSFQLNELQGL	94	112	Y	K	0.997		1957.1	2	0.0016	0.81
AVAVVKKGGSFQLNELQGL	94	112	Y	K	0.997		1957.1	3	0.0015	0.77
AVAVVKKGGSFQLNELQGL	94	112	Y	K	0.981		1957.09	3	-0.01	-5.4
AVAVVKKGGSFQLNELQGL	94	112	Y	K	0.991		1957.09	3	-0.012	-6
AVAVVKKGGSFQLNELQGL	94	112	Y	K	0.995		1957.1	3	-0.0006	-0.31
AVAVVKKGGSFQLNELQGL	94	112	Y	K	0.997		1957.1	2	0.00038	0.19
AVAVVKKGGSFQLNELQGLK	94	113	Y	S	0.997	Deamidated (+1)	2086.19	3	0.015	7.1
AVAVVKKGGSFQLNELQGLK	94	113	Y	S	0.997		2085.19	4	-0.0036	-1.7
AVAVVKKGGSFQLNELQGLK	94	113	Y	S	0.997		2085.2	3	0.0002	0.097
AVAVVKKGGSFQLNELQGLK	94	113	Y	S	0.997		2085.2	4	0.00083	0.4
AVAVVKKGGSFQLNELQGLK	94	113	Y	S	0.997		2085.19	3	-9.8e-05	-0.047
AVAVVKKGGSFQLNELQGLKSCH	94	116	Y	T	0.997	Carbamidomethyl (+57)	2469.31	4	-0.0035	-1.4
AVAVVKKGGSFQLNELQGLKSCH	94	116	Y	T	0.997	Carbamidomethyl (+57)	2469.32	5	0.00018	0.075
AVAVVKKGGSFQLNELQGLKSCHTGL	94	119	Y	R	0.997	Carbamidomethyl (+57)	2740.47	5	-0.0026	-0.95
AVAVVKKGGSFQLNELQGLKSCHTGL	94	119	Y	R	0.997	Carbamidomethyl (+57)	2740.47	4	-0.00084	-0.31
AVAVVKKGGSFQLNELQGLKSCHTGL	94	119	Y	R	0.997	Carbamidomethyl (+57)	2740.47	5	-0.0016	-0.59
AVAVVKKGGSFQLNELQGLKSCHTGL	94	119	Y	R	0.997	Carbamidomethyl (+57)	2740.47	4	-0.0012	-0.45
VAVVKKGGSF	95	104	A	Q	0.993		990.59	2	-2.2e-05	-0.022
VAVVKKGGSF	95	104	A	Q	0.997		990.59	2	-0.00022	-0.22
VAVVKKGGSF	95	104	A	Q	0.98		990.59	3	2e-06	0.002
VAVVKKGGSF	95	104	A	Q	0.997		990.59	2	0.00018	0.18
VAVVKKGGSF	95	104	A	Q	0.997		990.59	2	0.0048	4.8
VAVVKKGGSF	95	104	A	Q	0.997		990.59	2	-2.2e-05	-0.022
AVVKKGGSF	96	104	V	Q	0.994		891.52	2	-0.00022	-0.25
AVVKKGGSFQLNEL	96	109	V	Q	0.988		1488.83	2	-0.0019	-1.3
AVVKKGGSFQLNELQGL	96	112	V	K	0.983		1787	2	0.0011	0.6
AVVKKGGSFQLNELQGL	96	112	V	K	0.995		1787	2	0.0013	0.71
AVVKKGGSFQLNELQGL	96	112	V	K	0.997		1787	3	0.001	0.56
AVVKKGGSFQLNELQGLKS	96	114	V	C	0.997		2002.12	4	-7.4e-05	-0.037
AVVKKGGSFQLNELQGLKS	96	114	V	C	0.997		2002.12	3	-0.0005	-0.25
AVVKKGGSFQLNELQGLKS	96	114	V	C	0.972		2002.13	2	0.0061	3
AVVKKGGSFQLNELQGLKS	96	114	V	C	0.997		2002.12	4	0.00033	0.16
AVVKKGGSFQLNELQGLKS	96	114	V	C	0.997		2002.12	3	-0.0005	-0.25
VVKKGGSF	97	104	A	Q	0.988		820.48	2	-0.00032	-0.39
VVKKGGSF	97	104	A	Q	0.969		820.48	2	-0.00012	-0.15
VVKKGGSFQL	97	106	A	N	0.981		1061.62	2	0.0012	1.1
VVKKGGSFQL	97	106	A	N	0.997		1061.62	2	-0.00062	-0.59
VVKKGGSFQLNEL	97	109	A	Q	0.997		1417.79	2	-0.00022	-0.16
VVKKGGSFQLNEL	97	109	A	Q	0.983		1417.79	3	-0.0002	-0.14
VVKKGGSFQLNEL	97	109	A	Q	0.997		1417.79	2	-0.00042	-0.3
VVKKGGSFQLNELQGL	97	112	A	K	0.968		1715.96	3	-0.001	-0.58
VVKKGGSFQLNELQGL	97	112	A	K	0.996		1715.96	2	0.0018	1
VVKKGGSFQLNELQGL	97	112	A	K	0.952		1715.96	3	-9.8e-05	-0.057
VVKKGGSFQLNELQGL	97	112	A	K	0.991		1715.95	2	-0.0026	-1.5
VVKKGGSFQLNELQGLKS	97	114	A	C	0.981		1931.08	4	-0.00017	-0.09
VVKKGGSFQLNELQGLKS	97	114	A	C	0.997		1931.09	3	0.0014	0.73
VVKKGGSFQLNELQGLKS	97	114	A	C	0.992		1931.08	4	0.00063	0.32
VVKKGGSFQLNELQGLKS	97	114	A	C	0.997		1931.08	3	-0.0013	-0.67
VKKGGSFQLNEL	98	109	V	Q	0.997		1318.72	2	-0.00062	-0.47
VKKGGSFQLNEL	98	109	V	Q	0.983		1318.72	2	-0.00062	-0.47
VKKGGSFQLNELQGL	98	112	V	K	0.975		1616.89	2	0.00078	0.48
VKKGGSFQLNELQGL	98	112	V	K	0.984		1616.89	3	-9.8e-05	-0.061
VKKGGSFQLNELQGL	98	112	V	K	0.954		1616.89	3	-0.0007	-0.43
VKKGGSFQLNELQGLKS	98	114	V	C	0.992		1832.02	3	-0.0004	-0.22
VKKGGSFQLNELQGLKS	98	114	V	C	0.997		1832.01	3	-0.001	-0.54
VKKGGSFQLNELQGLKS	98	114	V	C	0.997		1832.02	3	0.0026	1.4
VKKGGSFQLNELQGLKS	98	114	V	C	0.997		1832.02	2	-0.00042	-0.23
KKGGSFQLN	99	107	V	E	0.982		977.53	2	0.00028	0.28
KKGGSFQLN	99	107	V	E	0.975		977.53	3	-0.0002	-0.2
KKGGSFQLN	99	107	V	E	0.983		977.53	2	-0.00052	-0.53
KKGGSFQLNE	99	108	V	L	0.976		1106.57	2	-0.0021	-1.9
KKGGSFQLNEL	99	109	V	Q	0.997		1219.66	3	0.0001	0.084
KKGGSFQLNEL	99	109	V	Q	0.997		1219.66	2	0.00078	0.64
KKGGSFQLNEL	99	109	V	Q	0.991		1219.66	2	-0.00022	-0.18
KKGGSFQLNEL	99	109	V	Q	0.992		1219.66	3	-0.0005	-0.41
KKGGSFQLNEL	99	109	V	Q	0.988		1219.66	3	-0.0002	-0.16
KKGGSFQLNEL	99	109	V	Q	0.99		1219.66	2	-0.00042	-0.35
KKGGSFQLNELQ	99	110	V	G	0.963		1347.71	2	-0.0018	-1.4
KKGGSFQLNELQ	99	110	V	G	0.995	Deamidated (+1)	1348.7	2	-0.00024	-0.18
KKGGSFQLNELQ	99	110	V	G	0.996		1347.71	2	-0.0022	-1.6
KKGGSFQLNELQGL	99	112	V	K	0.977		1517.82	2	-0.00062	-0.41
KKGGSFQLNELQGL	99	112	V	K	0.99	Deamidated (+1)	1518.81	3	0.0038	2.5
KKGGSFQLNELQGL	99	112	V	K	0.991		1517.82	2	0.00058	0.38
KKGGSFQLNELQGL	99	112	V	K	0.997		1517.82	2	0.00038	0.25
KKGGSFQLNELQGL	99	112	V	K	0.997	Deamidated (+1)	1518.8	2	-0.00084	-0.55
KKGGSFQLNELQGL	99	112	V	K	0.997		1517.82	3	-0.0004	-0.26
KKGGSFQLNELQGL	99	112	V	K	0.997		1517.82	3	0.0032	2.1
KKGGSFQLNELQGL	99	112	V	K	0.997	Deamidated (+1)	1518.81	2	0.003	1.9
KKGGSFQLNELQGL	99	112	V	K	0.997		1517.82	3	-0.0004	-0.26
KKGGSFQLNELQGL	99	112	V	K	0.97	Deamidated (+1)	1518.8	2	-0.0034	-2.3
KKGGSFQLNELQGL	99	112	V	K	0.996	Deamidated (+1)	1518.8	2	-0.00024	-0.16
KKGGSFQLNELQGL	99	112	V	K	0.997		1517.82	2	-0.0014	-0.94
KKGGSFQLNELQGL	99	112	V	K	0.997	Deamidated (+1)	1518.81	3	0.005	3.3
KKGGSFQLNELQGL	99	112	V	K	0.997		1517.82	3	0.0002	0.13
KKGGSFQLNELQGL	99	112	V	K	0.997		1517.82	3	-0.0004	-0.26
KKGGSFQLNELQGL	99	112	V	K	0.997		1517.82	2	-0.00082	-0.54
KKGGSFQLNELQGL	99	112	V	K	0.988		1517.82	3	-0.0007	-0.46
KKGGSFQLNELQGL	99	112	V	K	0.994		1517.82	2	-2.2e-05	-0.014
KKGGSFQLNELQGLK	99	113	V	S	0.997		1645.91	4	-0.003	-1.8
KKGGSFQLNELQGLK	99	113	V	S	0.997		1645.91	4	-0.00057	-0.35
KKGGSFQLNELQGLK	99	113	V	S	0.997		1645.91	3	-0.0026	-1.6
KKGGSFQLNELQGLKS	99	114	V	C	0.992	Deamidated (+1)	1733.93	3	-0.00041	-0.24
KKGGSFQLNELQGLKS	99	114	V	C	0.997	Deamidated (+1)	1733.94	3	0.0056	3.2
KKGGSFQLNELQGLKS	99	114	V	C	0.997		1732.94	4	-0.0026	-1.5
KKGGSFQLNELQGLKS	99	114	V	C	0.997		1732.95	3	-0.0016	-0.92
KKGGSFQLNELQGLKS	99	114	V	C	0.997		1732.95	2	-0.0018	-1.1
KKGGSFQLNELQGLKS	99	114	V	C	0.997		1732.95	3	-9.8e-05	-0.057
KKGGSFQLNELQGLKS	99	114	V	C	0.997		1732.95	3	-9.8e-05	-0.057
KKGGSFQLNELQGLKS	99	114	V	C	0.997		1732.95	4	0.00023	0.13
KKGGSFQLNELQGLKS	99	114	V	C	0.997	Deamidated (+1)	1733.93	2	0.0024	1.4
KKGGSFQLNELQGLKS	99	114	V	C	0.997	Deamidated (+1)	1733.94	4	0.0074	4.3
KKGGSFQLNELQGLKS	99	114	V	C	0.997	Deamidated (+1)	1733.94	3	0.0047	2.7
KKGGSFQLNELQGLKS	99	114	V	C	0.997		1732.95	4	-0.00097	-0.56
KKGGSFQLNELQGLKS	99	114	V	C	0.997		1732.95	2	-0.00062	-0.36
KKGGSFQLNELQGLKSCHTGL	99	119	V	R	0.984	Carbamidomethyl (+57)	2301.19	4	-0.00024	-0.1
KKGGSFQLNELQGLKSCHTGLRRT	99	122	V	A	0.994	Carbamidomethyl (+57)	2714.44	5	0.0019	0.69
KGGSFQLN	100	107	K	E	0.972		849.43	2	-0.00012	-0.14
KGGSFQLNEL	100	109	K	Q	0.996		1091.56	2	0.00018	0.16
KGGSFQLNEL	100	109	K	Q	0.997		1091.56	2	-0.00062	-0.57
KGGSFQLNEL	100	109	K	Q	0.996		1091.56	2	0.00018	0.16
KGGSFQLNELQGL	100	112	K	K	0.997		1389.73	2	0.00058	0.42
KGGSFQLNELQGL	100	112	K	K	0.992	Deamidated (+1)	1390.71	2	0.00076	0.55
KGGSFQLNELQGL	100	112	K	K	0.997	Deamidated (+1)	1390.71	2	0.003	2.1
KGGSFQLNELQGL	100	112	K	K	0.997		1389.73	2	0.0012	0.85
KGGSFQLNELQGL	100	112	K	K	0.984		1389.73	2	0.0014	0.99
KGGSFQLNELQGL	100	112	K	K	0.997		1389.73	2	0.00018	0.13
KGGSFQLNELQGL	100	112	K	K	0.957	Deamidated (+1)	1390.71	2	-0.0032	-2.3
KGGSFQLNELQGL	100	112	K	K	0.991		1389.73	2	0.00038	0.27
KGGSFQLNELQGL	100	112	K	K	0.997	Deamidated (+1)	1390.71	2	0.0024	1.7
KGGSFQLNELQGLK	100	113	K	S	0.979	Deamidated (+1)	1518.81	3	0.0041	2.7
KGGSFQLNELQGLK	100	113	K	S	0.994		1517.82	3	-0.0019	-1.2
KGGSFQLNELQGLK	100	113	K	S	0.996	Deamidated (+1)	1518.8	2	0.00036	0.24
KGGSFQLNELQGLK	100	113	K	S	0.997	Deamidated (+1)	1518.8	3	-0.0019	-1.3
KGGSFQLNELQGLK	100	113	K	S	0.997		1517.82	3	-0.0034	-2.2
KGGSFQLNELQGLK	100	113	K	S	0.997	Deamidated (+1)	1518.81	2	0.0042	2.7
KGGSFQLNELQGLK	100	113	K	S	0.997		1517.82	3	-0.0004	-0.26
KGGSFQLNELQGLK	100	113	K	S	0.997		1517.82	2	-0.0012	-0.8
KGGSFQLNELQGLK	100	113	K	S	0.971		1517.82	3	-0.001	-0.66
KGGSFQLNELQGLK	100	113	K	S	0.996		1517.82	3	-0.001	-0.66
KGGSFQLNELQGLK	100	113	K	S	0.997		1517.82	3	0.0029	1.9
KGGSFQLNELQGLK	100	113	K	S	0.997		1517.82	3	-0.001	-0.66
KGGSFQLNELQGLK	100	113	K	S	0.997	Deamidated (+1)	1518.81	3	0.0026	1.7
KGGSFQLNELQGLK	100	113	K	S	0.997		1517.82	2	-0.0012	-0.8
KGGSFQLNELQGLK	100	113	K	S	0.997	Deamidated (+1)	1518.82	3	0.014	9
KGGSFQLNELQGLK	100	113	K	S	0.997	Deamidated (+1)	1518.81	3	0.0011	0.71
KGGSFQLNELQGLK	100	113	K	S	0.997		1517.82	2	-0.0016	-1.1
KGGSFQLNELQGLK	100	113	K	S	0.997		1517.82	3	0.0002	0.13
KGGSFQLNELQGLK	100	113	K	S	0.997		1517.82	3	-0.0007	-0.46
KGGSFQLNELQGLK	100	113	K	S	0.997	Deamidated (+1)	1518.81	2	0.00096	0.63
KGGSFQLNELQGLK	100	113	K	S	0.997		1517.82	2	-0.0022	-1.5
KGGSFQLNELQGLK	100	113	K	S	0.997		1517.82	3	-9.8e-05	-0.065
KGGSFQLNELQGLK	100	113	K	S	0.997		1517.82	3	-0.0004	-0.26
KGGSFQLNELQGLK	100	113	K	S	0.997		1517.82	2	-0.00062	-0.41
KGGSFQLNELQGLKS	100	114	K	C	0.961		1604.85	3	-0.0024	-1.5
KGGSFQLNELQGLKSCHTGL	100	119	K	R	0.997	Carbamidomethyl (+57)	2173.1	3	0.00094	0.43
KGGSFQLNELQGLKSCHTGL	100	119	K	R	0.997	Carbamidomethyl (+57)	2173.1	4	-3.9e-05	-0.018
KGGSFQLNELQGLKSCHTGL	100	119	K	R	0.997	Carbamidomethyl (+57)	2173.09	3	-0.0021	-0.95
KGGSFQLNELQGLKSCHTGLR	100	120	K	R	0.99	Carbamidomethyl (+57)	2329.2	5	0.00018	0.079
KGGSFQLNELQGLKSCHTGLR	100	120	K	R	0.997	Carbamidomethyl (+57)	2329.2	3	0.0021	0.92
KGGSFQLNELQGLKSCHTGLR	100	120	K	R	0.997	Carbamidomethyl (+57)	2329.2	3	0.00064	0.27
KGGSFQLNELQGLKSCHTGLR	100	120	K	R	0.997	Carbamidomethyl (+57)	2329.2	4	6.1e-05	0.026
KGGSFQLNELQGLKSCHTGLR	100	120	K	R	0.977	Carbamidomethyl (+57)	2329.2	4	0.0017	0.71
KGGSFQLNELQGLKSCHTGLR	100	120	K	R	0.997	Carbamidomethyl (+57)	2329.19	5	-0.0018	-0.78
KGGSFQLNELQGLKSCHTGLR	100	120	K	R	0.997	Carbamidomethyl (+57)	2329.2	4	0.00046	0.2
GGSFQLNELQGL	101	112	K	K	0.991		1261.63	2	0.00058	0.46
GGSFQLNELQGL	101	112	K	K	0.987		1261.63	2	0.0014	1.1
GGSFQLNELQGL	101	112	K	K	0.953		1261.63	2	-0.001	-0.81
GGSFQLNELQGLK	101	113	K	S	0.997	Deamidated (+1)	1390.72	2	0.0072	5.1
GGSFQLNELQGLK	101	113	K	S	0.997	Deamidated (+1)	1390.71	2	0.0032	2.3
GGSFQLNELQGLK	101	113	K	S	0.997	Deamidated (+1)	1390.71	2	-0.00084	-0.6
GGSFQLNELQGLK	101	113	K	S	0.997		1389.72	2	-0.0014	-1
GGSFQLNELQGLK	101	113	K	S	0.997		1389.73	2	0.0012	0.85
GGSFQLNELQGLK	101	113	K	S	0.997		1389.72	2	-0.00082	-0.59
GGSFQLNELQGLK	101	113	K	S	0.997		1389.73	2	0.00078	0.56
GGSFQLNELQGLK	101	113	K	S	0.997	Deamidated (+1)	1390.71	2	0.0024	1.7
GGSFQLNELQGLK	101	113	K	S	0.997	Deamidated (+1)	1390.71	2	-0.0036	-2.6
GGSFQLNELQGLK	101	113	K	S	0.997	Deamidated (+1)	1390.72	2	0.0084	6
GGSFQLNELQGLK	101	113	K	S	0.997	Deamidated (+1)	1390.71	2	0.0038	2.7
GGSFQLNELQGLK	101	113	K	S	0.997		1389.73	2	0.0014	0.99
GGSFQLNELQGLK	101	113	K	S	0.997	Deamidated (+1)	1390.72	2	0.0076	5.4
GGSFQLNELQGLK	101	113	K	S	0.997		1389.73	2	-0.00022	-0.16
GGSFQLNELQGLK	101	113	K	S	0.997		1389.73	2	-0.00042	-0.3
GGSFQLNELQGLK	101	113	K	S	0.978		1389.72	2	-0.00062	-0.45
GGSFQLNELQGLKS	101	114	K	C	0.997		1476.75	2	-0.005	-3.4
GGSFQLNELQGLKSCHTGLR	101	120	K	R	0.997	Deamidated (+1), Carbamidomethyl (+57)	2202.1	3	0.019	8.5
GGSFQLNELQGLKSCHTGLR	101	120	K	R	0.997	Carbamidomethyl (+57)	2201.1	3	0.001	0.47
GGSFQLNELQGLKSCHTGLR	101	120	K	R	0.997	Carbamidomethyl (+57)	2201.1	3	-0.00016	-0.074
GGSFQLNELQGLKSCHTGLR	101	120	K	R	0.997	Carbamidomethyl (+57)	2201.11	4	0.0067	3
GGSFQLNELQGLKSCHTGLR	101	120	K	R	0.997	Carbamidomethyl (+57)	2201.1	3	-0.0062	-2.8
GGSFQLNELQGLKSCHTGLRR	101	121	K	T	0.997	Carbamidomethyl (+57)	2357.21	4	0.006	2.5
GGSFQLNELQGLKSCHTGLRR	101	121	K	T	0.997	Carbamidomethyl (+57)	2357.2	5	-0.00092	-0.39
GSFQLNELQGL	102	112	G	K	0.997		1204.61	2	0.00048	0.4
GSFQLNELQGL	102	112	G	K	0.967		1204.61	2	0.0019	1.6
GSFQLNELQGL	102	112	G	K	0.997		1204.61	2	0.0011	0.89
GSFQLNELQGLKS	102	114	G	C	0.997		1419.74	2	-0.00012	-0.086
GSFQLNELQGLKS	102	114	G	C	0.997		1419.74	2	-0.00092	-0.65
SFQLNELQGL	103	112	G	K	0.997		1147.59	2	0.00058	0.5
SFQLNELQGL	103	112	G	K	0.997		1147.59	2	0.00078	0.68
SFQLNELQGLKS	103	114	G	C	0.997		1362.71	2	-0.0036	-2.7
SFQLNELQGLKS	103	114	G	C	0.997		1362.71	2	-0.001	-0.75
QLNELQGL	105	112	F	K	0.977		913.49	2	-2.2e-05	-0.024
QLNELQGL	105	112	F	K	0.957		913.49	2	0.00018	0.19
QLNELQGLK	105	113	F	S	0.989		1041.58	2	0.00098	0.94
QLNELQGLK	105	113	F	S	0.997		1041.58	2	0.00018	0.17
QLNELQGLK	105	113	F	S	0.997		1041.58	2	-0.00082	-0.79
QLNELQGLKS	105	114	F	C	0.997		1128.61	2	-0.001	-0.9
QLNELQGLKS	105	114	F	C	0.997		1128.61	2	-0.00042	-0.37
QLNELQGLKSCH	105	116	F	T	0.997	Carbamidomethyl (+57)	1425.7	3	-0.00036	-0.25
QLNELQGLKSCH	105	116	F	T	0.997	Carbamidomethyl (+57)	1425.7	2	0.00021	0.15
QLNELQGLKSCH	105	116	F	T	0.997	Carbamidomethyl (+57)	1425.71	2	0.0014	0.99
QLNELQGLKSCH	105	116	F	T	0.997	Carbamidomethyl (+57)	1425.7	3	-0.00036	-0.25
QLNELQGLKSCHTGL	105	119	F	R	0.997	Carbamidomethyl (+57)	1696.86	2	-0.00069	-0.4
QLNELQGLKSCHTGL	105	119	F	R	0.997	Carbamidomethyl (+57)	1696.86	3	-0.00016	-0.096
QLNELQGLKSCHTGL	105	119	F	R	0.997	Carbamidomethyl (+57)	1696.85	3	-0.0032	-1.9
QLNELQGLKSCHTGL	105	119	F	R	0.997	Carbamidomethyl (+57)	1696.86	2	-0.00069	-0.4
QGLKSCHTGL	110	119	L	R	0.997	Carbamidomethyl (+57)	1099.55	2	0.0048	4.4
QGLKSCHTGL	110	119	L	R	0.997	Carbamidomethyl (+57)	1099.54	2	0.00021	0.19
GLKSCHTGL	111	119	Q	R	0.953	Carbamidomethyl (+57)	971.49	3	-0.00016	-0.17
GLKSCHTGL	111	119	Q	R	0.997	Carbamidomethyl (+57)	971.49	2	0.00021	0.22
GLKSCHTGL	111	119	Q	R	0.992	Carbamidomethyl (+57)	971.49	2	-0.00059	-0.6
KSCHTGLRRT	113	122	L	A	0.995	Carbamidomethyl (+57)	1214.63	3	-0.0017	-1.4
SCHTGLRR	114	121	K	T	0.95	Carbamidomethyl (+57)	985.49	2	-0.00019	-0.19
SCHTGLRR	114	121	K	T	0.99	Carbamidomethyl (+57)	985.49	3	0.0013	1.4
SCHTGLRR	114	121	K	T	0.99	Carbamidomethyl (+57)	985.49	2	1.3e-05	0.013
CHTGLRRT	115	122	S	A	0.99	Carbamidomethyl (+57)	999.5	3	-0.00016	-0.16
CHTGLRRT	115	122	S	A	0.982	Carbamidomethyl (+57)	999.5	2	-8.7e-05	-0.087
CHTGLRRT	115	122	S	A	0.99	Carbamidomethyl (+57)	999.5	3	0.00044	0.44
CHTGLRRT	115	122	S	A	0.99	Carbamidomethyl (+57)	999.5	1	-0.0016	-1.6
CHTGLRRTA	115	123	S	G	0.997	Carbamidomethyl (+57)	1070.54	2	-0.00019	-0.17
RRTAGWNVPIGTLRPF	120	135	L	L	0.983		1840.02	3	-0.0006	-0.32
RTAGWNVPIGTLR	121	133	R	P	0.997		1439.8	3	0.0001	0.071
RTAGWNVPIGTLR	121	133	R	P	0.997		1439.8	2	-0.0034	-2.4
RTAGWNVPIGTLR	121	133	R	P	0.997		1439.8	2	-0.0018	-1.3
RTAGWNVPIGTLR	121	133	R	P	0.997		1439.8	3	-0.0026	-1.8
RTAGWNVPIGTLRPFLNWTGPPEPIEAAVAR	121	151	R	F	0.948	N-Glycan (+2425)	5811.72	4	1.1	180
RTAGWNVPIGTLRPFLNWTGPPEPIEAAVAR	121	151	R	F	0.972	Deamidated (+1), N-Glycan (+2717)	6104.77	4	1	160
RTAGWNVPIGTLRPFLNWTGPPEPIEAAVAR	121	151	R	F	0.98	N-Glycan (+2061)	5446.57	4	0.01	1.9
RTAGWNVPIGTLRPFLNWTGPPEPIEAAVAR	121	151	R	F	0.997	N-Glycan (+2206)	5591.6	4	0.0011	0.2
RTAGWNVPIGTLRPFLNWTGPPEPIEAAVAR	121	151	R	F	0.991	N-Glycan (+1727)	5111.38	4	-1	-200
RTAGWNVPIGTLRPFLNWTGPPEPIEAAVAR	121	151	R	F	0.992	Deamidated (+1), N-Glycan (+1541)	4928.33	4	1	200
RTAGWNVPIGTLRPFLNWTGPPEPIEAAVAR	121	151	R	F	0.997	Phospho (+80), N-Glycan (+1727)	5191.34	4	-1	-200
RTAGWNVPIGTLRPFLNWTGPPEPIEAAVAR	121	151	R	F	0.997	N-Glycan (+2027)	5412.49	4	-0.0052	-0.96
RTAGWNVPIGTLRPFLNWTGPPEPIEAAVAR	121	151	R	F	0.997	N-Glycan (+1216)	4602.23	4	0.007	1.5
RTAGWNVPIGTLRPFLNWTGPPEPIEAAVAR	121	151	R	F	0.997	N-Glycan (+1865)	5249.43	4	-1	-190
RTAGWNVPIGTLRPFLNWTGPPEPIEAAVAR	121	151	R	F	0.997		3385.8	4	-0.00097	-0.29
RTAGWNVPIGTLRPFLNWTGPPEPIEAAVAR	121	151	R	F	0.997		3385.8	4	-0.0058	-1.7
RTAGWNVPIGTLRPFLNWTGPPEPIEAAVAR	121	151	R	F	0.997		3385.8	3	-0.0029	-0.86
TAGWNVPIGTLR	122	133	R	P	0.997		1283.7	2	-0.00012	-0.095
TAGWNVPIGTLR	122	133	R	P	0.997		1283.7	2	0.0013	0.99
TAGWNVPIGTLR	122	133	R	P	0.997		1283.7	2	0.0011	0.84
TAGWNVPIGTLR	122	133	R	P	0.997		1283.7	2	0.00048	0.37
TAGWNVPIGTLRPF	122	135	R	L	0.997		1527.82	2	0.0015	0.97
TAGWNVPIGTLRPFLNWTGPPEPIEAAVAR	122	151	R	F	0.962	N-Glycan (+2263)	5493.52	4	1	180
TAGWNVPIGTLRPFLNWTGPPEPIEAAVAR	122	151	R	F	0.965	N-Glycan (+2408)	5638.59	4	1	180
TAGWNVPIGTLRPFLNWTGPPEPIEAAVAR	122	151	R	F	0.979	N-Glycan (+2222)	5452.53	4	1	190
TAGWNVPIGTLRPFLNWTGPPEPIEAAVAR	122	151	R	F	0.98	N-Glycan (+2061)	5290.47	4	0.0076	1.4
TAGWNVPIGTLRPFLNWTGPPEPIEAAVAR	122	151	R	F	0.995	N-Glycan (+2206)	5434.5	4	-1	-180
TAGWNVPIGTLRPFLNWTGPPEPIEAAVAR	122	151	R	F	0.995	N-Glycan (+2076)	5304.44	4	-0.99	-190
TAGWNVPIGTLRPFLNWTGPPEPIEAAVAR	122	151	R	F	0.995	N-Glycan (+2571)	5801.65	4	1	180
TAGWNVPIGTLRPFLNWTGPPEPIEAAVAR	122	151	R	F	0.995	N-Glycan (+2206)	5435.51	4	0.01	1.9
TAGWNVPIGTLRPFLNWTGPPEPIEAAVAR	122	151	R	F	0.996	N-Glycan (+2060)	5289.46	4	0.02	3.8
TAGWNVPIGTLRPFLNWTGPPEPIEAAVAR	122	151	R	F	0.996	N-Glycan (+2352)	5580.55	4	-1	-180
TAGWNVPIGTLRPFLNWTGPPEPIEAAVAR	122	151	R	F	0.997	N-Glycan (+2935)	6165.79	4	1	170
TAGWNVPIGTLRPFLNWTGPPEPIEAAVAR	122	151	R	F	0.997	N-Glycan (+2206)	5436.51	4	1	190
TAGWNVPIGTLRPFLNWTGPPEPIEAAVAR	122	151	R	F	0.997	N-Glycan (+2206)	5436.48	4	0.98	180
TAGWNVPIGTLRPFLNWTGPPEPIEAAVAR	122	151	R	F	0.997	N-Glycan (+1769)	4998.35	4	0.011	2.3
TAGWNVPIGTLRPFLNWTGPPEPIEAAVAR	122	151	R	F	0.997	N-Glycan (+2864)	6092.74	4	-1	-160
TAGWNVPIGTLRPFLNWTGPPEPIEAAVAR	122	151	R	F	0.997	N-Glycan (+2077)	5307.47	4	1	190
TAGWNVPIGTLRPFLNWTGPPEPIEAAVAR	122	151	R	F	0.997	N-Glycan (+1550)	4780.27	3	1	210
TAGWNVPIGTLRPFLNWTGPPEPIEAAVAR	122	151	R	F	0.997	N-Glycan (+2571)	5800.63	4	0.0019	0.32
TAGWNVPIGTLRPFLNWTGPPEPIEAAVAR	122	151	R	F	0.997	N-Glycan (+1915)	5144.41	5	0.0073	1.4
TAGWNVPIGTLRPFLNWTGPPEPIEAAVAR	122	151	R	F	0.997	N-Glycan (+2060)	5289.43	4	-0.0039	-0.74
TAGWNVPIGTLRPFLNWTGPPEPIEAAVAR	122	151	R	F	0.997	N-Glycan (+2280)	5508.53	4	-1	-180
TAGWNVPIGTLRPFLNWTGPPEPIEAAVAR	122	151	R	F	0.997	N-Glycan (+2206)	5435.5	4	0.0062	1.1
TAGWNVPIGTLRPFLNWTGPPEPIEAAVAR	122	151	R	F	0.997		3229.71	4	0.0025	0.78
TAGWNVPIGTLRPFLNWTGPPEPIEAAVAR	122	151	R	F	0.997		3229.71	3	0.0022	0.68
TAGWNVPIGTLRPFLNWTGPPEPIEAAVAR	122	151	R	F	0.977	Phospho (+80), N-Glycan (+2757)	6066.65	4	-0.0084	-1.4
TAGWNVPIGTLRPFLNWTGPPEPIEAAVAR	122	151	R	F	0.997		3229.71	3	0.0022	0.68
TAGWNVPIGTLRPFLNWTGPPEPIEAAVAR	122	151	R	F	0.997		3229.71	3	0.0022	0.68
TAGWNVPIGTLRPFLNWTGPPEPIEAAVAR	122	151	R	F	0.997	N-Glycan (+2044)	5273.42	4	-0.025	-4.8
TAGWNVPIGTLRPFLNWTGPPEPIEAAVAR	122	151	R	F	0.997		3229.7	4	-0.0063	-1.9
TAGWNVPIGTLRPFLNWTGPPEPIEAAVAR	122	151	R	F	0.997	Phospho (+80), N-Glycan (+1541)	4850.21	4	0.008	1.7
TAGWNVPIGTLRPFLNWTGPPEPIEAAVAR	122	151	R	F	0.997	Phospho (+80), N-Glycan (+1703)	5012.24	5	-0.013	-2.6
TAGWNVPIGTLRPFLNWTGPPEPIEAAVAR	122	151	R	F	0.997	N-Glycan (+1865)	5094.34	4	0.00077	0.15
TAGWNVPIGTLRPFLNWTGPPEPIEAAVAR	122	151	R	F	0.997	Phospho (+80), N-Glycan (+1378)	4688.15	4	0.00089	0.19
TAGWNVPIGTLRPFLNWTGPPEPIEAAVAR	122	151	R	F	0.997	N-Glycan (+2044)	5273.41	4	-0.029	-5.5
TAGWNVPIGTLRPFLNWTGPPEPIEAAVAR	122	151	R	F	0.997		3229.71	4	0.0017	0.53
TAGWNVPIGTLRPFLNWTGPPEPIEAAVAR	122	151	R	F	0.997	Phospho (+80), N-Glycan (+1703)	5012.26	4	0.011	2.3
TAGWNVPIGTLRPFLNWTGPPEPIEAAVAR	122	151	R	F	0.997		3229.72	3	0.011	3.5
TAGWNVPIGTLRPFLNWTGPPEPIEAAVAR	122	151	R	F	0.997	N-Glycan (+1703)	4933.3	4	1	210
TAGWNVPIGTLRPFLNWTGPPEPIEAAVAR	122	151	R	F	0.997		3229.71	3	0.0052	1.6
TAGWNVPIGTLRPFLNWTGPPEPIEAAVAR	122	151	R	F	0.997	N-Glycan (+1378)	4608.18	3	-0.00051	-0.11
TAGWNVPIGTLRPFLNWTGPPEPIEAAVAR	122	151	R	F	0.997	N-Glycan (+1216)	4446.13	3	0.0014	0.3
TAGWNVPIGTLRPFLNWTGPPEPIEAAVAR	122	151	R	F	0.997		3229.7	3	-0.0038	-1.2
TAGWNVPIGTLRPFLNWTGPPEPIEAAVAR	122	151	R	F	0.997	N-Glycan (+1216)	4446.13	3	-0.0016	-0.37
TAGWNVPIGTLRPFLNWTGPPEPIEAAVAR	122	151	R	F	0.997	N-Glycan (+2675)	5903.6	4	-1	-180
TAGWNVPIGTLRPFLNWTGPPEPIEAAVAR	122	151	R	F	0.997		3229.7	4	-0.00027	-0.085
TAGWNVPIGTLRPFLNWTGPPEPIEAAVAR	122	151	R	F	0.997	N-Glycan (+1378)	4609.15	3	0.97	210
TAGWNVPIGTLRPFLNWTGPPEPIEAAVAR	122	151	R	F	0.997	N-Glycan (+2027)	5256.39	4	-0.0041	-0.78
TAGWNVPIGTLRPFLNWTGPPEPIEAAVAR	122	151	R	F	0.997		3229.7	3	-0.0008	-0.25
TAGWNVPIGTLRPFLNWTGPPEPIEAAVAR	122	151	R	F	0.997		3229.7	3	-0.0038	-1.2
AGWNVPIGT	123	131	T	L	0.988		913.47	2	0.00018	0.19
AGWNVPIGT	123	131	T	L	0.997		913.47	2	-0.00022	-0.24
AGWNVPIGTL	123	132	T	R	0.997		1026.55	2	-0.00032	-0.31
AGWNVPIGTL	123	132	T	R	0.997		1026.55	2	7.8e-05	0.076
AGWNVPIGTLRPFLNWTGPPEPI	123	145	T	E	0.997		2531.33	3	0.0012	0.47
AGWNVPIGTLRPFLNWTGPPEPI	123	145	T	E	0.997		2531.34	2	0.0026	1
AGWNVPIGTLRPFLNWTGPPEPIEA	123	147	T	A	0.997		2731.42	3	0.0029	1.1
AGWNVPIGTLRPFLNWTGPPEPIEA	123	147	T	A	0.997		2731.42	2	0.0089	3.2
AGWNVPIGTLRPFLNWTGPPEPIEAA	123	148	T	V	0.987		2802.46	3	0.0064	2.3
GWNVPIGT	124	131	A	L	0.968		842.43	2	-0.00012	-0.14
GWNVPIGT	124	131	A	L	0.99		842.43	2	0.00028	0.33
GWNVPIGTLRPF	124	135	A	L	0.997		1355.73	2	-0.0011	-0.83
GWNVPIGTLRPF	124	135	A	L	0.997		1355.74	2	-0.00012	-0.09
GWNVPIGTLRPFLNWTGPPEPI	124	145	A	E	0.997		2460.3	3	-0.0002	-0.08
GWNVPIGTLRPFLNWTGPPEPI	124	145	A	E	0.997		2460.3	2	0.0017	0.68
NVPIGTLRPF	126	135	W	L	0.995		1112.63	2	0.00048	0.43
NVPIGTLRPF	126	135	W	L	0.956		1112.63	2	7.8e-05	0.07
NVPIGTLRPF	126	135	W	L	0.995		1112.63	2	-0.0011	-1
NVPIGTLRPF	126	135	W	L	0.997		1112.63	2	7.8e-05	0.07
NVPIGTLRPF	126	135	W	L	0.997		1112.63	2	0.00028	0.25
NVPIGTLRPF	126	135	W	L	0.988		1112.63	2	-0.00092	-0.83
NVPIGTLRPF	126	135	W	L	0.99		1112.63	2	-0.00052	-0.47
NVPIGTLRPFL	126	136	W	N	0.969		1225.72	2	-0.00042	-0.34
NVPIGTLRPFL	126	136	W	N	0.995		1225.72	2	0.00058	0.47
VPIGTLRPF	127	135	N	L	0.994		998.59	2	0.00058	0.58
VPIGTLRPF	127	135	N	L	0.975		998.59	2	-0.00022	-0.22
PIGTLRPF	128	135	V	L	0.973		899.52	2	0.0016	1.8
PIGTLRPF	128	135	V	L	0.984		899.52	2	0.00098	1.1
PIGTLRPF	128	135	V	L	0.976		899.52	2	-0.00022	-0.25
PIGTLRPF	128	135	V	L	0.977		899.52	2	0.00018	0.2
GTLRPFLN	130	137	I	W	0.988		916.51	2	-0.0023	-2.5
GTLRPFLNWT	130	139	I	G	0.995		1203.64	2	7.8e-05	0.065
GTLRPFLNWTGPPEPI	130	145	I	E	0.997		1793.95	2	0.00068	0.38
GTLRPFLNWTGPPEPI	130	145	I	E	0.997		1793.95	2	0.0025	1.4
GTLRPFLNWTGPPEPI	130	145	I	E	0.997		1793.95	2	0.00028	0.15
GTLRPFLNWTGPPEPI	130	145	I	E	0.997		1793.95	2	0.0023	1.3
GTLRPFLNWTGPPEPI	130	145	I	E	0.997		1793.95	2	-0.0015	-0.85
GTLRPFLNWTGPPEPI	130	145	I	E	0.997		1793.95	2	-0.00072	-0.4
GTLRPFLNWTGPPEPI	130	145	I	E	0.997		1793.95	2	0.0037	2
GTLRPFLNWTGPPEPIEA	130	147	I	A	0.997		1994.03	2	0.00038	0.19
GTLRPFLNWTGPPEPIEA	130	147	I	A	0.997		1994.03	2	0.0016	0.79
GTLRPFLNWTGPPEPIEA	130	147	I	A	0.997		1994.03	2	0.004	2
GTLRPFLNWTGPPEPIEA	130	147	I	A	0.997		1994.03	2	0.0018	0.89
GTLRPFLNWTGPPEPIEA	130	147	I	A	0.997		1994.03	3	0.0067	3.4
GTLRPFLNWTGPPEPIEAA	130	148	I	V	0.989		2065.07	2	0.0039	1.9
GTLRPFLNWTGPPEPIEAA	130	148	I	V	0.997		2065.07	3	0.0039	1.9
GTLRPFLNWTGPPEPIEAA	130	148	I	V	0.997		2065.07	2	0.0039	1.9
TLRPFLNWTGPPEPI	131	145	G	E	0.997		1736.93	2	0.002	1.1
LRPFLNWT	132	139	T	G	0.99		1045.57	2	0.00028	0.27
LRPFLNWTGPPEPI	132	145	T	E	0.989		1635.88	2	0.0013	0.78
LRPFLNWTGPPEPI	132	145	T	E	0.993		1635.88	2	-0.00012	-0.075
LRPFLNWTGPPEPI	132	145	T	E	0.997		1635.87	2	-0.0037	-2.3
LRPFLNWTGPPEPI	132	145	T	E	0.997		1635.88	2	0.0017	1
LRPFLNWTGPPEPI	132	145	T	E	0.997		1635.88	2	0.0015	0.9
LRPFLNWTGPPEPI	132	145	T	E	0.997		1635.88	2	0.0021	1.3
LRPFLNWTGPPEPI	132	145	T	E	0.997	Deamidated (+1)	1636.86	2	0.0011	0.65
LRPFLNWTGPPEPI	132	145	T	E	0.997		1635.88	2	0.0025	1.5
LRPFLNWTGPPEPIEA	132	147	T	A	0.997		1835.96	2	-0.0014	-0.77
LRPFLNWTGPPEPIEAA	132	148	T	V	0.997		1907	2	0.0033	1.7
RPFLNWTGPPEPI	133	145	L	E	0.957	Deamidated (+1)	1523.78	2	0.0046	3
RPFLNWTGPPEPI	133	145	L	E	0.967		1522.79	2	-0.00062	-0.41
RPFLNWTGPPEPI	133	145	L	E	0.997		1522.79	2	0.0012	0.77
RPFLNWTGPPEPI	133	145	L	E	0.994		1522.79	2	0.0014	0.9
RPFLNWTGPPEPIEA	133	147	L	A	0.997		1722.87	2	-0.00032	-0.19
RPFLNWTGPPEPIEA	133	147	L	A	0.997		1722.87	2	-0.0045	-2.6
RPFLNWTGPPEPIEAA	133	148	L	V	0.997		1793.92	2	0.0058	3.2
PFLNWTGPPEPIEAAVAR	134	151	R	F	0.977	N-Glycan (+1914)	3877.7	3	0.01	2.7
PFLNWTGPPEPIEAAVAR	134	151	R	F	0.985	N-Glycan (+2408)	4370.88	3	-0.99	-230
PFLNWTGPPEPIEAAVAR	134	151	R	F	0.988	N-Glycan (+2351)	4314.85	3	0.0051	1.2
PFLNWTGPPEPIEAAVAR	134	151	R	F	0.997	N-Glycan (+2263)	4226.84	3	0.0072	1.7
PFLNWTGPPEPIEAAVAR	134	151	R	F	0.997	N-Glycan (+2061)	4024.77	3	0.001	0.26
PFLNWTGPPEPIEAAVAR	134	151	R	F	0.997	N-Glycan (+2061)	4024.76	3	-0.008	-2
PFLNWTGPPEPIEAAVAR	134	151	R	F	0.997	N-Glycan (+1915)	3878.7	3	-0.011	-2.8
PFLNWTGPPEPIEAAVAR	134	151	R	F	0.978	N-Glycan (+1216)	3180.43	2	-0.0052	-1.6
PFLNWTGPPEPIEAAVAR	134	151	R	F	0.996	N-Glycan (+1541)	3504.53	3	-0.014	-4
PFLNWTGPPEPIEAAVAR	134	151	R	F	0.997	N-Glycan (+1216)	3180.43	2	-0.0052	-1.6
PFLNWTGPPEPIEAAVAR	134	151	R	F	0.997	N-Glycan (+1541)	3504.54	3	-0.0022	-0.62
PFLNWTGPPEPIEAAVAR	134	151	R	F	0.997	N-Glycan (+1703)	3666.6	3	-0.0009	-0.24
PFLNWTGPPEPIEAAVAR	134	151	R	F	0.997	N-Glycan (+1378)	3342.49	3	-0.0063	-1.9
PFLNWTGPPEPIEAAVAR	134	151	R	F	0.997	N-Glycan (+1378)	3342.5	3	0.0057	1.7
PFLNWTGPPEPIEAAVAR	134	151	R	F	0.997	N-Glycan (+1216)	3180.44	3	0.0016	0.49
PFLNWTGPPEPIEAAVAR	134	151	R	F	0.997		1964.02	2	0.0011	0.55
PFLNWTGPPEPIEAAVAR	134	151	R	F	0.997		1964.02	3	0.0003	0.15
PFLNWTGPPEPIEAAVAR	134	151	R	F	0.997		1964.02	3	0.0015	0.76
FLNWTGPPEPI	135	145	P	E	0.997		1269.64	2	0.0011	0.85
FLNWTGPPEPIEA	135	147	P	A	0.997		1469.72	2	-0.0012	-0.83
FLNWTGPPEPIEAA	135	148	P	V	0.997		1540.76	2	0.0015	0.96
FLNWTGPPEPIEAAVA	135	150	P	R	0.997		1710.86	2	0.00098	0.57
FLNWTGPPEPIEAAVARF	135	152	P	F	0.997		2014.03	2	7.8e-05	0.039
FLNWTGPPEPIEAAVARF	135	152	P	F	0.997		2014.03	2	7.8e-05	0.039
FLNWTGPPEPIEAAVARF	135	152	P	F	0.997		2014.03	3	-0.0002	-0.098
LNWTGPPEPI	136	145	F	E	0.973	Deamidated (+1)	1123.56	2	0.00046	0.41
LNWTGPPEPI	136	145	F	E	0.997		1122.57	2	-0.00012	-0.11
LNWTGPPEPIEA	136	147	F	A	0.976		1322.65	2	0.0014	1
LNWTGPPEPIEA	136	147	F	A	0.992		1322.65	2	0.0012	0.89
LNWTGPPEPIEAA	136	148	F	V	0.997		1393.69	2	0.00048	0.34
LNWTGPPEPIEAA	136	148	F	V	0.997		1393.69	2	0.0011	0.77
LNWTGPPEPIEAAVA	136	150	F	R	0.997		1563.79	2	-2.2e-05	-0.014
LNWTGPPEPIEAAVA	136	150	F	R	0.997	Deamidated (+1)	1564.78	2	0.00036	0.23
LNWTGPPEPIEAAVA	136	150	F	R	0.997		1563.8	2	0.002	1.3
LNWTGPPEPIEAAVAR	136	151	F	F	0.997		1719.89	2	-0.00052	-0.3
LNWTGPPEPIEAAVAR	136	151	F	F	0.997		1719.89	3	0.0001	0.059
LNWTGPPEPIEAAVARF	136	152	F	F	0.997		1866.96	2	-0.00052	-0.28
LNWTGPPEPIEAAVARF	136	152	F	F	0.997		1866.95	3	-0.012	-6.5
LNWTGPPEPIEAAVARF	136	152	F	F	0.997		1866.96	2	-0.0059	-3.2
LNWTGPPEPIEAAVARF	136	152	F	F	0.997		1866.96	2	-0.00052	-0.28
LNWTGPPEPIEAAVARF	136	152	F	F	0.997		1866.96	3	0.001	0.54
LNWTGPPEPIEAAVARFF	136	153	F	S	0.997		2014.03	3	0.0007	0.35
LNWTGPPEPIEAAVARFF	136	153	F	S	0.997		2014.03	2	0.0021	1
LNWTGPPEPIEAAVARFF	136	153	F	S	0.997		2014.03	3	0.0007	0.35
NWTGPPEPI	137	145	L	E	0.997		1009.49	2	-2.2e-05	-0.022
NWTGPPEPIEA	137	147	L	A	0.987		1209.57	2	0.00028	0.23
NWTGPPEPIEAA	137	148	L	V	0.997		1280.61	2	0.0016	1.2
NWTGPPEPIEAAVA	137	150	L	R	0.986		1450.71	2	0.0021	1.4
NWTGPPEPIEAAVAR	137	151	L	F	0.966		1606.8	2	-0.011	-7
NWTGPPEPIEAAVARF	137	152	L	F	0.994		1753.88	2	0.0056	3.2
NWTGPPEPIEAAVARF	137	152	L	F	0.997		1753.88	2	-2.2e-05	-0.013
NWTGPPEPIEAAVARF	137	152	L	F	0.997		1753.88	3	0.004	2.3
NWTGPPEPIEAAVARFF	137	153	L	S	0.997		1900.95	2	0.0054	2.8
NWTGPPEPIEAAVARFF	137	153	L	S	0.997		1900.95	3	0.0028	1.5
WTGPPEPIEA	138	147	N	A	0.981		1095.52	2	-2.2e-05	-0.02
WTGPPEPIEAA	138	148	N	V	0.997		1166.56	2	0.00068	0.58
WTGPPEPIEAAVARF	138	152	N	F	0.997		1639.84	2	-0.00052	-0.32
TGPPEPIEAAVA	139	150	W	R	0.995		1150.59	1	0.00055	0.48
TGPPEPIEAAVA	139	150	W	R	0.997		1150.59	2	0.00048	0.42
TGPPEPIEAAVA	139	150	W	R	0.964		1150.59	2	0.0013	1.1
TGPPEPIEAAVA	139	150	W	R	0.974		1150.59	2	-0.00012	-0.11
TGPPEPIEAAVAR	139	151	W	F	0.997		1306.69	2	-0.0014	-1.1
TGPPEPIEAAVAR	139	151	W	F	0.997		1306.69	2	-2.2e-05	-0.017
TGPPEPIEAAVARF	139	152	W	F	0.997		1453.76	2	-0.00042	-0.29
TGPPEPIEAAVARF	139	152	W	F	0.997		1453.76	2	0.00058	0.4
TGPPEPIEAAVARF	139	152	W	F	0.997		1453.76	2	0.00018	0.12
TGPPEPIEAAVARF	139	152	W	F	0.997		1453.76	3	-9.8e-05	-0.067
TGPPEPIEAAVARF	139	152	W	F	0.997		1453.76	2	-2.2e-05	-0.015
TGPPEPIEAAVARF	139	152	W	F	0.997		1453.76	2	-0.00082	-0.57
TGPPEPIEAAVARF	139	152	W	F	0.997		1453.76	2	0.00038	0.26
TGPPEPIEAAVARF	139	152	W	F	0.997		1453.76	2	0.00018	0.12
TGPPEPIEAAVARF	139	152	W	F	0.997		1453.76	3	-9.8e-05	-0.067
TGPPEPIEAAVARFF	139	153	W	S	0.997		1600.83	2	0.00098	0.61
TGPPEPIEAAVARFF	139	153	W	S	0.997		1600.83	3	0.0008	0.5
TGPPEPIEAAVARFF	139	153	W	S	0.997		1600.83	2	0.00098	0.61
TGPPEPIEAAVARFF	139	153	W	S	0.997		1600.82	3	-0.0004	-0.25
TGPPEPIEAAVARFF	139	153	W	S	0.997		1600.83	2	0.00018	0.11
TGPPEPIEAAVARFF	139	153	W	S	0.997		1600.83	3	0.0005	0.31
GPPEPIEAAVARF	140	152	T	F	0.997		1352.71	2	0.00088	0.65
AVARFFSA	148	155	A	S	0.987		867.46	2	0.00028	0.32
AVARFFSA	148	155	A	S	0.99		867.46	2	-0.00012	-0.14
AVARFFSA	148	155	A	S	0.99		867.46	2	-0.00012	-0.14
AVARFFSASCVPGADKGQFPNLCRL	148	172	A	C	0.997	Carbamidomethyl (+57), Carbamidomethyl (+57)	2767.37	4	0.0009	0.32
VARFFSAS	149	156	A	C	0.99		883.45	2	-0.00062	-0.7
VARFFSASCVPGADKGQFPNLCRL	149	172	A	C	0.997	Carbamidomethyl (+57), Carbamidomethyl (+57)	2696.33	4	0.0012	0.44
RFFSASCVPGADKG	151	164	A	Q	0.997	Carbamidomethyl (+57)	1497.7	2	-0.0021	-1.4
RFFSASCVPGADKG	151	164	A	Q	0.997	Carbamidomethyl (+57)	1497.7	3	-0.00056	-0.38
RFFSASCVPGADKG	151	164	A	Q	0.996	Carbamidomethyl (+57)	1497.7	2	0.0013	0.88
RFFSASCVPGADKG	151	164	A	Q	0.997	Carbamidomethyl (+57)	1497.71	3	0.0018	1.2
RFFSASCVPGADKGQFPNL	151	169	A	C	0.995	Carbamidomethyl (+57)	2097.01	3	-0.0031	-1.5
RFFSASCVPGADKGQFPNLCRL	151	172	A	C	0.997	Carbamidomethyl (+57), Carbamidomethyl (+57)	2526.22	3	-0.0047	-1.9
RFFSASCVPGADKGQFPNLCRL	151	172	A	C	0.997	Carbamidomethyl (+57), Carbamidomethyl (+57)	2526.23	4	-0.0009	-0.36
RFFSASCVPGADKGQFPNLCRL	151	172	A	C	0.997	Carbamidomethyl (+57), Carbamidomethyl (+57)	2526.23	3	-0.00083	-0.33
RFFSASCVPGADKGQFPNLCRL	151	172	A	C	0.997	Carbamidomethyl (+57), Carbamidomethyl (+57)	2526.22	4	-0.0049	-1.9
RFFSASCVPGADKGQFPNLCRL	151	172	A	C	0.997	Carbamidomethyl (+57), Carbamidomethyl (+57)	2526.23	3	0.004	1.6
FFSASCVPGADK	152	163	R	G	0.967	Carbamidomethyl (+57)	1284.58	2	0.00071	0.55
FFSASCVPGADK	152	163	R	G	0.992	Carbamidomethyl (+57)	1284.58	2	0.0017	1.3
FFSASCVPGADK	152	163	R	G	0.993	Carbamidomethyl (+57)	1284.58	2	0.0025	2
FFSASCVPGADK	152	163	R	G	0.995	Carbamidomethyl (+57)	1284.59	2	0.0043	3.4
FFSASCVPGADK	152	163	R	G	0.997	Carbamidomethyl (+57)	1284.58	2	0.00011	0.088
FFSASCVPGADK	152	163	R	G	0.997	Carbamidomethyl (+57)	1284.58	2	0.00031	0.24
FFSASCVPGADK	152	163	R	G	0.997	Carbamidomethyl (+57)	1284.58	2	0.0017	1.3
FFSASCVPGADK	152	163	R	G	0.997	Carbamidomethyl (+57)	1284.58	2	0.00051	0.4
FFSASCVPGADK	152	163	R	G	0.989	Carbamidomethyl (+57)	1284.58	2	-0.0027	-2.1
FFSASCVPGADK	152	163	R	G	0.99	Carbamidomethyl (+57)	1284.58	2	0.0011	0.87
FFSASCVPGADK	152	163	R	G	0.997	Carbamidomethyl (+57)	1284.58	2	0.0023	1.8
FFSASCVPGADK	152	163	R	G	0.997	Carbamidomethyl (+57)	1284.58	2	0.00071	0.55
FFSASCVPGADK	152	163	R	G	0.989	Carbamidomethyl (+57)	1284.58	2	0.0015	1.2
FFSASCVPGADK	152	163	R	G	0.995	Carbamidomethyl (+57)	1284.58	2	-0.0039	-3
FFSASCVPGADK	152	163	R	G	0.996	Carbamidomethyl (+57)	1284.58	2	0.00051	0.4
FFSASCVPGADK	152	163	R	G	0.997	Carbamidomethyl (+57)	1284.58	2	-0.0027	-2.1
FFSASCVPGADK	152	163	R	G	0.997	Carbamidomethyl (+57)	1284.58	2	0.00011	0.088
FFSASCVPGADK	152	163	R	G	0.997	Carbamidomethyl (+57)	1284.58	2	-0.0033	-2.6
FFSASCVPGADK	152	163	R	G	0.997	Carbamidomethyl (+57)	1284.58	2	0.00031	0.24
FFSASCVPGADK	152	163	R	G	0.997	Carbamidomethyl (+57)	1284.58	2	0.00031	0.24
FFSASCVPGADK	152	163	R	G	0.994	Carbamidomethyl (+57)	1284.58	2	0.0011	0.87
FFSASCVPGADK	152	163	R	G	0.997	Carbamidomethyl (+57)	1284.58	2	0.0011	0.87
FFSASCVPGADKGQFPNL	152	169	R	C	0.978	Carbamidomethyl (+57)	1940.91	2	0.004	2.1
FFSASCVPGADKGQFPNLCR	152	171	R	L	0.982	Carbamidomethyl (+57), Carbamidomethyl (+57)	2257.04	3	-0.0044	-2
FFSASCVPGADKGQFPNLCR	152	171	R	L	0.992	Carbamidomethyl (+57), Carbamidomethyl (+57)	2257.04	3	0.0028	1.2
FFSASCVPGADKGQFPNLCR	152	171	R	L	0.997	Carbamidomethyl (+57), Carbamidomethyl (+57)	2257.04	3	-0.00083	-0.37
FFSASCVPGADKGQFPNLCR	152	171	R	L	0.997	Carbamidomethyl (+57), Carbamidomethyl (+57)	2257.04	3	0.00067	0.3
FFSASCVPGADKGQFPNLCR	152	171	R	L	0.997	Carbamidomethyl (+57), Carbamidomethyl (+57)	2257.04	3	0.0037	1.6
FFSASCVPGADKGQFPNLCR	152	171	R	L	0.997	Carbamidomethyl (+57), Carbamidomethyl (+57)	2257.05	3	0.013	5.7
FFSASCVPGADKGQFPNLCR	152	171	R	L	0.997	Carbamidomethyl (+57), Carbamidomethyl (+57)	2257.04	2	0.0024	1.1
FFSASCVPGADKGQFPNLCR	152	171	R	L	0.997	Carbamidomethyl (+57), Carbamidomethyl (+57)	2257.04	2	-0.0036	-1.6
FFSASCVPGADKGQFPNLCR	152	171	R	L	0.997	Carbamidomethyl (+57), Carbamidomethyl (+57)	2257.04	3	-0.0059	-2.6
FFSASCVPGADKGQFPNLCR	152	171	R	L	0.997	Carbamidomethyl (+57), Carbamidomethyl (+57)	2257.04	3	-0.002	-0.9
FFSASCVPGADKGQFPNLCR	152	171	R	L	0.997	Carbamidomethyl (+57), Carbamidomethyl (+57)	2257.05	4	0.0055	2.4
FFSASCVPGADKGQFPNLCR	152	171	R	L	0.997	Carbamidomethyl (+57), Carbamidomethyl (+57)	2257.04	3	-0.0035	-1.6
FFSASCVPGADKGQFPNLCR	152	171	R	L	0.997	Carbamidomethyl (+57), Carbamidomethyl (+57)	2257.04	3	-0.002	-0.9
FFSASCVPGADKGQFPNLCR	152	171	R	L	0.997	Carbamidomethyl (+57), Carbamidomethyl (+57)	2257.04	2	-0.0016	-0.69
FFSASCVPGADKGQFPNLCR	152	171	R	L	0.997	Carbamidomethyl (+57), Carbamidomethyl (+57)	2257.04	3	-0.0011	-0.5
FFSASCVPGADKGQFPNLCR	152	171	R	L	0.997	Carbamidomethyl (+57), Carbamidomethyl (+57)	2257.04	2	0.0024	1.1
FFSASCVPGADKGQFPNLCR	152	171	R	L	0.997	Carbamidomethyl (+57), Carbamidomethyl (+57)	2257.04	2	0.0024	1.1
FFSASCVPGADKGQFPNLCR	152	171	R	L	0.997	Carbamidomethyl (+57), Carbamidomethyl (+57)	2257.03	3	-0.0074	-3.3
FFSASCVPGADKGQFPNLCR	152	171	R	L	0.997	Carbamidomethyl (+57), Carbamidomethyl (+57)	2257.04	3	-0.0017	-0.77
FFSASCVPGADKGQFPNLCR	152	171	R	L	0.997	Carbamidomethyl (+57), Carbamidomethyl (+57)	2257.04	3	0.0019	0.83
FFSASCVPGADKGQFPNLCR	152	171	R	L	0.997	Carbamidomethyl (+57), Carbamidomethyl (+57)	2257.04	3	0.004	1.8
FFSASCVPGADKGQFPNLCR	152	171	R	L	0.997	Carbamidomethyl (+57), Carbamidomethyl (+57)	2257.04	3	0.0016	0.7
FFSASCVPGADKGQFPNLCR	152	171	R	L	0.997	Carbamidomethyl (+57), Carbamidomethyl (+57)	2257.03	3	-0.008	-3.6
FFSASCVPGADKGQFPNLCR	152	171	R	L	0.997	Carbamidomethyl (+57), Carbamidomethyl (+57)	2257.04	3	0.00037	0.16
FFSASCVPGADKGQFPNLCR	152	171	R	L	0.997	Carbamidomethyl (+57), Carbamidomethyl (+57)	2257.04	3	-0.00083	-0.37
FFSASCVPGADKGQFPNLCR	152	171	R	L	0.997	Carbamidomethyl (+57), Carbamidomethyl (+57)	2257.04	3	7.1e-05	0.032
FFSASCVPGADKGQFPNLCR	152	171	R	L	0.997	Carbamidomethyl (+57), Carbamidomethyl (+57)	2257.04	4	-0.0013	-0.58
FFSASCVPGADKGQFPNLCR	152	171	R	L	0.997	Carbamidomethyl (+57), Carbamidomethyl (+57)	2257.04	3	-0.00083	-0.37
FFSASCVPGADKGQFPNLCR	152	171	R	L	0.997	Carbamidomethyl (+57), Carbamidomethyl (+57)	2257.04	3	-0.0032	-1.4
FFSASCVPGADKGQFPNLCR	152	171	R	L	0.997	Carbamidomethyl (+57), Carbamidomethyl (+57)	2257.04	3	-0.0026	-1.2
FFSASCVPGADKGQFPNLCR	152	171	R	L	0.997	Carbamidomethyl (+57), Carbamidomethyl (+57)	2257.04	3	0.0016	0.7
FFSASCVPGADKGQFPNLCR	152	171	R	L	0.997	Carbamidomethyl (+57), Carbamidomethyl (+57)	2257.04	2	-0.0036	-1.6
FFSASCVPGADKGQFPNLCR	152	171	R	L	0.997	Carbamidomethyl (+57), Carbamidomethyl (+57)	2257.04	3	-0.0026	-1.2
FFSASCVPGADKGQFPNLCR	152	171	R	L	0.997	Carbamidomethyl (+57), Carbamidomethyl (+57)	2257.04	3	0.0037	1.6
FFSASCVPGADKGQFPNLCR	152	171	R	L	0.997	Carbamidomethyl (+57), Carbamidomethyl (+57)	2257.04	3	-0.0044	-2
FFSASCVPGADKGQFPNLCR	152	171	R	L	0.997	Carbamidomethyl (+57), Carbamidomethyl (+57)	2257.04	3	0.0019	0.83
FFSASCVPGADKGQFPNLCRL	152	172	R	C	0.997	Carbamidomethyl (+57), Carbamidomethyl (+57)	2370.13	3	7.1e-05	0.03
FFSASCVPGADKGQFPNLCRL	152	172	R	C	0.997	Carbamidomethyl (+57), Carbamidomethyl (+57)	2370.12	3	-0.00023	-0.096
FSASCVPGADKGQF	153	166	F	P	0.982	Carbamidomethyl (+57)	1469.66	2	0.0016	1.1
FSASCVPGADKGQFPN	153	168	F	L	0.997	Carbamidomethyl (+57)	1680.75	2	-0.0023	-1.4
FSASCVPGADKGQFPNL	153	169	F	C	0.997	Carbamidomethyl (+57)	1793.84	2	0.00041	0.23
FSASCVPGADKGQFPNLC	153	170	F	R	0.981	Carbamidomethyl (+57), Carbamidomethyl (+57)	1953.87	2	-0.0055	-2.8
FSASCVPGADKGQFPNLC	153	170	F	R	0.992	Carbamidomethyl (+57), Carbamidomethyl (+57)	1953.87	3	-0.0029	-1.5
FSASCVPGADKGQFPNLC	153	170	F	R	0.997	Carbamidomethyl (+57), Carbamidomethyl (+57)	1953.87	2	-0.00025	-0.13
FSASCVPGADKGQFPNLC	153	170	F	R	0.997	Carbamidomethyl (+57), Carbamidomethyl (+57)	1953.87	2	-0.0011	-0.54
FSASCVPGADKGQFPNLC	153	170	F	R	0.997	Carbamidomethyl (+57), Carbamidomethyl (+57)	1953.87	3	7.1e-05	0.037
FSASCVPGADKGQFPNLC	153	170	F	R	0.997	Carbamidomethyl (+57), Carbamidomethyl (+57)	1953.87	2	0.0033	1.7
FSASCVPGADKGQFPNLC	153	170	F	R	0.997	Carbamidomethyl (+57), Carbamidomethyl (+57)	1953.87	2	0.0015	0.79
FSASCVPGADKGQFPNLCR	153	171	F	L	0.997	Carbamidomethyl (+57), Carbamidomethyl (+57)	2109.97	3	-0.0023	-1.1
FSASCVPGADKGQFPNLCR	153	171	F	L	0.997	Carbamidomethyl (+57), Carbamidomethyl (+57)	2109.97	3	-0.002	-0.96
FSASCVPGADKGQFPNLCRL	153	172	F	C	0.977	Carbamidomethyl (+57), Deamidated (+1), Carbamidomethyl (+57)	2224.06	3	0.021	9.3
FSASCVPGADKGQFPNLCRL	153	172	F	C	0.995	Carbamidomethyl (+57), Deamidated (+1), Carbamidomethyl (+57)	2224.05	3	0.0055	2.5
FSASCVPGADKGQFPNLCRL	153	172	F	C	0.997	Carbamidomethyl (+57), Carbamidomethyl (+57)	2223.06	2	0.0067	3
FSASCVPGADKGQFPNLCRL	153	172	F	C	0.997	Carbamidomethyl (+57), Carbamidomethyl (+57)	2223.06	3	-0.00053	-0.24
FSASCVPGADKGQFPNLCRL	153	172	F	C	0.997	Carbamidomethyl (+57), Carbamidomethyl (+57)	2223.06	3	0.00067	0.3
FSASCVPGADKGQFPNLCRL	153	172	F	C	0.997	Carbamidomethyl (+57), Deamidated (+1), Carbamidomethyl (+57)	2224.04	3	-0.0044	-2
FSASCVPGADKGQFPNLCRL	153	172	F	C	0.997	Carbamidomethyl (+57), Deamidated (+1), Carbamidomethyl (+57)	2224.04	3	0.0019	0.83
FSASCVPGADKGQFPNLCRL	153	172	F	C	0.997	Carbamidomethyl (+57), Carbamidomethyl (+57)	2223.05	3	-0.002	-0.91
FSASCVPGADKGQFPNLCRL	153	172	F	C	0.997	Carbamidomethyl (+57), Carbamidomethyl (+57)	2223.06	3	-0.0011	-0.51
SASCVPGADKG	154	164	F	Q	0.978	Carbamidomethyl (+57)	1047.47	2	0.0012	1.2
SASCVPGADKG	154	164	F	Q	0.997	Carbamidomethyl (+57)	1047.46	2	-0.0026	-2.5
SASCVPGADKG	154	164	F	Q	0.997	Carbamidomethyl (+57)	1047.47	2	1.3e-05	0.012
SASCVPGADKGQFPN	154	168	F	L	0.997	Carbamidomethyl (+57)	1533.69	2	-8.7e-05	-0.057
SASCVPGADKGQFPN	154	168	F	L	0.991	Carbamidomethyl (+57)	1533.69	2	0.0025	1.6
SASCVPGADKGQFPN	154	168	F	L	0.997	Carbamidomethyl (+57)	1533.69	2	-0.00049	-0.32
SASCVPGADKGQFPNL	154	169	F	C	0.997	Carbamidomethyl (+57)	1646.77	2	-0.0018	-1.1
SASCVPGADKGQFPNL	154	169	F	C	0.976	Carbamidomethyl (+57)	1646.77	2	-0.0026	-1.6
SASCVPGADKGQFPNL	154	169	F	C	0.997	Carbamidomethyl (+57)	1646.77	2	-0.00019	-0.11
SASCVPGADKGQFPNLC	154	170	F	R	0.997	Carbamidomethyl (+57), Carbamidomethyl (+57)	1806.8	2	-0.0023	-1.2
SASCVPGADKGQFPNLC	154	170	F	R	0.997	Carbamidomethyl (+57), Carbamidomethyl (+57)	1806.8	3	-0.00023	-0.13
SASCVPGADKGQFPNLC	154	170	F	R	0.997	Carbamidomethyl (+57), Carbamidomethyl (+57)	1806.8	2	-5.3e-05	-0.029
SASCVPGADKGQFPNLC	154	170	F	R	0.993	Carbamidomethyl (+57), Carbamidomethyl (+57)	1806.8	2	-0.00085	-0.47
SASCVPGADKGQFPNLC	154	170	F	R	0.957	Carbamidomethyl (+57), Carbamidomethyl (+57)	1806.8	2	-0.00045	-0.25
SASCVPGADKGQFPNLC	154	170	F	R	0.997	Carbamidomethyl (+57), Carbamidomethyl (+57)	1806.8	3	7.1e-05	0.039
SASCVPGADKGQFPNLC	154	170	F	R	0.997	Carbamidomethyl (+57), Carbamidomethyl (+57)	1806.8	2	-0.0021	-1.1
SASCVPGADKGQFPNLCR	154	171	F	L	0.997	Carbamidomethyl (+57), Carbamidomethyl (+57)	1962.91	3	0.0031	1.6
SASCVPGADKGQFPNLCR	154	171	F	L	0.997	Carbamidomethyl (+57), Carbamidomethyl (+57)	1962.9	3	0.00067	0.34
SASCVPGADKGQFPNLCR	154	171	F	L	0.997	Carbamidomethyl (+57), Carbamidomethyl (+57)	1962.9	3	7.1e-05	0.036
SASCVPGADKGQFPNLCRL	154	172	F	C	0.994	Carbamidomethyl (+57), Deamidated (+1), Carbamidomethyl (+57)	2076.98	3	0.007	3.3
SASCVPGADKGQFPNLCRL	154	172	F	C	0.997	Carbamidomethyl (+57), Carbamidomethyl (+57)	2075.99	3	0.00037	0.18
SASCVPGADKGQFPNLCRL	154	172	F	C	0.997	Carbamidomethyl (+57), Deamidated (+1), Carbamidomethyl (+57)	2076.97	3	0.00066	0.32
SASCVPGADKGQFPNLCRL	154	172	F	C	0.997	Carbamidomethyl (+57), Carbamidomethyl (+57)	2075.99	2	-0.00085	-0.41
SASCVPGADKGQFPNLCRL	154	172	F	C	0.997	Carbamidomethyl (+57), Carbamidomethyl (+57)	2075.99	3	-0.00083	-0.4
SASCVPGADKGQFPNLCRL	154	172	F	C	0.975	Carbamidomethyl (+57), Deamidated (+1), Carbamidomethyl (+57)	2076.99	2	0.017	8.2
SASCVPGADKGQFPNLCRL	154	172	F	C	0.997	Carbamidomethyl (+57), Carbamidomethyl (+57)	2075.99	2	-0.0029	-1.4
SASCVPGADKGQFPNLCRL	154	172	F	C	0.997	Carbamidomethyl (+57), Carbamidomethyl (+57)	2075.99	3	-0.00053	-0.25
SASCVPGADKGQFPNLCRL	154	172	F	C	0.991	Carbamidomethyl (+57), Deamidated (+1), Carbamidomethyl (+57)	2076.97	2	-0.0049	-2.3
SASCVPGADKGQFPNLCRL	154	172	F	C	0.997	Carbamidomethyl (+57), Deamidated (+1), Carbamidomethyl (+57)	2076.97	2	-0.0029	-1.4
SASCVPGADKGQFPNLCRL	154	172	F	C	0.997	Carbamidomethyl (+57), Carbamidomethyl (+57)	2075.99	2	0.0011	0.55
SASCVPGADKGQFPNLCRL	154	172	F	C	0.997	Carbamidomethyl (+57), Carbamidomethyl (+57)	2075.99	3	7.1e-05	0.034
SASCVPGADKGQFPNLCRL	154	172	F	C	0.997	Carbamidomethyl (+57), Deamidated (+1), Carbamidomethyl (+57)	2076.97	3	0.00036	0.17
SASCVPGADKGQFPNLCRL	154	172	F	C	0.997	Carbamidomethyl (+57), Deamidated (+1), Carbamidomethyl (+57)	2076.97	3	-0.00024	-0.12
SASCVPGADKGQFPNLCRL	154	172	F	C	0.997	Carbamidomethyl (+57), Carbamidomethyl (+57)	2075.99	2	-0.00085	-0.41
SASCVPGADKGQFPNLCRL	154	172	F	C	0.997	Carbamidomethyl (+57), Carbamidomethyl (+57)	2075.99	2	-0.00085	-0.41
SASCVPGADKGQFPNLCRL	154	172	F	C	0.997	Carbamidomethyl (+57), Carbamidomethyl (+57)	2075.99	3	-0.00083	-0.4
SASCVPGADKGQFPNLCRLC	154	173	F	A	0.997	Carbamidomethyl (+57), Carbamidomethyl (+57), Carbamidomethyl (+57)	2236.02	3	0.0014	0.63
SASCVPGADKGQFPNLCRLCAGTGENKCAF	154	183	F	S	0.987	Carbamidomethyl (+57), Carbamidomethyl (+57), Carbamidomethyl (+57), Carbamidomethyl (+57)	3271.46	4	-0.0025	-0.77
ASCVPGADKG	155	164	S	Q	0.997	Carbamidomethyl (+57)	960.43	2	-0.00059	-0.61
ASCVPGADKG	155	164	S	Q	0.997	Carbamidomethyl (+57)	960.43	2	-0.00039	-0.4
ASCVPGADKGQFPNLCRL	155	172	S	C	0.996	Carbamidomethyl (+57), Carbamidomethyl (+57)	1988.95	3	-0.003	-1.5
ASCVPGADKGQFPNLCRL	155	172	S	C	0.997	Carbamidomethyl (+57), Carbamidomethyl (+57)	1988.95	3	-0.0048	-2.4
SCVPGADKG	156	164	A	Q	0.993	Carbamidomethyl (+57)	889.4	2	-0.00029	-0.32
SCVPGADKG	156	164	A	Q	0.996	Carbamidomethyl (+57)	889.4	2	-8.7e-05	-0.098
SCVPGADKGQFPNL	156	169	A	C	0.997	Carbamidomethyl (+57)	1488.7	2	0.00071	0.48
SCVPGADKGQFPNLC	156	170	A	R	0.997	Carbamidomethyl (+57), Carbamidomethyl (+57)	1648.73	2	-0.0014	-0.82
SCVPGADKGQFPNLC	156	170	A	R	0.978	Carbamidomethyl (+57), Carbamidomethyl (+57)	1648.73	2	-0.00095	-0.58
SCVPGADKGQFPNLC	156	170	A	R	0.997	Carbamidomethyl (+57), Carbamidomethyl (+57)	1648.73	2	0.00025	0.15
SCVPGADKGQFPNLC	156	170	A	R	0.974	Carbamidomethyl (+57), Carbamidomethyl (+57)	1648.74	2	0.0054	3.3
SCVPGADKGQFPNLCR	156	171	A	L	0.997	Carbamidomethyl (+57), Carbamidomethyl (+57)	1804.83	3	-0.00023	-0.13
SCVPGADKGQFPNLCRL	156	172	A	C	0.997	Carbamidomethyl (+57), Deamidated (+1), Carbamidomethyl (+57)	1918.9	3	5.5e-05	0.029
SCVPGADKGQFPNLCRL	156	172	A	C	0.997	Carbamidomethyl (+57), Carbamidomethyl (+57)	1917.92	2	-0.0012	-0.6
SCVPGADKGQFPNLCRL	156	172	A	C	0.997	Carbamidomethyl (+57), Carbamidomethyl (+57)	1917.92	3	0.0016	0.82
SCVPGADKGQFPNLCRL	156	172	A	C	0.997	Carbamidomethyl (+57), Carbamidomethyl (+57)	1917.92	3	-0.002	-1.1
SCVPGADKGQFPNLCRL	156	172	A	C	0.98	Carbamidomethyl (+57), Carbamidomethyl (+57)	1917.9	3	-0.017	-8.7
SCVPGADKGQFPNLCRL	156	172	A	C	0.997	Carbamidomethyl (+57), Carbamidomethyl (+57)	1917.92	3	0.0031	1.6
SCVPGADKGQFPNLCRL	156	172	A	C	0.997	Carbamidomethyl (+57), Carbamidomethyl (+57)	1917.92	3	0.0016	0.82
SCVPGADKGQFPNLCRL	156	172	A	C	0.997	Carbamidomethyl (+57), Carbamidomethyl (+57)	1917.92	3	0.00067	0.35
SCVPGADKGQFPNLCRL	156	172	A	C	0.997	Carbamidomethyl (+57), Deamidated (+1), Carbamidomethyl (+57)	1918.9	3	-0.002	-1.1
SCVPGADKGQFPNLCRL	156	172	A	C	0.997	Carbamidomethyl (+57), Carbamidomethyl (+57)	1917.92	3	0.00067	0.35
SCVPGADKGQFPNLCRL	156	172	A	C	0.997	Carbamidomethyl (+57), Carbamidomethyl (+57)	1917.92	3	0.00067	0.35
SCVPGADKGQFPNLCRL	156	172	A	C	0.997	Carbamidomethyl (+57), Carbamidomethyl (+57)	1917.92	2	-0.00055	-0.29
CVPGADKG	157	164	S	Q	0.989	Carbamidomethyl (+57)	802.36	2	0.00031	0.39
CVPGADKG	157	164	S	Q	0.99	Carbamidomethyl (+57)	802.36	2	0.00011	0.14
CVPGADKGQFPNLC	157	170	S	R	0.988	Carbamidomethyl (+57), Carbamidomethyl (+57)	1561.7	2	0.00085	0.54
CVPGADKGQFPNLC	157	170	S	R	0.997	Carbamidomethyl (+57), Carbamidomethyl (+57)	1561.7	2	-0.004	-2.5
CVPGADKGQFPNLCRL	157	172	S	C	0.997	Carbamidomethyl (+57), Carbamidomethyl (+57)	1830.89	3	0.0018	0.97
CVPGADKGQFPNLCRL	157	172	S	C	0.997	Carbamidomethyl (+57), Carbamidomethyl (+57)	1830.89	3	-0.0015	-0.83
CVPGADKGQFPNLCRL	157	172	S	C	0.997	Carbamidomethyl (+57), Carbamidomethyl (+57)	1830.89	3	0.00027	0.15
CVPGADKGQFPNLCRL	157	172	S	C	0.997	Carbamidomethyl (+57), Carbamidomethyl (+57)	1830.89	3	0.0024	1.3
VPGADKGQFPNLCRL	158	172	C	C	0.997	Carbamidomethyl (+57)	1670.86	2	-0.00069	-0.41
PGADKGQFPNLCRL	159	172	V	C	0.997	Carbamidomethyl (+57)	1571.78	2	-0.0053	-3.4
PGADKGQFPNLCRL	159	172	V	C	0.997	Carbamidomethyl (+57)	1571.79	2	-0.00069	-0.44
PGADKGQFPNLCRL	159	172	V	C	0.997	Carbamidomethyl (+57)	1571.79	2	-0.00029	-0.18
PGADKGQFPNLCRL	159	172	V	C	0.997	Carbamidomethyl (+57)	1571.78	2	-0.0065	-4.1
PGADKGQFPNLCRLCA	159	174	V	G	0.979	Carbamidomethyl (+57), Carbamidomethyl (+57)	1802.84	2	-0.015	-8.3
ADKGQFPNLCRL	161	172	G	C	0.997	Carbamidomethyl (+57)	1417.71	3	-0.00046	-0.33
ADKGQFPNLCRL	161	172	G	C	0.997	Carbamidomethyl (+57)	1417.71	3	-0.0014	-0.96
KGQFPNLCRL	163	172	D	C	0.995	Carbamidomethyl (+57)	1231.65	3	0.00064	0.52
KGQFPNLCRL	163	172	D	C	0.997	Carbamidomethyl (+57)	1231.65	3	-0.00086	-0.7
GQFPNLCR	164	171	K	L	0.97	Deamidated (+1), Carbamidomethyl (+57)	991.46	2	0.0016	1.6
GQFPNLCR	164	171	K	L	0.977	Deamidated (+1), Carbamidomethyl (+57)	991.46	2	0.0014	1.4
GQFPNLCR	164	171	K	L	0.99	Deamidated (+1), Carbamidomethyl (+57)	991.46	2	0.0006	0.6
GQFPNLCR	164	171	K	L	0.99	Carbamidomethyl (+57)	990.47	2	1.3e-05	0.013
GQFPNLCR	164	171	K	L	0.99	Carbamidomethyl (+57)	990.47	2	-0.00039	-0.39
GQFPNLCR	164	171	K	L	0.959	Deamidated (+1), Carbamidomethyl (+57)	991.46	2	0.0022	2.2
GQFPNLCR	164	171	K	L	0.99	Deamidated (+1), Carbamidomethyl (+57)	991.46	2	0.0012	1.2
GQFPNLCR	164	171	K	L	0.99	Carbamidomethyl (+57)	990.47	2	1.3e-05	0.013
GQFPNLCR	164	171	K	L	0.99	Carbamidomethyl (+57)	990.47	2	1.3e-05	0.013
GQFPNLCRL	164	172	K	C	0.952	Carbamidomethyl (+57)	1103.55	2	-0.00029	-0.26
QFPNLCRL	165	172	G	C	0.977	Carbamidomethyl (+57)	1046.53	2	0.00061	0.58
QFPNLCRL	165	172	G	C	0.987	Carbamidomethyl (+57)	1046.53	2	-0.00019	-0.18
QFPNLCRL	165	172	G	C	0.989	Carbamidomethyl (+57)	1046.53	2	0.00021	0.2
QFPNLCRL	165	172	G	C	0.952	Carbamidomethyl (+57)	1046.53	2	0.0014	1.3
QFPNLCRL	165	172	G	C	0.961	Carbamidomethyl (+57)	1046.53	2	-0.00039	-0.37
QFPNLCRL	165	172	G	C	0.963	Carbamidomethyl (+57)	1046.53	2	-0.0012	-1.1
QFPNLCRL	165	172	G	C	0.983	Carbamidomethyl (+57)	1046.53	2	0.00021	0.2
QFPNLCRL	165	172	G	C	0.99	Carbamidomethyl (+57)	1046.53	2	0.00021	0.2
QFPNLCRL	165	172	G	C	0.99	Carbamidomethyl (+57)	1046.53	2	1.3e-05	0.012
RLCAGTGENKCA	171	182	C	F	0.997	Carbamidomethyl (+57), Carbamidomethyl (+57)	1335.6	2	-0.0033	-2.4
RLCAGTGENKCA	171	182	C	F	0.997	Carbamidomethyl (+57), Carbamidomethyl (+57)	1335.6	3	-2.9e-05	-0.021
RLCAGTGENKCA	171	182	C	F	0.997	Carbamidomethyl (+57), Carbamidomethyl (+57)	1335.6	2	-0.00025	-0.19
RLCAGTGENKCA	171	182	C	F	0.997	Carbamidomethyl (+57), Carbamidomethyl (+57)	1335.6	3	-2.9e-05	-0.021
RLCAGTGENKCAF	171	183	C	S	0.997	Carbamidomethyl (+57), Carbamidomethyl (+57)	1482.67	2	0.00075	0.5
RLCAGTGENKCAF	171	183	C	S	0.997	Carbamidomethyl (+57), Carbamidomethyl (+57)	1482.67	3	-0.00093	-0.63
RLCAGTGENKCAF	171	183	C	S	0.997	Carbamidomethyl (+57), Carbamidomethyl (+57)	1482.67	2	-0.00045	-0.31
RLCAGTGENKCAF	171	183	C	S	0.997	Carbamidomethyl (+57), Carbamidomethyl (+57)	1482.67	3	-0.0015	-1
LCAGTGENK	172	180	R	C	0.959	Carbamidomethyl (+57)	948.43	2	-0.0024	-2.5
LCAGTGENK	172	180	R	C	0.974	Carbamidomethyl (+57), Deamidated (+1)	949.42	2	0.0006	0.63
LCAGTGENK	172	180	R	C	0.985	Carbamidomethyl (+57)	948.43	2	-0.00059	-0.62
LCAGTGENKCA	172	182	R	F	0.997	Carbamidomethyl (+57), Carbamidomethyl (+57)	1179.5	2	-0.00035	-0.3
LCAGTGENKCAF	172	183	R	S	0.997	Carbamidomethyl (+57), Carbamidomethyl (+57)	1326.57	2	0.001	0.79
LCAGTGENKCAFSSQEPYFSYSGAFK	172	197	R	C	0.987	Carbamidomethyl (+57), Carbamidomethyl (+57)	2905.28	3	0.0063	2.2
LCAGTGENKCAFSSQEPYFSYSGAFK	172	197	R	C	0.997	Carbamidomethyl (+57), Carbamidomethyl (+57)	2905.27	3	0.0024	0.82
LCAGTGENKCAFSSQEPYFSYSGAFK	172	197	R	C	0.997	Carbamidomethyl (+57), Carbamidomethyl (+57)	2905.26	3	-0.0069	-2.4
LCAGTGENKCAFSSQEPYFSYSGAFK	172	197	R	C	0.997	Carbamidomethyl (+57), Carbamidomethyl (+57)	2905.27	3	-0.0012	-0.42
LCAGTGENKCAFSSQEPYFSYSGAFK	172	197	R	C	0.997	Carbamidomethyl (+57), Carbamidomethyl (+57)	2905.26	3	-0.0069	-2.4
LCAGTGENKCAFSSQEPYFSYSGAFK	172	197	R	C	0.977	Carbamidomethyl (+57), Carbamidomethyl (+57)	2905.27	3	-0.0012	-0.42
LCAGTGENKCAFSSQEPYFSYSGAFK	172	197	R	C	0.947	Carbamidomethyl (+57), Carbamidomethyl (+57)	2905.27	3	0.006	2.1
LCAGTGENKCAFSSQEPYFSYSGAFK	172	197	R	C	0.978	Carbamidomethyl (+57), Deamidated (+1), Carbamidomethyl (+57)	2906.26	3	0.0066	2.3
LCAGTGENKCAFSSQEPYFSYSGAFK	172	197	R	C	0.997	Carbamidomethyl (+57), Deamidated (+1), Carbamidomethyl (+57), Deamidated (+1)	2907.24	3	0.0068	2.4
LCAGTGENKCAFSSQEPYFSYSGAFK	172	197	R	C	0.997	Carbamidomethyl (+57), Deamidated (+1), Carbamidomethyl (+57)	2906.27	3	0.017	5.8
LCAGTGENKCAFSSQEPYFSYSGAFK	172	197	R	C	0.997	Carbamidomethyl (+57), Deamidated (+1), Carbamidomethyl (+57)	2906.25	3	-0.0021	-0.74
CAGTGENKCA	173	182	L	F	0.997	Carbamidomethyl (+57), Carbamidomethyl (+57)	1066.42	2	-0.00025	-0.24
CAGTGENKCA	173	182	L	F	0.997	Carbamidomethyl (+57), Carbamidomethyl (+57)	1066.42	2	-0.00025	-0.24
CAGTGENKCAF	173	183	L	S	0.997	Carbamidomethyl (+57), Carbamidomethyl (+57)	1213.49	2	-0.00045	-0.37
CAGTGENKCAF	173	183	L	S	0.97	Carbamidomethyl (+57), Carbamidomethyl (+57)	1213.49	2	0.00075	0.62
CAGTGENKCAF	173	183	L	S	0.99	Carbamidomethyl (+57), Carbamidomethyl (+57)	1213.48	2	-0.0015	-1.2
CAGTGENKCAF	173	183	L	S	0.997	Carbamidomethyl (+57), Deamidated (+1), Carbamidomethyl (+57)	1214.47	2	-0.0013	-1
CAGTGENKCAF	173	183	L	S	0.997	Carbamidomethyl (+57), Carbamidomethyl (+57)	1213.49	2	-5.3e-05	-0.043
CAGTGENKCAF	173	183	L	S	0.997	Carbamidomethyl (+57), Carbamidomethyl (+57)	1213.49	2	-5.3e-05	-0.043
CAGTGENKCAF	173	183	L	S	0.997	Carbamidomethyl (+57), Deamidated (+1), Carbamidomethyl (+57)	1214.47	2	0.00053	0.44
CAGTGENKCAF	173	183	L	S	0.997	Carbamidomethyl (+57), Carbamidomethyl (+57)	1213.49	2	0.00015	0.12
CAGTGENKCAF	173	183	L	S	0.949	Carbamidomethyl (+57), Carbamidomethyl (+57)	1213.49	2	0.00015	0.12
CAGTGENKCAF	173	183	L	S	0.997	Carbamidomethyl (+57), Carbamidomethyl (+57)	1213.48	2	-0.00085	-0.7
CAGTGENKCAF	173	183	L	S	0.997	Carbamidomethyl (+57), Deamidated (+1), Carbamidomethyl (+57)	1214.47	2	-0.00067	-0.55
CAGTGENKCAF	173	183	L	S	0.997	Carbamidomethyl (+57), Deamidated (+1), Carbamidomethyl (+57)	1214.47	2	0.00013	0.11
CAGTGENKCAF	173	183	L	S	0.997	Carbamidomethyl (+57), Carbamidomethyl (+57)	1213.49	2	-5.3e-05	-0.043
CAGTGENKCAFS	173	184	L	S	0.997	Carbamidomethyl (+57), Carbamidomethyl (+57)	1300.52	2	0.00035	0.27
CAGTGENKCAFS	173	184	L	S	0.993	Carbamidomethyl (+57), Carbamidomethyl (+57)	1300.52	2	-0.00085	-0.66
CAGTGENKCAFSS	173	185	L	Q	0.997	Carbamidomethyl (+57), Carbamidomethyl (+57)	1387.55	2	-0.00045	-0.33
CAGTGENKCAFSSQEPY	173	189	L	F	0.997	Carbamidomethyl (+57), Carbamidomethyl (+57), Deamidated (+1)	1905.77	2	0.017	8.8
CAGTGENKCAFSSQEPYFS	173	191	L	Y	0.997	Carbamidomethyl (+57), Carbamidomethyl (+57)	2138.87	2	0.002	0.96
CAGTGENKCAFSSQEPYFS	173	191	L	Y	0.997	Carbamidomethyl (+57), Carbamidomethyl (+57)	2138.87	2	4.7e-05	0.022
CAGTGENKCAFSSQEPYFSYSGA	173	195	L	F	0.997	Carbamidomethyl (+57), Carbamidomethyl (+57)	2517.02	2	0.0021	0.85
CAGTGENKCAFSSQEPYFSYSGAFKCLRDGAGDV	173	206	L	A	0.995	Carbamidomethyl (+57), Carbamidomethyl (+57), Deamidated (+1), Carbamidomethyl (+57)	3736.6	4	0.012	3.2
CAGTGENKCAFSSQEPYFSYSGAFKCLRDGAGDV	173	206	L	A	0.995	Carbamidomethyl (+57), Carbamidomethyl (+57), Carbamidomethyl (+57)	3735.61	4	0.0082	2.2
CAGTGENKCAFSSQEPYFSYSGAFKCLRDGAGDVA	173	207	L	F	0.997	Carbamidomethyl (+57), Carbamidomethyl (+57), Carbamidomethyl (+57)	3806.64	4	0.0047	1.2
CAGTGENKCAFSSQEPYFSYSGAFKCLRDGAGDVA	173	207	L	F	0.997	Carbamidomethyl (+57), Carbamidomethyl (+57), Carbamidomethyl (+57)	3806.64	4	0.0011	0.3
CAGTGENKCAFSSQEPYFSYSGAFKCLRDGAGDVA	173	207	L	F	0.997	Carbamidomethyl (+57), Carbamidomethyl (+57), Carbamidomethyl (+57)	3806.65	4	0.0051	1.3
AGTGENKCAF	174	183	C	S	0.997	Carbamidomethyl (+57)	1053.45	2	-0.00039	-0.37
AGTGENKCAF	174	183	C	S	0.997	Carbamidomethyl (+57)	1053.45	2	-0.00019	-0.18
GTGENKCAF	175	183	A	S	0.976	Carbamidomethyl (+57)	982.42	2	-0.00049	-0.5
GTGENKCAFSSQ	175	186	A	E	0.97	Carbamidomethyl (+57), Phospho (+80), Deamidated (+1)	1365.48	2	-0.0088	-6.5
CAFSSQEPYFSYSGAFK	181	197	K	C	0.992	Carbamidomethyl (+57)	1974.84	3	-0.0015	-0.74
CAFSSQEPYFSYSGAFK	181	197	K	C	0.997	Carbamidomethyl (+57), Deamidated (+1)	1975.84	2	0.0097	4.9
CAFSSQEPYFSYSGAFK	181	197	K	C	0.997	Carbamidomethyl (+57)	1974.85	2	0.0019	0.97
CAFSSQEPYFSYSGAFK	181	197	K	C	0.997	Carbamidomethyl (+57)	1974.85	2	0.0057	2.9
CAFSSQEPYFSYSGAFK	181	197	K	C	0.997	Carbamidomethyl (+57)	1974.85	3	0.0054	2.8
CAFSSQEPYFSYSGAFK	181	197	K	C	0.997	Carbamidomethyl (+57)	1974.85	2	0.00091	0.46
CAFSSQEPYFSYSGAFK	181	197	K	C	0.997	Carbamidomethyl (+57)	1974.85	2	0.00031	0.16
CAFSSQEPYFSYSGAFK	181	197	K	C	0.997	Carbamidomethyl (+57)	1974.84	2	-0.0011	-0.55
CAFSSQEPYFSYSGAFK	181	197	K	C	0.997	Carbamidomethyl (+57)	1974.84	3	-0.0015	-0.74
CAFSSQEPYFSYSGAFK	181	197	K	C	0.997	Carbamidomethyl (+57)	1974.84	2	-0.0019	-0.96
CAFSSQEPYFSYSGAFK	181	197	K	C	0.997	Carbamidomethyl (+57)	1974.84	2	-0.00089	-0.45
CAFSSQEPYFSYSGAFK	181	197	K	C	0.997	Carbamidomethyl (+57), Deamidated (+1)	1975.84	2	0.014	7
CAFSSQEPYFSYSGAFK	181	197	K	C	0.997	Carbamidomethyl (+57)	1974.85	2	-0.00049	-0.25
CAFSSQEPYFSYSGAFK	181	197	K	C	0.997	Carbamidomethyl (+57)	1974.84	2	-0.0041	-2.1
CAFSSQEPYFSYSGAFK	181	197	K	C	0.997	Carbamidomethyl (+57)	1974.85	3	0.0021	1.1
CAFSSQEPYFSYSGAFK	181	197	K	C	0.997	Carbamidomethyl (+57)	1974.84	2	-0.0013	-0.65
CAFSSQEPYFSYSGAFK	181	197	K	C	0.996	Carbamidomethyl (+57)	1974.84	2	-0.0017	-0.85
CAFSSQEPYFSYSGAFK	181	197	K	C	0.997	Carbamidomethyl (+57)	1974.84	2	-0.0011	-0.55
CAFSSQEPYFSYSGAFK	181	197	K	C	0.997	Carbamidomethyl (+57)	1974.85	2	0.0029	1.5
CAFSSQEPYFSYSGAFK	181	197	K	C	0.997	Carbamidomethyl (+57), Deamidated (+1)	1975.83	2	0.0039	2
CAFSSQEPYFSYSGAFK	181	197	K	C	0.997	Carbamidomethyl (+57)	1974.84	2	-0.0035	-1.8
CAFSSQEPYFSYSGAFK	181	197	K	C	0.997	Carbamidomethyl (+57)	1974.85	2	0.0027	1.4
CAFSSQEPYFSYSGAFK	181	197	K	C	0.997	Carbamidomethyl (+57)	1974.85	3	0.00034	0.17
CAFSSQEPYFSYSGAFK	181	197	K	C	0.997	Carbamidomethyl (+57)	1974.84	3	-0.0045	-2.3
CAFSSQEPYFSYSGAFK	181	197	K	C	0.997	Carbamidomethyl (+57)	1974.85	2	0.00011	0.057
CAFSSQEPYFSYSGAFK	181	197	K	C	0.997	Carbamidomethyl (+57)	1974.85	2	-0.00029	-0.15
CAFSSQEPYFSYSGAFK	181	197	K	C	0.997	Carbamidomethyl (+57)	1974.85	2	0.00031	0.16
CAFSSQEPYFSYSGAFK	181	197	K	C	0.997	Carbamidomethyl (+57)	1974.84	2	-0.0023	-1.2
CAFSSQEPYFSYSGAFK	181	197	K	C	0.997	Carbamidomethyl (+57)	1974.84	2	-0.0023	-1.2
CAFSSQEPYFSYSGAFK	181	197	K	C	0.997	Carbamidomethyl (+57)	1974.85	2	0.00011	0.057
CAFSSQEPYFSYSGAFK	181	197	K	C	0.985	Carbamidomethyl (+57)	1974.85	2	0.00051	0.26
CAFSSQEPYFSYSGAFK	181	197	K	C	0.997	Carbamidomethyl (+57)	1974.85	2	0.0015	0.77
CAFSSQEPYFSYSGAFK	181	197	K	C	0.997	Carbamidomethyl (+57)	1974.85	3	0.0018	0.93
CAFSSQEPYFSYSGAFK	181	197	K	C	0.997	Carbamidomethyl (+57)	1974.85	2	0.0037	1.9
CAFSSQEPYFSYSGAFK	181	197	K	C	0.987	Carbamidomethyl (+57)	1974.85	2	-0.00029	-0.15
CAFSSQEPYFSYSGAFK	181	197	K	C	0.997	Carbamidomethyl (+57)	1974.84	2	-0.0033	-1.7
CAFSSQEPYFSYSGAFKCLR	181	200	K	D	0.997	Carbamidomethyl (+57), Deamidated (+1), Carbamidomethyl (+57)	2405.07	2	0.022	9.1
CAFSSQEPYFSYSGAFKCLR	181	200	K	D	0.997	Carbamidomethyl (+57), Carbamidomethyl (+57)	2404.06	2	-0.00015	-0.063
CAFSSQEPYFSYSGAFKCLR	181	200	K	D	0.997	Carbamidomethyl (+57), Carbamidomethyl (+57)	2404.06	3	0.0026	1.1
CAFSSQEPYFSYSGAFKCLR	181	200	K	D	0.997	Carbamidomethyl (+57), Carbamidomethyl (+57)	2404.06	3	0.00077	0.32
CAFSSQEPYFSYSGAFKCLR	181	200	K	D	0.997	Carbamidomethyl (+57), Carbamidomethyl (+57)	2404.06	3	0.0032	1.3
CAFSSQEPYFSYSGAFKCLR	181	200	K	D	0.997	Carbamidomethyl (+57), Carbamidomethyl (+57)	2404.06	3	0.002	0.82
CAFSSQEPYFSYSGAFKCLR	181	200	K	D	0.997	Carbamidomethyl (+57), Carbamidomethyl (+57)	2404.07	3	0.0035	1.4
CAFSSQEPYFSYSGAFKCLR	181	200	K	D	0.997	Carbamidomethyl (+57), Carbamidomethyl (+57)	2404.06	2	-0.00015	-0.063
CAFSSQEPYFSYSGAFKCLR	181	200	K	D	0.997	Carbamidomethyl (+57), Carbamidomethyl (+57)	2404.06	3	-0.0025	-1.1
CAFSSQEPYFSYSGAFKCLRDGAGDVAFIR	181	210	K	E	0.997	Carbamidomethyl (+57), Carbamidomethyl (+57)	3405.56	4	0.0093	2.7
CAFSSQEPYFSYSGAFKCLRDGAGDVAFIR	181	210	K	E	0.997	Carbamidomethyl (+57), Carbamidomethyl (+57)	3405.54	4	-0.012	-3.5
AFSSQEPYFS	182	191	C	Y	0.996		1161.5	2	-0.0019	-1.7
AFSSQEPYFS	182	191	C	Y	0.997		1161.5	2	0.00048	0.41
AFSSQEPYFS	182	191	C	Y	0.985		1161.5	2	0.0011	0.93
AFSSQEPYFSYSGA	182	195	C	F	0.972		1539.65	2	0.00098	0.63
FSSQEPYFS	183	191	A	Y	0.961		1090.46	2	0.00098	0.9
FSSQEPYFS	183	191	A	Y	0.965		1090.46	2	-0.00022	-0.2
FSSQEPYFS	183	191	A	Y	0.993		1090.46	2	0.00018	0.16
FSSQEPYFS	183	191	A	Y	0.948		1090.46	1	-0.0019	-1.8
FSSQEPYFS	183	191	A	Y	0.985		1090.46	2	0.0012	1.1
FSSQEPYFS	183	191	A	Y	0.991		1090.46	2	0.00098	0.9
FSSQEPYFSYSGA	183	195	A	F	0.997		1468.61	2	-0.00012	-0.083
FSSQEPYFSYSGA	183	195	A	F	0.993		1468.62	2	0.00088	0.6
FSSQEPYFSYSGAFK	183	197	A	C	0.997		1743.78	2	-0.0021	-1.2
FSSQEPYFSYSGAFKCL	183	199	A	R	0.99	Carbamidomethyl (+57)	2016.88	2	-0.0093	-4.6
FSSQEPYFSYSGAFKCLRDGAGDV	183	206	A	A	0.994	Carbamidomethyl (+57)	2687.2	3	0.0036	1.4
FSSQEPYFSYSGAFKCLRDGAGDV	183	206	A	A	0.997	Carbamidomethyl (+57)	2687.2	3	0.0036	1.4
FSSQEPYFSYSGAFKCLRDGAGDVA	183	207	A	F	0.973	Carbamidomethyl (+57)	2758.24	3	0.0017	0.63
FSSQEPYFSYSGAFKCLRDGAGDVA	183	207	A	F	0.997	Carbamidomethyl (+57)	2758.24	3	0.0041	1.5
FSSQEPYFSYSGAFKCLRDGAGDVA	183	207	A	F	0.997	Carbamidomethyl (+57)	2758.23	3	-0.0025	-0.89
FSSQEPYFSYSGAFKCLRDGAGDVA	183	207	A	F	0.994	Carbamidomethyl (+57)	2758.24	3	0.0059	2.2
SSQEPYFSY	184	192	F	S	0.996		1106.46	2	0.00088	0.79
SSQEPYFSY	184	192	F	S	0.988		1106.46	2	0.0037	3.3
SSQEPYFSY	184	192	F	S	0.995		1106.45	2	-0.0029	-2.6
SSQEPYFSYSGAF	184	196	F	K	0.997		1468.62	2	0.00048	0.33
SSQEPYFSYSGAF	184	196	F	K	0.985		1468.62	2	0.0011	0.73
SSQEPYFSYSGAFK	184	197	F	C	0.997		1596.71	2	0.0019	1.2
SQEPYFSYSGA	185	195	S	F	0.997		1234.51	2	0.00028	0.23
SQEPYFSYSGAFK	185	197	S	C	0.993		1509.68	2	0.0039	2.6
SQEPYFSYSGAFKCLRDGAGDV	185	206	S	A	0.96	Carbamidomethyl (+57)	2453.1	3	0.0014	0.59
SQEPYFSYSGAFKCLRDGAGDV	185	206	S	A	0.995	Carbamidomethyl (+57)	2453.09	3	-0.0028	-1.1
SQEPYFSYSGAFKCLRDGAGDV	185	206	S	A	0.975	Carbamidomethyl (+57)	2453.09	3	-0.0055	-2.2
SQEPYFSYSGAFKCLRDGAGDV	185	206	S	A	0.995	Carbamidomethyl (+57)	2453.11	3	0.0092	3.8
SQEPYFSYSGAFKCLRDGAGDV	185	206	S	A	0.997	Carbamidomethyl (+57)	2453.1	3	0.0041	1.7
SQEPYFSYSGAFKCLRDGAGDVA	185	207	S	F	0.997	Carbamidomethyl (+57)	2524.13	3	0.0016	0.65
SQEPYFSYSGAFKCLRDGAGDVA	185	207	S	F	0.997	Carbamidomethyl (+57)	2524.14	3	0.0043	1.7
SQEPYFSYSGAFKCLRDGAGDVA	185	207	S	F	0.97	Carbamidomethyl (+57)	2524.13	3	0.0016	0.65
SQEPYFSYSGAFKCLRDGAGDVA	185	207	S	F	0.997	Carbamidomethyl (+57)	2524.14	3	0.0043	1.7
YSGAFKCL	192	199	S	R	0.99	Carbamidomethyl (+57)	944.44	2	1.3e-05	0.013
YSGAFKCL	192	199	S	R	0.99	Carbamidomethyl (+57)	944.44	2	1.3e-05	0.013
YSGAFKCLR	192	200	S	D	0.997	Carbamidomethyl (+57)	1100.54	3	-0.00026	-0.24
YSGAFKCLR	192	200	S	D	0.997	Carbamidomethyl (+57)	1100.54	2	-0.0015	-1.4
YSGAFKCLR	192	200	S	D	0.997	Carbamidomethyl (+57)	1100.54	2	-0.0015	-1.4
YSGAFKCLRD	192	201	S	G	0.997	Carbamidomethyl (+57)	1215.57	3	-6.3e-05	-0.052
YSGAFKCLRDGAGDV	192	206	S	A	0.997	Carbamidomethyl (+57)	1614.75	3	0.0017	1.1
YSGAFKCLRDGAGDV	192	206	S	A	0.997	Carbamidomethyl (+57)	1614.75	2	0.0012	0.75
YSGAFKCLRDGAGDV	192	206	S	A	0.997	Carbamidomethyl (+57)	1614.75	3	0.0017	1.1
YSGAFKCLRDGAGDV	192	206	S	A	0.997	Carbamidomethyl (+57)	1614.75	2	0.001	0.63
YSGAFKCLRDGAGDVA	192	207	S	F	0.997	Carbamidomethyl (+57)	1685.78	3	-0.00016	-0.097
YSGAFKCLRDGAGDVA	192	207	S	F	0.997	Carbamidomethyl (+57)	1685.78	2	-0.0017	-1
YSGAFKCLRDGAGDVA	192	207	S	F	0.969	Carbamidomethyl (+57)	1685.78	3	-0.00046	-0.27
YSGAFKCLRDGAGDVA	192	207	S	F	0.997	Carbamidomethyl (+57)	1685.78	3	0.00014	0.081
YSGAFKCLRDGAGDVA	192	207	S	F	0.997	Carbamidomethyl (+57)	1685.79	2	0.0025	1.5
YSGAFKCLRDGAGDVA	192	207	S	F	0.997	Carbamidomethyl (+57)	1685.79	2	0.0061	3.6
YSGAFKCLRDGAGDVA	192	207	S	F	0.997	Carbamidomethyl (+57)	1685.78	2	0.00011	0.067
YSGAFKCLRDGAGDVAFI	192	209	S	R	0.997	Carbamidomethyl (+57)	1945.94	3	0.001	0.53
YSGAFKCLRDGAGDVAFI	192	209	S	R	0.997	Carbamidomethyl (+57)	1945.94	2	0.00041	0.21
SGAFKCLRDGAGDVA	193	207	Y	F	0.989	Carbamidomethyl (+57)	1522.72	2	-0.0026	-1.7
GAFKCLRDGAGDVA	194	207	S	F	0.994	Carbamidomethyl (+57)	1435.69	3	0.00014	0.095
GAFKCLRDGAGDVA	194	207	S	F	0.997	Carbamidomethyl (+57)	1435.69	2	-0.00099	-0.69
GAFKCLRDGAGDVA	194	207	S	F	0.978	Carbamidomethyl (+57)	1435.69	3	-0.00016	-0.11
GAFKCLRDGAGDVA	194	207	S	F	0.997	Carbamidomethyl (+57)	1435.69	2	1.3e-05	0.0088
AFKCLRDGAGDVA	195	207	G	F	0.99	Carbamidomethyl (+57)	1378.67	3	3.7e-05	0.027
AFKCLRDGAGDVA	195	207	G	F	0.997	Carbamidomethyl (+57)	1378.67	2	-0.00049	-0.35
FKCLRDGAGDV	196	206	A	A	0.954	Carbamidomethyl (+57)	1236.6	2	0.0055	4.5
FKCLRDGAGDV	196	206	A	A	0.997	Carbamidomethyl (+57)	1236.59	2	-0.00029	-0.23
FKCLRDGAGDV	196	206	A	A	0.997	Carbamidomethyl (+57)	1236.59	2	-0.0017	-1.4
FKCLRDGAGDVA	196	207	A	F	0.997	Carbamidomethyl (+57)	1307.63	2	-0.00019	-0.14
FKCLRDGAGDVA	196	207	A	F	0.997	Carbamidomethyl (+57)	1307.63	2	-0.0012	-0.91
FKCLRDGAGDVA	196	207	A	F	0.997	Carbamidomethyl (+57)	1307.63	2	-0.00019	-0.14
FKCLRDGAGDVA	196	207	A	F	0.952	Carbamidomethyl (+57)	1307.63	2	-0.002	-1.5
FKCLRDGAGDVA	196	207	A	F	0.997	Carbamidomethyl (+57)	1307.63	2	-0.00039	-0.3
FKCLRDGAGDVA	196	207	A	F	0.997	Carbamidomethyl (+57)	1307.63	2	-0.00039	-0.3
FKCLRDGAGDVAF	196	208	A	I	0.997	Carbamidomethyl (+57)	1454.7	2	0.00081	0.56
KCLRDGAGDV	197	206	F	A	0.971	Carbamidomethyl (+57)	1089.52	2	0.00091	0.84
KCLRDGAGDVA	197	207	F	F	0.997	Carbamidomethyl (+57)	1160.56	2	-0.0014	-1.2
KCLRDGAGDVA	197	207	F	F	0.982	Carbamidomethyl (+57)	1160.56	2	0.00041	0.36
KCLRDGAGDVA	197	207	F	F	0.997	Carbamidomethyl (+57)	1160.56	2	-0.00059	-0.51
KCLRDGAGDVA	197	207	F	F	0.997	Carbamidomethyl (+57)	1160.56	2	-0.00079	-0.68
KCLRDGAGDVAF	197	208	F	I	0.997	Carbamidomethyl (+57)	1307.63	1	-0.0027	-2.1
KCLRDGAGDVAF	197	208	F	I	0.997	Carbamidomethyl (+57)	1307.63	2	-0.00039	-0.3
KCLRDGAGDVAF	197	208	F	I	0.997	Carbamidomethyl (+57)	1307.63	2	0.001	0.77
KCLRDGAGDVAF	197	208	F	I	0.961	Carbamidomethyl (+57)	1307.63	3	-0.00046	-0.35
KCLRDGAGDVAF	197	208	F	I	0.997	Carbamidomethyl (+57)	1307.63	2	-0.0016	-1.2
KCLRDGAGDVAFI	197	209	F	R	0.965	Carbamidomethyl (+57)	1420.71	3	-0.00046	-0.33
KCLRDGAGDVAFI	197	209	F	R	0.991	Carbamidomethyl (+57)	1420.71	2	-0.0039	-2.7
KCLRDGAGDVAFI	197	209	F	R	0.997	Carbamidomethyl (+57)	1420.71	2	-0.0021	-1.5
KCLRDGAGDVAFIRESTVF	197	215	F	E	0.987	Carbamidomethyl (+57)	2140.07	4	0.00036	0.17
KCLRDGAGDVAFIRESTVF	197	215	F	E	0.997	Carbamidomethyl (+57)	2140.07	3	-0.00056	-0.26
KCLRDGAGDVAFIRESTVF	197	215	F	E	0.997	Carbamidomethyl (+57)	2140.07	3	-0.00026	-0.12
KCLRDGAGDVAFIRESTVFEDLSDEAERDEY	197	227	F	E	0.965	Carbamidomethyl (+57)	3591.65	5	0.0034	0.94
KCLRDGAGDVAFIRESTVFEDLSDEAERDEY	197	227	F	E	0.993	Carbamidomethyl (+57)	3591.65	5	0.0029	0.8
KCLRDGAGDVAFIRESTVFEDLSDEAERDEYELLCPDNTRKPVDKF	197	242	F	K	0.997	Carbamidomethyl (+57), Carbamidomethyl (+57)	5404.57	7	0.0056	1
KCLRDGAGDVAFIRESTVFEDLSDEAERDEYELLCPDNTRKPVDKF	197	242	F	K	0.997	Carbamidomethyl (+57), Carbamidomethyl (+57)	5404.56	7	-0.0014	-0.27
CLRDGAGDV	198	206	K	A	0.997	Carbamidomethyl (+57)	961.43	2	-0.00049	-0.51
CLRDGAGDV	198	206	K	A	0.997	Carbamidomethyl (+57)	961.43	2	-0.0017	-1.8
CLRDGAGDVA	198	207	K	F	0.997	Carbamidomethyl (+57)	1032.47	2	-0.00079	-0.76
CLRDGAGDVA	198	207	K	F	0.997	Carbamidomethyl (+57)	1032.47	2	-0.00039	-0.37
CLRDGAGDVAF	198	208	K	I	0.997	Carbamidomethyl (+57)	1179.53	2	-0.00019	-0.16
CLRDGAGDVAF	198	208	K	I	0.997	Carbamidomethyl (+57)	1179.53	2	-0.0016	-1.3
CLRDGAGDVAFIR	198	210	K	E	0.994	Carbamidomethyl (+57)	1448.72	3	0.0017	1.2
CLRDGAGDVAFIR	198	210	K	E	0.997	Carbamidomethyl (+57)	1448.72	2	-0.0032	-2.2
CLRDGAGDVAFIR	198	210	K	E	0.997	Carbamidomethyl (+57)	1448.72	3	-6.3e-05	-0.044
CLRDGAGDVAFIR	198	210	K	E	0.997	Carbamidomethyl (+57)	1448.72	2	-0.00059	-0.41
CLRDGAGDVAFIR	198	210	K	E	0.997	Carbamidomethyl (+57)	1448.72	3	-0.0034	-2.3
CLRDGAGDVAFIR	198	210	K	E	0.997	Carbamidomethyl (+57)	1448.72	3	-6.3e-05	-0.044
CLRDGAGDVAFIR	198	210	K	E	0.997	Carbamidomethyl (+57)	1448.72	3	-6.3e-05	-0.044
CLRDGAGDVAFIR	198	210	K	E	0.997	Carbamidomethyl (+57)	1448.72	2	0.0016	1.1
CLRDGAGDVAFIR	198	210	K	E	0.997	Carbamidomethyl (+57)	1448.72	3	-0.00096	-0.66
CLRDGAGDVAFIR	198	210	K	E	0.997	Carbamidomethyl (+57)	1448.72	2	-0.0012	-0.82
CLRDGAGDVAFIR	198	210	K	E	0.997	Carbamidomethyl (+57)	1448.72	3	-6.3e-05	-0.044
CLRDGAGDVAFIR	198	210	K	E	0.997	Carbamidomethyl (+57)	1448.72	3	-0.00066	-0.46
LRDGAGDVA	199	207	C	F	0.975		872.44	2	0.00028	0.32
RDGAGDVA	200	207	L	F	0.949		759.35	2	-0.00022	-0.29
RDGAGDVA	200	207	L	F	0.971		759.35	2	0.00018	0.23
RDGAGDVAF	200	208	L	I	0.962		906.42	2	0.00038	0.42
RDGAGDVAFIRESTVFEDLSDEAERDEY	200	227	L	E	0.997		3190.43	4	0.00073	0.23
DGAGDVAFIR	201	210	R	E	0.968		1019.5	2	7.8e-05	0.076
DGAGDVAFIR	201	210	R	E	0.995		1019.5	2	-0.0023	-2.3
DGAGDVAFIR	201	210	R	E	0.996		1019.51	2	0.0021	2
DGAGDVAFIR	201	210	R	E	0.997		1019.5	2	7.8e-05	0.076
DGAGDVAFIR	201	210	R	E	0.997		1019.5	2	-0.00052	-0.51
DGAGDVAFIR	201	210	R	E	0.997		1019.5	2	-0.00032	-0.32
DGAGDVAFIR	201	210	R	E	0.997		1019.5	2	-0.00012	-0.12
DGAGDVAFIR	201	210	R	E	0.997		1019.5	2	7.8e-05	0.076
DGAGDVAFIR	201	210	R	E	0.997		1019.5	2	-0.00032	-0.32
DGAGDVAFIR	201	210	R	E	0.997		1019.5	2	-0.00032	-0.32
DGAGDVAFIR	201	210	R	E	0.992		1019.51	2	0.0019	1.8
DGAGDVAFIR	201	210	R	E	0.997		1019.5	2	-0.00052	-0.51
DGAGDVAFIR	201	210	R	E	0.974		1019.5	2	0.0011	1.1
DGAGDVAFIR	201	210	R	E	0.997		1019.5	2	-0.00012	-0.12
DGAGDVAFIR	201	210	R	E	0.997		1019.5	2	-0.00052	-0.51
DGAGDVAFIR	201	210	R	E	0.997		1019.5	2	-0.00012	-0.12
DGAGDVAFIR	201	210	R	E	0.997		1019.5	2	-0.00072	-0.71
DGAGDVAFIR	201	210	R	E	0.997		1019.5	2	0.00028	0.27
DGAGDVAFIR	201	210	R	E	0.997		1019.5	2	7.8e-05	0.076
DGAGDVAFIR	201	210	R	E	0.997		1019.5	2	7.8e-05	0.076
DGAGDVAFIR	201	210	R	E	0.997		1019.5	2	7.8e-05	0.076
DGAGDVAFIR	201	210	R	E	0.997		1019.5	2	0.00048	0.47
DGAGDVAFIRESTVFEDLSDEAERDEYELLCPDNTR	201	236	R	K	0.997	Phospho (+80), Carbamidomethyl (+57)	4212.82	3	0.004	0.95
AFIRESTVFEDLSDEA	207	222	V	E	0.977		1827.85	2	-0.0013	-0.72
AFIRESTVFEDLSDEAERDEYELLCPDNTRKPVDKFKDCHLA	207	248	V	R	0.997	Carbamidomethyl (+57), Carbamidomethyl (+57)	5057.39	7	0.0037	0.73
AFIRESTVFEDLSDEAERDEYELLCPDNTRKPVDKFKDCHLA	207	248	V	R	0.997	Carbamidomethyl (+57), Carbamidomethyl (+57)	5057.39	6	0.007	1.4
FIRESTVF	208	215	A	E	0.99		997.52	2	0.00058	0.58
FIRESTVF	208	215	A	E	0.99		997.52	2	-2.2e-05	-0.022
FIRESTVF	208	215	A	E	0.99		997.52	2	0.00078	0.78
FIRESTVFEDL	208	218	A	S	0.997		1354.68	2	0.0011	0.8
FIRESTVFEDL	208	218	A	S	0.997		1354.68	2	0.00088	0.65
FIRESTVFEDLSDE	208	221	A	A	0.989		1685.78	2	0.00088	0.52
FIRESTVFEDLSDEA	208	222	A	E	0.961		1756.82	2	0.008	4.5
FIRESTVFEDLSDEA	208	222	A	E	0.997	Phospho (+80)	1836.78	2	0.0018	1
FIRESTVFEDLSDEA	208	222	A	E	0.986		1756.83	2	0.014	7.7
FIRESTVFEDLSDEAERDEY	208	227	A	E	0.997		2449.1	3	0.0034	1.4
FIRESTVFEDLSDEAERDEY	208	227	A	E	0.997		2449.09	3	0.0019	0.78
FIRESTVFEDLSDEAERDEYELL	208	230	A	C	0.997		2804.3	3	0.0007	0.25
FIRESTVFEDLSDEAERDEYELLCPDNT	208	235	A	R	0.997	Carbamidomethyl (+57)	3391.52	3	0.013	3.8
FIRESTVFEDLSDEAERDEYELLCPDNTRKPVDKFKDCHLA	208	248	A	R	0.996	Carbamidomethyl (+57), Carbamidomethyl (+57)	4986.36	5	0.014	2.8
FIRESTVFEDLSDEAERDEYELLCPDNTRKPVDKFKDCHLA	208	248	A	R	0.997	Carbamidomethyl (+57), Carbamidomethyl (+57)	4986.34	7	-0.0015	-0.31
FIRESTVFEDLSDEAERDEYELLCPDNTRKPVDKFKDCHLA	208	248	A	R	0.997	Carbamidomethyl (+57), Carbamidomethyl (+57)	4987.35	5	1	200
FIRESTVFEDLSDEAERDEYELLCPDNTRKPVDKFKDCHLA	208	248	A	R	0.997	Carbamidomethyl (+57), Carbamidomethyl (+57)	4986.35	6	0.0017	0.35
FIRESTVFEDLSDEAERDEYELLCPDNTRKPVDKFKDCHLA	208	248	A	R	0.965	Carbamidomethyl (+57), Carbamidomethyl (+57)	4985.31	6	-1	-210
FIRESTVFEDLSDEAERDEYELLCPDNTRKPVDKFKDCHLA	208	248	A	R	0.997	Carbamidomethyl (+57), Carbamidomethyl (+57)	4986.35	5	0.0045	0.91
FIRESTVFEDLSDEAERDEYELLCPDNTRKPVDKFKDCHLA	208	248	A	R	0.997	Carbamidomethyl (+57), Carbamidomethyl (+57)	4986.34	6	-5.7e-05	-0.011
FIRESTVFEDLSDEAERDEYELLCPDNTRKPVDKFKDCHLA	208	248	A	R	0.997	Carbamidomethyl (+57), Carbamidomethyl (+57)	4987.35	5	1	200
FIRESTVFEDLSDEAERDEYELLCPDNTRKPVDKFKDCHLA	208	248	A	R	0.997	Carbamidomethyl (+57), Carbamidomethyl (+57)	4986.35	5	0.00052	0.1
FIRESTVFEDLSDEAERDEYELLCPDNTRKPVDKFKDCHLA	208	248	A	R	0.997	Carbamidomethyl (+57), Carbamidomethyl (+57)	4986.35	7	0.00057	0.11
IRESTVFEDL	209	218	F	S	0.994		1207.61	2	0.00088	0.73
IRESTVFEDL	209	218	F	S	0.996		1207.61	2	0.00048	0.4
IRESTVFEDLSDEAERDEY	209	227	F	E	0.997		2302.02	2	-0.0024	-1.1
IRESTVFEDLSDEAERDEY	209	227	F	E	0.997		2302.03	3	0.0013	0.57
IRESTVFEDLSDEAERDEY	209	227	F	E	0.997		2302.03	3	0.0016	0.7
[truncated: 7,896 more rows]
