# Supplementary material for: Characterization of recombinant human lactoferrin expressed in Komagataella phaffii
Source: Royal Society of Chemistry journal article supplement (doi:10.1039/d4an00333k), 2024-01-01
Supplement: d4an00333k3.xlsx [file d4an00333k3.xlsx]

## Sheet: Table S2-contaminating proteins
Characterization of Recombinant Human Lactoferrin Expressed in Komagataella Phaffii
Xiaoning Lu1*, Chad Cummings1, Anthony Osuala1, Neela H. Yennawar2, Kevin E. W. Namitz2, Brittney Hellner1, Pamela B. Besada-Lombana1, Ross D. Peterson1, Anthony J. Clark1
Supplementary Table S2. The identified proteins by LC-MS/MS proteomics as well as their relative abundance (%)
Identified Proteins (23)	Accession Number	Avg. Relative % (n=3) (based on XIC peak intensity)2	Avg. Relative % (n=3) (adjusted based on HPLC data)3
LACTOFERRIN	LACTOFERRIN	99.7871	97.6
Phosphoglycerate kinase	C4QY07	0.0454882	0.492637
Endoplasmic reticulum chaperone BiP	C4QZS3	0.0428364	0.463918
MannosidaseTR	MannosidaseTR	0.0327984	0.355206
SCP domain-containing protein	C4R3H3	0.0285196	0.308867
Catalase	C4R2S1	0.0139455	0.15103
5-methyltetrahydrop teroyltriglutamate homocysteine S-methyltransferase	C4QZU2	0.0111177	0.120405
Superoxide dismutase [Cu-Zn]	C4R8X7	0.00996369	0.107907
ribonuclease T2	C4QZY8	0.00811962	0.0879355
Cytochrome c isoform 1	C4R6L9	0.00799613	0.0865981
Uncharacterized protein	C4R0Z8	0.00389136	0.0421435
L-type lectin-like domain-containing protein	C4R2L8	0.00382873	0.0414651
Uncharacterized protein	C4R0V6	0.0029234	0.0316604
Superoxide dismutase copper/zinc binding domain-containing protein	C4QW48	0.00228556	0.0247526
Heat shock protein that cooperates with Ydj1p (Hsp40) and Ssa1p (Hsp70)	C4QV89	0.00192462	0.0208437
Aminotransferase class I/classII domain-containing protein	C4R862	0.00177455	0.0192184
Molecular chaperone	C4QVC4	0.00176494	0.0191143
Type II HSP40 co-chaperone that interacts with the HSP70 protein Ssa1p	C4R2Q1	0.000935299	0.0101293
Sedoheptulose 1 7-bisphosphatase	C4R2M0	0.000659381	0.0071411
Xylose and arabinose reductase	C4R135	0.000436987	0.00473257
FACT complex subunit	C4QYQ8	0.000319168	0.00345659
Transketolase similar to Tkl2p	C4R5P8	0.000250801	0.00271617
Fructose-bisphosphate aldolase	C4QW09	0.000246246	0.00266684
		Total contaminating proteins	2.40454
Note: 2 the avg. relative % (based on XIC peak area) is computed based on the sum of the XIC peak intensities of the top three peptides of each identified proteins
3 the avg. relative % (adjusted based on HPLC data) is adjusted by multiplying the avg. relative % (based on XIC peak area) with a factor 10.83 so that the total contaminating protein is 2.4% and rhLF 97.6%, based on the HPLC results.
