# Supplementary material for: Characterization of recombinant human lactoferrin expressed in Komagataella phaffii
Source: Royal Society of Chemistry journal article supplement (doi:10.1039/d4an00333k), 2024-01-01
Supplement: d4an00333k4.xlsx [file d4an00333k4.xlsx]

## Sheet: Table S3
Characterization of Recombinant Human Lactoferrin Expressed in Komagataella Phaffii
Xiaoning Lu1*, Chad Cummings1, Anthony Osuala1, Neela H. Yennawar2, Kevin E. W. Namitz2, Brittney Hellner1, Pamela B. Besada-Lombana1, Ross D. Peterson1, Anthony J. Clark1
Supplementary Table S3. The detected glycopeptides of Helaian rhLF by LC-MS/MS
Site	Glycopeptide sequence	Glycan composition	Charge (+)	Observed m/z (monoisotopic)	Theoretical m/z (monoisotopic)	Observed Mass (monoisotopic)	Calculated Mass (monoisotopic)	Mass Error ppm
Asn-156	PFLNWTGPPEPIEAAVAR	HexNAc(2)Hex(4)	3	1007.13	1007.14	3018.38	3018.39	-1.23
Asn-156	PFLNWTGPPEPIEAAVAR	HexNAc(2)Hex(5)	3	1061.15	1061.15	3180.44	3180.44	1.51
Asn-156	PFLNWTGPPEPIEAAVAR	HexNAc(2)Hex(5)	2	1591.23	1591.23	3180.44	3180.44	-0.66
Asn-156	PFLNWTGPPEPIEAAVAR	HexNAc(2)Hex(6)	3	1115.17	1115.17	3342.49	3342.49	0.64
Asn-156	PFLNWTGPPEPIEAAVAR	HexNAc(2)Hex(7)	3	1169.19	1169.19	3504.54	3504.54	0.27
Asn-156	PFLNWTGPPEPIEAAVAR	HexNAc(2)Hex(8)	3	1223.2	1223.21	3666.59	3666.6	-1.56
Asn-156	PFLNWTGPPEPIEAAVAR	HexNAc(2)Hex(9)	3	1277.23	1277.22	3828.66	3828.65	1.54
Asn-156	PFLNWTGPPEPIEAAVAR	HexNAc(2)Hex(10)	3	1331.24	1331.24	3990.71	3990.7	0.91
Asn-156	PFLNWTGPPEPIEAAVAR	HexNAc(2)Hex(11)	3	1384.92	1385.26	4151.75	4152.75	-0.05
Asn-156	PFLNWTGPPEPIEAAVAR	HexNAc(2)Hex(12)	3	1439.28	1439.28	4314.82	4314.81	1.82
Asn-156	TAGWNVPIGTLRPFLNWTGPPEPIEAAVAR	HexNAc(2)Hex(4)	3	1429.03	1429.03	4284.08	4284.07	1.47
Asn-156	TAGWNVPIGTLRPFLNWTGPPEPIEAAVAR	HexNAc(2)Hex(5)	4	1112.54	1112.54	4446.13	4446.13	0.69
Asn-156	TAGWNVPIGTLRPFLNWTGPPEPIEAAVAR	HexNAc(2)Hex(6)	4	1153.05	1153.05	4608.17	4608.18	-1.37
Asn-156	TAGWNVPIGTLRPFLNWTGPPEPIEAAVAR	HexNAc(2)Hex(7)	3	1591.09	1591.08	4770.23	4770.23	0.49
Asn-156	TAGWNVPIGTLRPFLNWTGPPEPIEAAVAR	HexNAc(2)Hex(7)	4	1193.57	1193.57	4770.23	4770.23	0.71
Asn-156	TAGWNVPIGTLRPFLNWTGPPEPIEAAVAR	HexNAc(2)Hex(8)	4	1234.08	1234.08	4932.28	4932.28	-0.12
Asn-156	TAGWNVPIGTLRPFLNWTGPPEPIEAAVAR	HexNAc(2)Hex(9)	4	1274.59	1274.59	5094.34	5094.34	0.05
Asn-156	TAGWNVPIGTLRPFLNWTGPPEPIEAAVAR	HexNAc(2)Hex(10)	4	1315.1	1315.1	5256.38	5256.39	-1.27
Asn-156	TAGWNVPIGTLRPFLNWTGPPEPIEAAVAR	HexNAc(2)Hex(11)	4	1355.62	1355.62	5418.43	5418.44	-1.6
Asn-156	TAGWNVPIGTLRPFLNWTGPPEPIEAAVAR	HexNAc(2)Hex(12)	4	1396.13	1396.13	5580.49	5580.5	-0.96
Asn-497	TAGWNIPMGLLFNQTGSC*K	HexNAc(2)Hex(5)	3	1104.48	1104.48	3310.43	3310.42	0.52
Asn-497	TAGWNIPMGLLFNQTGSC*K	HexNAc(2)Hex(6)	3	1158.5	1158.5	3472.48	3472.48	1.32
Asn-497	TAGWNIPMGLLFNQTGSC*K	HexNAc(2)Hex(7)	3	1212.52	1212.52	3634.53	3634.53	1.13
Asn-497	TAGWNIPMGLLFNQTGSC*K	HexNAc(2)Hex(8)	3	1266.54	1266.54	3796.58	3796.58	0.19
Asn-497	TAGWNIPMGLLFNQTGSC*K	HexNAc(2)Hex(9)	3	1320.55	1320.55	3958.64	3958.64	0.81
Asn-497	TAGWNIPMGLLFNQTGSC*K	HexNAc(2)Hex(10)	3	1374.24	1374.57	4119.69	4120.69	0.92
Asn-497	TAGWNIPMGLLFNQTGSC*K	HexNAc(2)Hex(11)	3	1428.25	1428.59	4281.74	4282.74	-0.25
Asn-497	TAGWNIPMGLLFNQTGSC*K	HexNAc(2)Hex(12)	3	1482.94	1482.61	4445.8	4444.79	0.02
Asn-497	TAGWNIPM*GLLFNQTGSC*K	HexNAc(2)Hex(5)	3	1109.81	1109.81	3326.42	3326.42	0.22
Asn-497	TAGWNIPM*GLLFNQTGSC*K	HexNAc(2)Hex(6)	3	1163.83	1163.83	3488.47	3488.47	-0.13
Asn-497	TAGWNIPM*GLLFNQTGSC*K	HexNAc(2)Hex(7)	3	1217.85	1217.85	3650.53	3650.53	0.35
Asn-497	TAGWNIPM*GLLFNQTGSC*K	HexNAc(2)Hex(8)	3	1271.87	1271.87	3812.58	3812.58	0.41
Asn-497	TAGWNIPM*GLLFNQTGSC*K	HexNAc(2)Hex(9)	3	1325.89	1325.88	3974.64	3974.63	2.03
Asn-497	TAGWNIPM*GLLFNQTGSC*K	HexNAc(2)Hex(10)	3	1380.24	1379.9	4137.68	4136.68	-0.63
Asn-642	R.NGSDC*PDKFC*LFQSETK.N	HexNAc(2)Hex(5)	3	1083.77	1083.77	3248.29	3248.29	-0.5
Asn-642	R.NGSDC*PDKFC*LFQSETK.N	HexNAc(2)Hex(6)	3	1137.79	1137.79	3410.34	3410.34	-0.07
Asn-642	R.NGSDC*PDKFC*LFQSETK.N	HexNAc(2)Hex(7)	3	1191.81	1191.81	3572.4	3572.39	0.31
Asn-642	R.NGSDC*PDKFC*LFQSETK.N	HexNAc(2)Hex(8)	3	1245.82	1245.82	3734.45	3734.45	0.38
Asn-642	R.NGSDC*PDKFC*LFQSETK.N	HexNAc(2)Hex(9)	3	1299.84	1299.84	3896.5	3896.5	0.99
Asn-642	R.NGSDC*PDKFC*LFQSETK.N	HexNAc(2)Hex(10)	3	1353.86	1353.86	4058.55	4058.55	0.12
Asn-642	R.NGSDC*PDKFC*LFQSETK.N	HexNAc(2)Hex(11)	3	1407.88	1407.88	4220.61	4220.61	1.31
Asn-642	R.NGSDC*PDKFC*LFQSETK.N	HexNAc(2)Hex(12)	3	1461.9	1461.89	4382.66	4382.66	1.41
Note:	N: Asn site with a glycan C*: Carbamidomethyl cysteine M*: Methionine sulfoxide (oxidized methionine)
