# Supplementary material for: Characterization of recombinant human lactoferrin expressed in Komagataella phaffii
Source: Royal Society of Chemistry journal article supplement (doi:10.1039/d4an00333k), 2024-01-01
Supplement: d4an00333k5.xlsx [file d4an00333k5.xlsx]

## Sheet: Table S4
Characterization of Recombinant Human Lactoferrin Expressed in Komagataella Phaffii
Xiaoning Lu1*, Chad Cummings1, Anthony Osuala1, Neela H. Yennawar2, Kevin E. W. Namitz2, Brittney Hellner1, Pamela B. Besada-Lombana1, Ross D. Peterson1, Anthony J. Clark1
Supplementary Table S4. The released and InstantPC-labeled N-glycans of Helaina rhLF detected by LC-MS/MS analysis
Glycan	Observed mass (monoisotopic)	Calculated mass (monoisotopic)	Mass Error ppm	Glycan structure Cartoon
InstantPC-M5	1495.58	1495.58	-2.84587
InstantPC-M6	1657.63	1657.63	-1.45702
InstantPC-M7	1819.68	1819.69	-2.45013
InstantPC-M8	1981.74	1981.74	-2.07779
InstantPC-M9	2143.78	2143.79	-3.53632
InstantPC-M10	2305.83	2305.85	-4.50455
InstantPC-M11	2467.9	2467.9	-0.173482
InstantPC-M12	2629.95	2629.95	-0.162502
InstantPC-M13	2792.01	2792	3.30945
InstantPC-M14	2954.06	2954.06	2.0785
InstantPC-M5P*	1575.55	1575.55	1.14881
InstantPC-M6P*	1737.6	1737.6	1.04167
InstantPC-M7P*	1899.66	1899.65	1.26865
InstantPC-M8P*	2061.71	2061.71	1.75098
InstantPC-M9P*	2223.76	2223.76	2.07307
InstantPC-M10P*	2385.82	2385.81	1.89034
InstantPC-M11P*	2547.87	2547.86	2.63358
InstantPC-M12P*	2709.93	2709.92	3.43553
InstantPC-M13P*	2871.98	2871.97	1.84891
InstantPC-M14P*	3034.04	3034.02	4.35396
* InstantPC-glycan (M5 to M14) with one phosphate group. Their structures remain to be determined.
